# Supplementary material for: Unlocking geminal fluorohaloalkanes in nucleophilic fluoroalkylation chemistry: generation and trapping of lithiumfluorocarbenoids enabled by flow microreactors
Source: Royal Society of Chemistry journal article supplement (doi:10.1039/d2cc06717j), 2022-12-29
Supplement: d2cc06717j1.pdf [file d2cc06717j1.pdf]

# Unlocking geminal fluorohaloalkanes in nucleophilic fluoroalkylation chemistry: generation and trapping of lithiumfluorocarbenoids enabled by flow microreactors

Mauro Spennacchio,<sup>a,†</sup> Marco Colella,<sup>a,†</sup> Michael Andresini,<sup>a</sup> Roberta Savina Dibenedetto,<sup>a</sup> Elena Graziano,<sup>a</sup> Andrea Aramini,<sup>b</sup> Leonardo Degennaro,<sup>\*a</sup> and Renzo Luisi<sup>\*,a</sup>

<sup>a</sup> FLAME-Lab, Flow Chemistry and Microreactor Technology Laboratory, Department of Pharmacy – Drug Sciences, University of Bari “A. Moro” Via E. Orabona 4 - 70125 Bari, Italy.

<sup>b</sup> Department of Discovery, Dompé Farmaceutici S.p.A., Via Campo di Pile, L’Aquila 67100, Italy.

e-mail: [renzo.luisi@uniba.it](mailto:renzo.luisi@uniba.it)

## Supporting Information

Table of contents:

1. [Instrumentation and General Methods](#)
2. [Batch procedures](#)
3. [General procedures for the continuous-flow nucleophilic fluoroalkylation](#)
4. [Characterization of compounds \*\*3aa-3ck\*\*](#)
5. [Copy of <sup>1</sup>H, <sup>13</sup>C and <sup>19</sup>F NMR spectra for compounds \*\*3aa-3ck\*\*](#)
6. [References](#)

## 1. Instrumentation and General methods

Infrared spectra were recorded in reciprocal centimeters ( $\text{cm}^{-1}$ ) by using a PerkinElmer 283 spectrometer. Melting points (uncorrected) were measured with Büchi melting point B-545.  $^1\text{H}$ ,  $^{13}\text{C}$  and  $^{19}\text{F}$  NMR spectra were recorded with a Varian Mercury 300 spectrometer (300 MHz for  $^1\text{H}$ , 75 MHz for  $^{13}\text{C}$ , 282 MHz for  $^{19}\text{F}$ ) and an Agilent 500 spectrometer (500 MHz for  $^1\text{H}$ , 126 MHz for  $^{13}\text{C}$ , 470 MHz for  $^{19}\text{F}$ ). The residual solvent signal was used as an internal standard which was related to TMS with  $\delta$  7.26 ppm ( $^1\text{H}$  in  $\text{CDCl}_3$ ),  $\delta$  77.00 ppm ( $^{13}\text{C}$  in  $\text{CDCl}_3$ ). Spin-spin coupling constants ( $J$ ) are given in Hz. When possible, unambiguous assignment of all resonances was performed by combined application of 2D NMR techniques, *i.e.* HSQC and COSY experiments. Data are reported as follows: chemical shift [multiplicity (s = singlet, d = doublet, t = triplet, q = quartet, p = quintet, m = multiplet and bs = broad signal), coupling constant (in Hz), integration and assignment]. NOESY experiments were performed for structure elucidation. High resolution mass spectrometry (HRMS) spectra were performed on Agilent 6530 accurate mass Q-TOF instrument and Excalibur data system. Diastereomeric ratios were assessed by  $^1\text{H}$  NMR analysis on the reaction crude. Silica (70–230 mesh and 230–400 mesh) was used for flash chromatography on glass columns. TLC analysis were performed on a 0.25 mm precoated silica gel thick plates (Merck) with a fluorescence indicator F-254; the spots were visualized under UV light ( $\lambda = 254$  nm) and/or  $\text{KMnO}_4$  (aq.) was used as revealing system.

Chemicals were purchased from Sigma-Aldrich, Fluorochem, TCI Europe and Alfa Aesar unless otherwise specified and used without further purification. THF was distilled prior to use. Organolithium reagents were titrated prior to use (using *N*-benzylbenzamide as titrating agent).<sup>1</sup>

*Flow equipment:* Stainless steel (SUS304) T-shaped micromixers with inner diameters of 250  $\mu\text{m}$  were manufactured by Sanko Seiki Co., Inc. Stainless steel (SUS316) microtube reactors with inner diameter of 1000  $\mu\text{m}$  purchased from GL Sciences were used unless otherwise stated. The micromixers and microtube reactors were connected with stainless steel fittings (GL Sciences, 1/16 OUV). A cryogenic bath was used to control the temperature. Solutions of reagents were fluxed using syringe pumps Harvard PHD 2000, equipped with gastight syringes purchased from SGE.

### 1.1 Picture of the continuous flow microreactor system

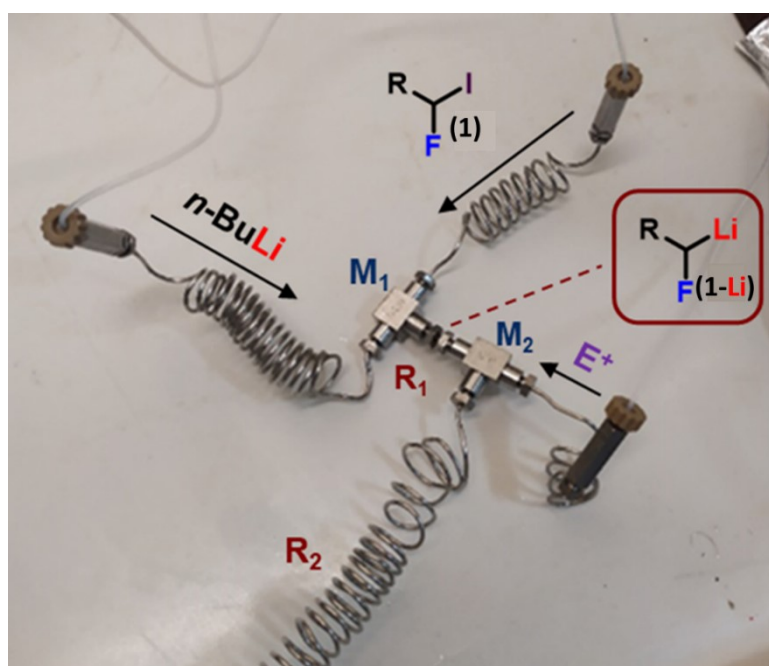

Figure S1. Continuous flow system.

Fluoroiodoalkanes were reacted with *n*-BuLi using T-shaped micromixer M<sub>1</sub> and microtube reactor R<sub>1</sub>. The resulting solutions were reacted with electrophile in T-shaped micromixer M<sub>2</sub> and microtube reactor R<sub>2</sub>. The flow microreactor system was dipped in a cooling bath to control the reaction temperature. Precooling units were used.

## 2. Batch procedures

### 2.1 Preparation of substrates

Substrates **1a-c** were prepared adopting reported procedures.<sup>2,3</sup> Spectroscopic data are consistent with those reported in the literature.<sup>2,4,5</sup>

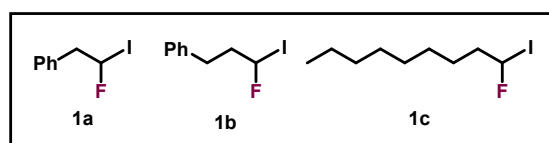

Figure S2. Substrates **1a-c**.

### 2.1 Electrophiles collection

The following compounds are available from Sigma-Aldrich, TCI Europe, Fluorochem and Alfa Aesar except for electrophile **2v**, which was prepared adopting a reported procedure.<sup>6</sup> Spectroscopic data are consistent with those reported in the literature.

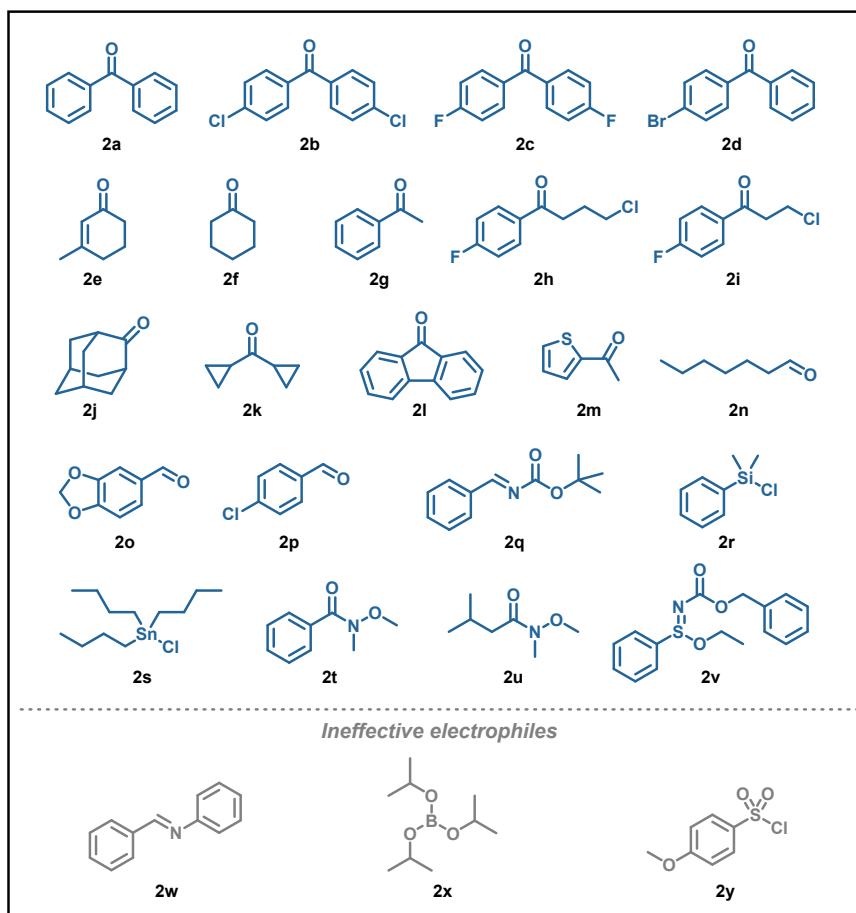

Figure S3. Collection of electrophiles used in this work.

## 2.2 Table S1. Screening of solvents and organolithiums under internal quenching regime

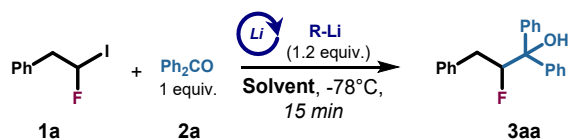

To a stirred solution of **(2-fluoro-2-iodoethyl)benzene (1a)** (50 mg, 0.2 mmol) and **benzophenone (2a)** (36 mg, 0.2 mmol, 1 equiv.) at  $-78^{\circ}\text{C}$ , in **solvent** (2 mL), the organolithium solution (**R-Li**) was added dropwise. The resulting mixture was stirred for 15 min at  $-78^{\circ}\text{C}$  and then quenched with 150  $\mu\text{L}$  of methanol. The crude was washed with distilled water (2 x 2 mL) and the aqueous layers were extracted with ethyl acetate (3 x 5 mL). The combined organic phases were dried over  $\text{Na}_2\text{SO}_4$ , filtered, and concentrated under reduced pressure. Yields of **3aa** were evaluated using  $\text{CH}_2\text{Br}_2$  as an NMR-internal standard.

| Entry | Solvent                         | R-Li    | Yield(%) of 3aa |
|-------|---------------------------------|---------|-----------------|
| 1     | THF-Et <sub>2</sub> O 1:1 (v/v) | MeLi    | 75%             |
| 2     | Toluene                         | MeLi    | 0%              |
| 3     | CPME                            | MeLi    | 0%              |
| 4     | Et <sub>2</sub> O               | MeLi    | 4%              |
| 5     | 2-MeTHF                         | MeLi    | 81%             |
| 6     | THF                             | MeLi    | 90%             |
| 7     | THF                             | n-BuLi  | 54%             |
| 8     | THF                             | n-HexLi | 50%             |

Table S1

## 2.3 Reactivity of 1a-Li, (1-fluoro-2-phenylethyl)lithium

To a stirred solution of **(2-fluoro-2-iodoethyl)benzene (1a)** (50 mg, 0.2 mmol) at  $-78^{\circ}\text{C}$ , in THF (2 mL), **n-BuLi** (1.2 eq.) was added dropwise. The resulting mixture was stirred for 10 min at  $-78^{\circ}\text{C}$  and then 5 min at room temperature. The volatiles were evaporated, and the crude was analyzed by  $^1\text{H}$ ,  $^{19}\text{F}$ -NMR and GC-MS.

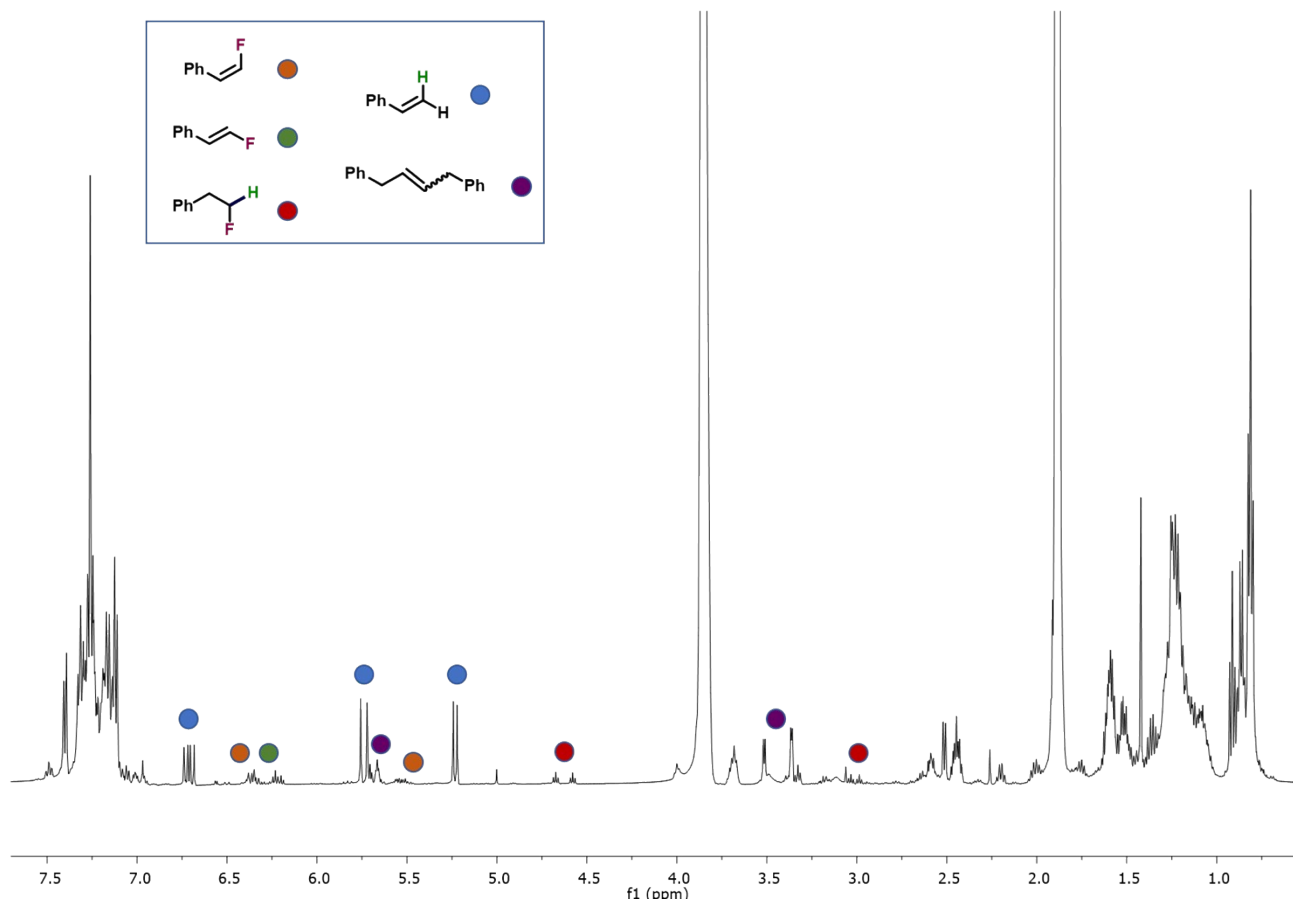

Figure S4.  $^1\text{H}$ -NMR spectrum of the crude

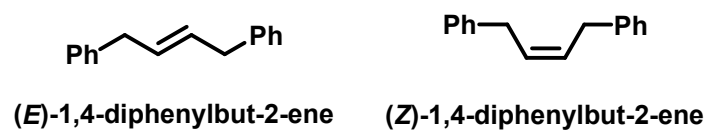

**Reported data for (E)-1,4-diphenylbut-2-ene.**  $^1\text{H}$  NMR (500 MHz,  $\text{CDCl}_3$ )  $\delta$  7.33 (t,  $J = 9.0$  Hz, 4H), 7.24 (m, 6H), 5.75-6.68 (m, 2H), 3.42 (d,  $J = 5.0$  Hz, 4H).<sup>7</sup>

**Reported data for (Z)-1,4-diphenylbut-2-ene.**  $^1\text{H}$  NMR (500 MHz,  $\text{CDCl}_3$ ) r (400 MHz,  $\text{CDCl}_3$ )  $\delta$  (ppm) 7.39-7.20 (m, 10H), 5.87-5.63 (m, 2H), 3.56 (d,  $J = 5.1$  Hz, 4H).<sup>8</sup>

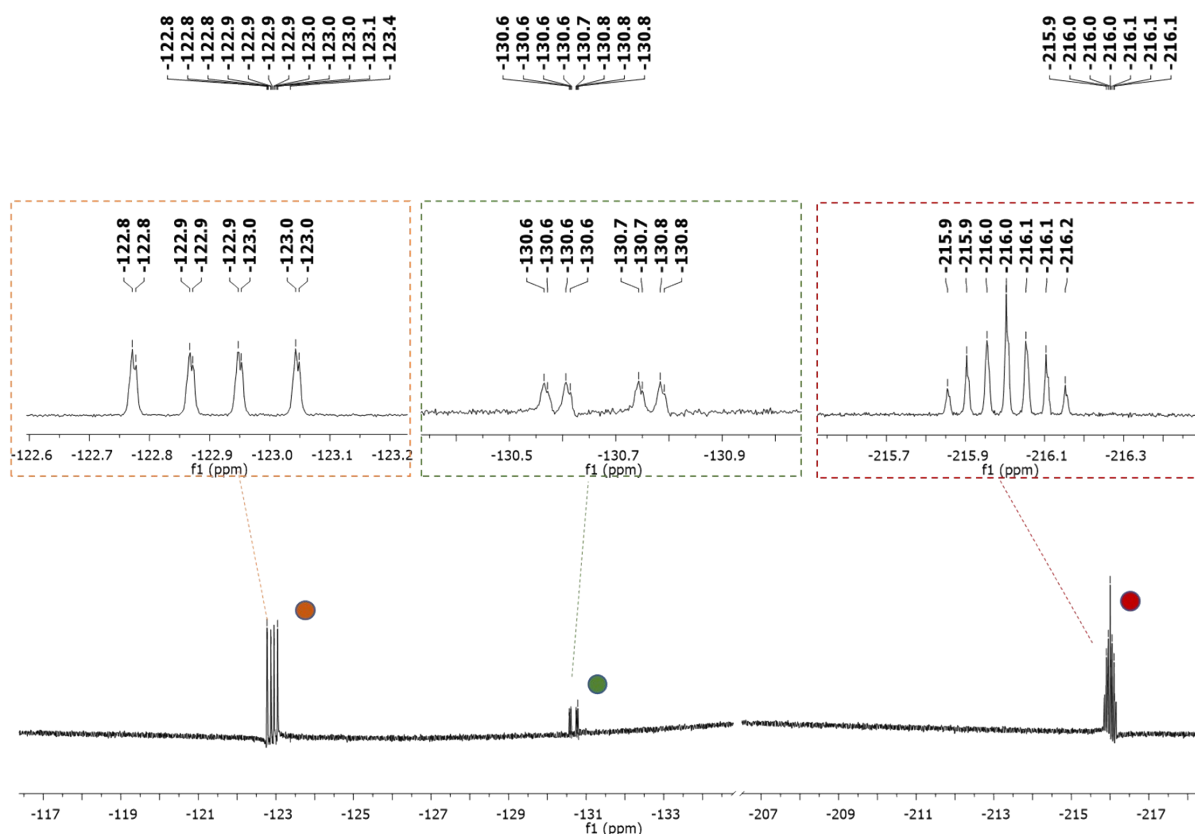

Figure S5.  $^{19}\text{F}$ -NMR spectrum of the crude

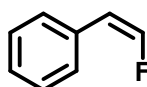

**4a; (Z)-(2-fluorovinyl)benzene**

$^{19}\text{F}$  NMR (470 MHz,  $\text{CDCl}_3$ )  $\delta$  -122.9 (ddd,  $^2J_{(\text{H-F})} = 83.2$  Hz,  $^3J_{(\text{H-F})} = 45.1, 2.7$  Hz, 1F, CHF). Spectroscopic data consistent with literature.<sup>9</sup>

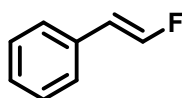

**4b; (E)-(2-fluorovinyl)benzene**

$^{19}\text{F}$  NMR (470 MHz,  $\text{CDCl}_3$ )  $\delta$  -130.7 (ddd,  $^2J_{(\text{H-F})} = 83.1$  Hz,  $^3J_{(\text{H-F})} = 19.4, 3.3$  Hz, 1F, CHF). Spectroscopic data consistent with literature.<sup>10</sup>

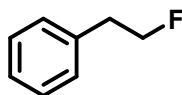

**5; 2-fluoroethylbenzene**

$^{19}\text{F}$  NMR (470 MHz,  $\text{CDCl}_3$ )  $\delta$  -216.1 – -215.8 (m, 1F,  $\text{CH}_2\text{F}$ ). Spectroscopic data consistent with literature.<sup>11</sup>

## 2.4 General procedure for the “batch” monofluoroalkylation

To a stirred solution of **fluoroiodoalkane (1)** (0.3 mmol) and **electrophile (2)** (0.3 mmol, 1 equiv.) at  $-78^{\circ}\text{C}$ , in **solvent** (3 mL), the *n*-butyllithium solution (***n*-BuLi**) (0.36 mmol, 1.2 equiv) was added dropwise. The resulting mixture was stirred for 15 min at  $-78^{\circ}\text{C}$  and then quenched with 150  $\mu\text{L}$  of methanol. The crude was washed with distilled water (2 x 2 mL) and the aqueous layers were extracted with ethyl acetate (3 x 5 mL). The combined organic phases were dried over  $\text{Na}_2\text{SO}_4$ , filtered, and concentrated under reduced pressure. Yields of products **3** were evaluated using  $\text{CH}_2\text{Br}_2$  as an NMR-internal standard.

## 3. General procedures for the continuous-flow nucleophilic fluoroalkylation

### 3.1 General procedure for lithiation of (2-fluoro-2-iodoethyl)benzene (1a) and trapping with benzophenone

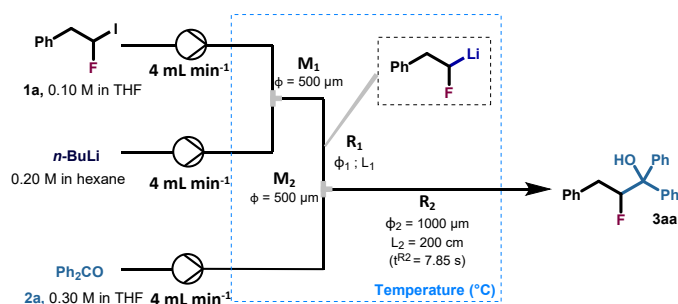

**using a flow microreactor system.**

A microfluidic system consisting of two T-shaped micromixers (**M<sub>1</sub>** and **M<sub>2</sub>**), two microtube reactors (**R<sub>1</sub>** and **R<sub>2</sub>**), and three tube precooling units was used. The microfluidic system was cooled with a cooling bath ( $T^{\circ}\text{C}$ ). A solution of **(2-fluoro-2-iodoethyl)benzene (1a)** (0.10 M in THF) (flow rate: 4.0 mL/min) and a solution of *n*-BuLi (0.20 M in hexane, 2 equiv.) (flow rate: 4.0 mL/min) were introduced to **M<sub>1</sub>** ( $\phi = 500\ \mu\text{m}$ ) by syringe pumps. The resulting solution was passed through **R<sub>1</sub>** and was mixed with a solution of **benzophenone (2a)** (0.30 M in THF, 3 equiv.) (flow rate: 4.0 mL/min) in **M<sub>2</sub>** ( $\phi = 500\ \mu\text{m}$ ). The resulting solution was passed through **R<sub>2</sub>** ( $\phi = 1000\ \mu\text{m}$ ,  $L = 200\ \text{cm}$ ;  $t^{\text{R}2} = 7.85\ \text{s}$ ). After reaching the steady state, the outcoming solution was collected for 1 minute in a vessel containing 2 mL of distilled water. The yield of **3aa** was determined by GC analysis using decane as the internal standard. The results obtained by screening the residence time and the temperature are summarized in the following table and 3D-maps.

**Table S2.** Evaluation of residence time and temperature effects on yield.

| Entry | T (°C) | $\phi_1$           | L <sub>1</sub> | t <sup>R1</sup> (ms) | Yield (%) |
|-------|--------|--------------------|----------------|----------------------|-----------|
| 1     | 0°C    | 250 $\mu\text{m}$  | 3.5cm          | 13ms                 | 0%        |
| 2     | -30°C  | 250 $\mu\text{m}$  | 3.5cm          | 13ms                 | 36%       |
| 3     | -30°C  | 500 $\mu\text{m}$  | 3.5cm          | 52ms                 | 30%       |
| 4     | -30°C  | 750 $\mu\text{m}$  | 3.5cm          | 116ms                | 26%       |
| 5     | -30°C  | 1000 $\mu\text{m}$ | 3.5cm          | 206ms                | 17%       |
| 6     | -30°C  | 1000 $\mu\text{m}$ | 6cm            | 353ms                | 13%       |
| 7     | -50°C  | 250 $\mu\text{m}$  | 3.5cm          | 13ms                 | 79%       |
| 8     | -50°C  | 500 $\mu\text{m}$  | 3.5cm          | 52ms                 | 63%       |
| 9     | -50°C  | 750 $\mu\text{m}$  | 3.5cm          | 116ms                | 58%       |

|    |       |        |        |       |     |
|----|-------|--------|--------|-------|-----|
| 10 | -50°C | 1000µm | 3.5cm  | 206ms | 57% |
| 11 | -50°C | 1000µm | 6cm    | 353ms | 48% |
| 12 | -78°C | 250µm  | 3.5cm  | 13ms  | 68% |
| 13 | -78°C | 500µm  | 3.5cm  | 52ms  | 63% |
| 14 | -78°C | 750µm  | 3.5cm  | 116ms | 53% |
| 15 | -78°C | 1000µm | 3.5cm  | 206ms | 80% |
| 16 | -78°C | 1000µm | 6cm    | 353ms | 38% |
| 17 | -78°C | 1000µm | 12.5cm | 736ms | 24% |

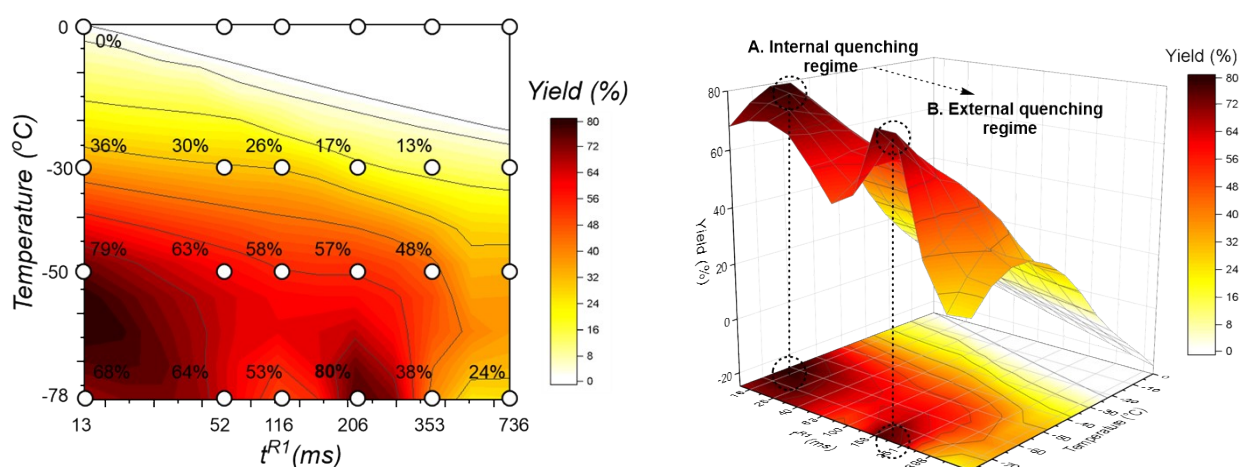

Figure S6. 3-D map.

### 3.2 Evaluation of the transition between internal and external regime

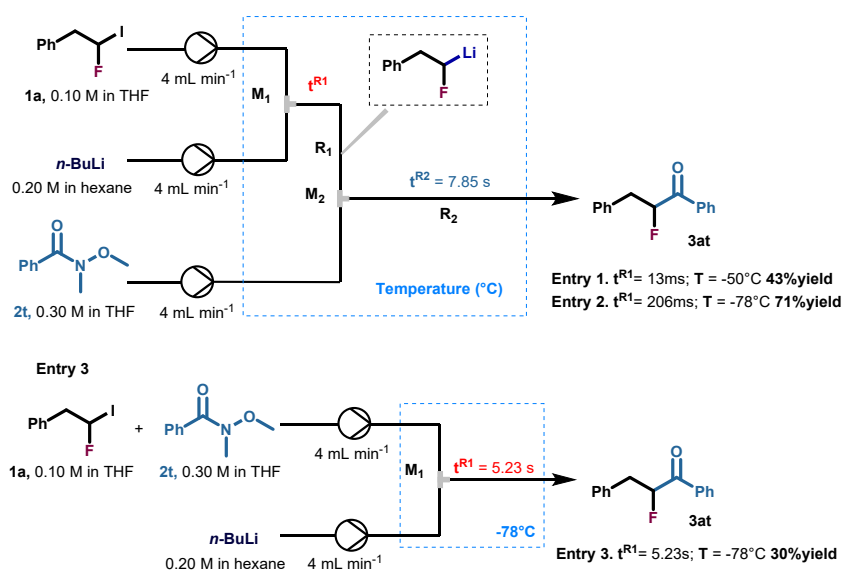

**Entry 1 and 2:** A microfluidic system consisting of two T-shaped micromixers ( $M_1$  and  $M_2$ ), two microtube reactors ( $R_1$  and  $R_2$ ), and three tube precooling units was used. The microfluidic system was cooled with a cooling bath (Entry 1:  $T = -50^\circ\text{C}$ ; Entry 2:  $T = -78^\circ\text{C}$ ). A solution of (2-fluoro-2-iodoethyl)benzene (**1a**) (0.10 M in THF) (flow rate: 4.0 mL/min) and a solution of *n*-BuLi (0.20 M in hexane, 2 equiv.) (flow rate: 4.0 mL/min) were introduced to  $M_1$  ( $\phi = 500\ \mu\text{m}$ ) by syringe pumps. The resulting solution was passed through  $R_1$  (Entry 1:  $\phi = 250\ \mu\text{m}$ ,  $L = 3.5\ \text{cm}$ ,  $t^{R1} = 13\ \text{ms}$ ; Entry 2:  $\phi = 1000\ \mu\text{m}$ ,  $L = 3.5\ \text{cm}$ ,  $t^{R1} = 206\ \text{ms}$ ) and was mixed



with a solution of *N*-methyl-*N*-methoxybenzamide (**2t**) (0.30 M in THF, 3 equiv.) (flow rate: 4.0 mL/min) in **M**<sub>2</sub> ( $\phi = 500 \mu\text{m}$ ). The resulting solution was passed through **R**<sub>2</sub> ( $\phi = 1000 \mu\text{m}$ ,  $L = 200 \text{ cm}$ ;  $t^{\text{R}2} = 7.85 \text{ s}$ ) at  $-78^\circ\text{C}$ . After a steady state was reached, the outcoming solution was collected for 1 minute in a vessel containing 2 mL of distilled water. The yield of **3ab** was determined using  $\text{CH}_2\text{Br}_2$  as an NMR-internal standard.

**Entry 3:** A microfluidic system consisting of one T-shaped micromixer (**M**<sub>1</sub>), one microtube reactor (**R**<sub>1</sub>), and two tube precooling units was used. The microfluidic system was cooled to  $-78^\circ\text{C}$  with a cooling bath ( $T$  °C). A solution of (2-fluoro-2-iodoethyl)benzene (**1a**) (0.10 M in THF) and *N*-methyl-*N*-methoxybenzamide (**2t**) (0.30 M in THF, 3 equiv.) (flow rate: 4.0 mL/min) and a solution of *n*-BuLi (0.20 M in hexane, 2 equiv.) (flow rate: 4.0 mL/min) were introduced to **M**<sub>1</sub> ( $\phi = 500 \mu\text{m}$ ) by syringe pumps. The resulting solution was passed through **R**<sub>1</sub> ( $\phi = 1000 \mu\text{m}$ ,  $L = 200 \text{ cm}$ ,  $t^{\text{R}1} = 5.23 \text{ s}$ ) (flow rate: 4.0 mL/min). After a steady state was reached, the outcoming solution was collected for 1 minute in a vessel containing 2 mL of distilled water. The yield of **3ab** was determined using  $\text{CH}_2\text{Br}_2$  as an NMR-internal standard.

**Table S3.** Evaluation of the transition between internal and external regime.

| Entry | T (°C)              | $\phi_1$           | $L_1$ | $t^{\text{R}1}(\text{ms})$ | Yield (%) |
|-------|---------------------|--------------------|-------|----------------------------|-----------|
| 1     | $-50^\circ\text{C}$ | 250 $\mu\text{m}$  | 3.5cm | 13ms                       | 43%       |
| 2     | $-78^\circ\text{C}$ | 1000 $\mu\text{m}$ | 3.5cm | 206ms                      | 71%       |
| 3     | $-78^\circ\text{C}$ | 1000 $\mu\text{m}$ | 200cm | 5.23s                      | 30%       |

These results suggest that the trapping of the reactive intermediate after 206ms at  $-78^\circ\text{C}$  occurs under an external quenching regime.

### 3.3 General procedure (GP) for the continuous flow nucleophilic-monofluoroalkylation

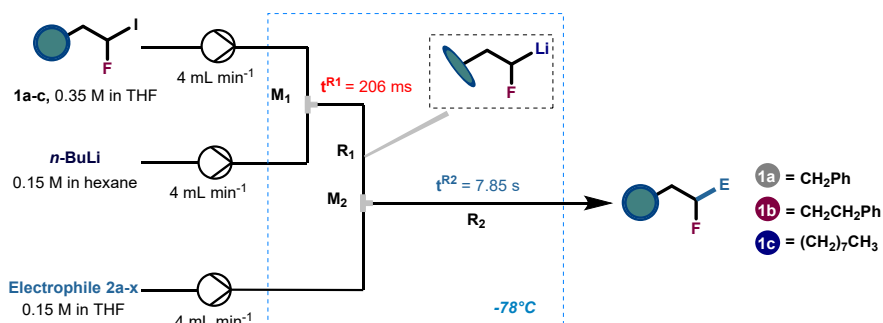

A microfluidic system consisting of two T-shaped micromixers (**M**<sub>1</sub> and **M**<sub>2</sub>), two microtube reactors (**R**<sub>1</sub> and **R**<sub>2</sub>), and three tube precooling units was used. The microfluidic system was cooled to  $-78^\circ\text{C}$  with a cooling bath. A solution of 1-fluoro-1-iodoalkane (**1a-c**) (0.35 M in THF, 2.3 equiv.) (flow rate: 4.0 mL/min) and a solution of *n*-BuLi (0.15 M in hexane, 1 equiv.) (flow rate: 4.0 mL/min) were introduced to **M**<sub>1</sub> ( $\phi = 500 \mu\text{m}$ ) by syringe pumps. The resulting solution was passed through **R**<sub>1</sub> ( $\phi = 1000 \mu\text{m}$ ,  $L = 3.5 \text{ cm}$ ,  $t^{\text{R}1} = 206 \text{ ms}$ ) and was mixed with a solution of electrophile (**2a-x**) (0.15 M in THF, 1 equiv.) (flow rate: 4.0 mL/min) in **M**<sub>2</sub> ( $\phi = 500 \mu\text{m}$ ). The resulting solution was passed through **R**<sub>2</sub> ( $\phi = 1000 \mu\text{m}$ ,  $L = 200 \text{ cm}$ ;  $t^{\text{R}2} = 7.85 \text{ s}$ ). After reaching the steady state, the outcoming solution was collected for 1 minute in a vessel containing 2 mL of distilled water. The aqueous and the organic phase were separated, and the aqueous layer was extracted with  $\text{Et}_2\text{O}$  ( $3 \times 2 \text{ mL}$ ). The combined organic layers were dried over  $\text{Na}_2\text{SO}_4$ , concentrated, and the crude was purified through flash column chromatography, affording the desired product. Purification allowed the recovery of the residual 1-fluoro-1-iodoalkane (up to 70%), which was re-used. Stereochemistry of the products was not assigned.

#### 4. Characterization of compounds 3aa-3ck

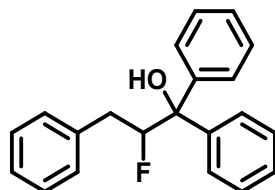

**3aa; 2-fluoro-1,1,3-triphenylpropan-1-ol**

Prepared according to general procedure GP to afford **3aa** as a white waxy solid (174 mg, 95%) after column chromatography ( $R_f=0.3$ , hexane/Et<sub>2</sub>O 9:1); IR (film)/cm<sup>-1</sup> 3436, 3089, 2935, 1954, 1638, 1495, 1449, 1274; <sup>1</sup>H NMR (500 MHz, CDCl<sub>3</sub>)  $\delta$  7.56 (d,  $J=8.1$  Hz, 2H, 2  $\times$  Ar-H), 7.46 (d,  $J=7.4$  Hz, 2H, 2  $\times$  Ar-H), 7.34 (t,  $J=7.6$  Hz, 4H, 4  $\times$  Ar-H), 7.30–7.21 (m, 5H, 5  $\times$  Ar-H, overlapping with CDCl<sub>3</sub>), 7.15 (d,  $J=7.4$  Hz, 2H, 2  $\times$  Ar-H), 5.57 (ddd,  $^2J_{(H-F)}=47.1$  Hz,  $^3J_{(H-H)}=10.0$ , 1.6 Hz, 1H, CHFCH<sub>2</sub>), 3.08–2.99 (m, 1H, PhCHHCHF), 2.72 (d,  $^4J_{(H-F)}=1.7$ , 1H, O-H), 2.68 (ddd,  $^3J_{(H-F)}=42.0$  Hz,  $^2J_{(H-H)}=14.9$ ,  $^3J_{(H-H)}=1.6$  Hz, 1H, PhCHHCHF); <sup>13</sup>C NMR (125 MHz, CDCl<sub>3</sub>)  $\delta$  144.5 (Ar-C<sub>q</sub>), 143.1 (d,  $^3J_{(C-F)}=4.1$  Hz, Ar-C<sub>q</sub>), 138.3 (Ar-C<sub>q</sub>), 129.3 (2  $\times$  Ar-C), 129.4 (2  $\times$  Ar-C), 128.6 (2  $\times$  Ar-C), 128.5 (2  $\times$  Ar-C), 128.4 (2  $\times$  Ar-C), 127.6 (Ar-C), 127.5 (Ar-C), 126.9 (d,  $^4J_{(C-F)}=1.7$  Hz, 2  $\times$  Ar-C), 126.6 (Ar-C), 97.0 (d,  $^1J_{(C-F)}=181.5$  Hz, CHF), 79.4 (d,  $^2J_{(C-F)}=20.7$  Hz, C<sub>q</sub>OHCHF), 35.8 (d,  $^2J_{(C-F)}=21.4$  Hz, PhCH<sub>2</sub>CHF); <sup>19</sup>F NMR (470 MHz, CDCl<sub>3</sub>)  $\delta$  -187.4 (ddd,  $^2J_{(H-F)}=47.1$  Hz,  $^3J_{(H-F)}=42.0$ , 16.6 Hz, 1F, CHF); HRMS (ESI)  $m/z$  Calcd for C<sub>21</sub>H<sub>18</sub>FO [M-H]<sup>-</sup> 305.1347; Found: 305.1338.

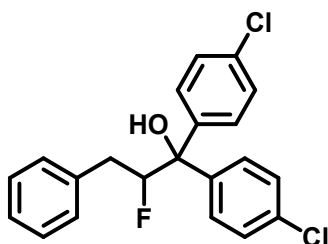

**3ab; 1,1-bis(4-chlorophenyl)-2-fluoro-3-phenylpropan-1-ol**

Prepared according to general procedure GP to afford **3ab** as a white waxy solid (202 mg, 90%) after column chromatography ( $R_f=0.3$ , hexane/Et<sub>2</sub>O 9:1); IR (film)/cm<sup>-1</sup> 3583, 3063, 2932, 1904, 1593, 1492, 1321, 823; <sup>1</sup>H NMR (500 MHz, CDCl<sub>3</sub>)  $\delta$  7.46 (d,  $J=8.6$  Hz, 2H, 2  $\times$  Ar-H), 7.37–7.36 (m, 2H, 2  $\times$  Ar-H), 7.33–7.28 (m, 6H, 6  $\times$  Ar-H), 7.26–7.23 (m, 1H, Ar-H), 7.14 (d,  $J=7.6$  Hz, 2H, 2  $\times$  Ar-H), 5.47 (ddd,  $^2J_{(H-F)}=47.0$  Hz,  $^3J_{(H-H)}=9.9$ , 1.7 Hz, 1H, CHFCH<sub>2</sub>), 3.04–2.95 (m, 1H, PhCHHCHF), 2.73–2.60 (m, 2H, PhCHHCHF overlapping with O-H); <sup>13</sup>C NMR (125 MHz, CDCl<sub>3</sub>)  $\delta$  142.5 (Ar-C<sub>q</sub>), 141.2 (d,  $^3J_{(C-F)}=3.9$  Hz, Ar-C<sub>q</sub>), 137.6 (Ar-C<sub>q</sub>), 133.8 (d,  $^3J_{(C-F)}=4.0$  Hz, Ar-C<sub>q</sub>), 129.3 (2  $\times$  Ar-C), 128.9 (2  $\times$  Ar-C), 128.7 (2  $\times$  Ar-C), 128.6 (2  $\times$  Ar-C), 128.4 (2  $\times$  Ar-C), 127.5 (2  $\times$  Ar-C), 126.8 (Ar-C), 96.6 (d,  $^1J_{(C-F)}=182.2$  Hz, CHF), 78.8 (d,  $^2J_{(C-F)}=21.1$  Hz, C<sub>q</sub>OHCHF), 35.7 (d,  $^2J_{(C-F)}=21.3$  Hz, PhCH<sub>2</sub>CHF); <sup>19</sup>F NMR (470 MHz, CDCl<sub>3</sub>)  $\delta$  -186.8 (ddd,  $^2J_{(H-F)}=47.0$  Hz,  $^3J_{(H-F)}=41.9$ , 16.6 Hz, 1F, CHF); HRMS (ESI)  $m/z$  Calcd for C<sub>21</sub>H<sub>16</sub>Cl<sub>2</sub>FO [M-H]<sup>-</sup> 373.0568; Found: 373.0546.

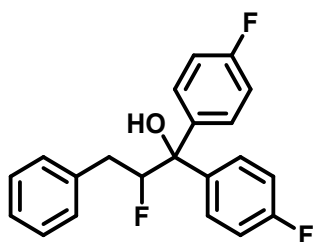

**3ac; 2-fluoro-1,1-bis(4-fluorophenyl)-3-phenylpropan-1-ol**

Prepared according to general procedure GP to afford **3ac** as a white waxy solid (195 mg, 95%) after column chromatography ( $R_f = 0.4$ , hexane/Et<sub>2</sub>O 9:1); IR (film)/cm<sup>-1</sup> 3585, 3065, 2936, 1897, 1604, 1505, 1233, 835; <sup>1</sup>H NMR (500 MHz, CDCl<sub>3</sub>)  $\delta$  7.51–7.48 (m, 2H, 2  $\times$  Ar–H), 7.41–7.38 (m, 2H, 2  $\times$  Ar–H), 7.30–7.22 (m, 3H, 3  $\times$  Ar–H), 7.13 (d,  $J = 7.3$  Hz, 2H, 2  $\times$  Ar–H), 7.05–7.00 (m, 4H, 4  $\times$  Ar–H), 5.47 (ddd,  $^2J_{(H-F)} = 47.1$  Hz,  $^3J_{(H-H)} = 9.9$ , 1.8 Hz, 1H, CHFCH<sub>2</sub>), 3.02–2.94 (m, 1H, PhCHHCHF), 2.72–2.60 (m, 2H, PhCHHCHF overlapping with O–H); <sup>13</sup>C NMR (125 MHz, CDCl<sub>3</sub>)  $\delta$  162.2 (d,  $^1J_{(C-F)} = 246.9$  Hz, Ar–C<sub>q</sub>), 162.1 (d,  $^1J_{(C-F)} = 247.0$  Hz, Ar–C<sub>q</sub>), 140.0 (d,  $^3J_{(C-F)} = 3.3$  Hz, Ar–C<sub>q</sub>), 138.9 (t,  $^3J_{(C-F)}$  and  $^4J_{(C-F)} = 3.5$  Hz, Ar–C<sub>q</sub>), 137.8 (Ar–C<sub>q</sub>), 129.3 (2  $\times$  Ar–C), 128.2 (d,  $^3J_{(C-F)} = 8.1$  Hz,  $^4J_{(C-F)} = 2.0$  Hz, 2  $\times$  Ar–C), 128.6 (2  $\times$  Ar–C), 127.9 (d,  $^3J_{(C-F)} = 8.1$  Hz, 2  $\times$  Ar–C), 126.8 (Ar–C), 115.6 (d,  $^2J_{(C-F)} = 21.4$  Hz, 2  $\times$  Ar–C), 115.3 (d,  $^2J_{(C-F)} = 21.3$  Hz, 2  $\times$  Ar–C), 96.9 (d,  $^1J_{(C-F)} = 182.1$  Hz, CHF), 78.7 (d,  $^2J_{(C-F)} = 21.1$  Hz, C<sub>q</sub>OHCHF), 35.7 (d,  $^2J_{(C-F)} = 21.4$  Hz, PhCH<sub>2</sub>CHF); <sup>19</sup>F NMR (470 MHz, CDCl<sub>3</sub>)  $\delta$  -114.7–114.8 (m, 1F, Ar–F), 114.8–114.9 (m, 1F, Ar–F), -186.3 (ddd,  $^2J_{(H-F)} = 47.1$  Hz,  $^3J_{(H-F)} = 41.9$ , 16.6 Hz, 1F, CHF); HRMS (ESI)  $m/z$  Calcd for C<sub>21</sub>H<sub>16</sub>F<sub>3</sub>O [M–H]<sup>-</sup> 341.1159; Found: 341.1177.

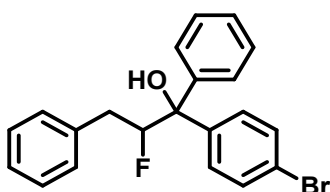

**3ad; 1-(4-bromophenyl)-2-fluoro-1,3-diphenylpropan-1-ol**

Prepared according to general procedure GP to afford **3ad** as a white waxy solid (dr = 50:50, 212 mg, 92%) after column chromatography ( $R_f = 0.3$ , hexane/Et<sub>2</sub>O 9:1); *Inseparable mixture of diastereoisomers*; IR (film)/cm<sup>-1</sup> 3564, 3062, 2966, 1953, 1603, 1487, 1397, 1071; <sup>1</sup>H NMR (500 MHz, CDCl<sub>3</sub>, *mixture of diastereoisomers*)  $\delta$  7.53–7.51 (m, 2H, 2  $\times$  Ar–H), 7.47–7.45 (m, 4H, 4  $\times$  Ar–H), 7.43–7.41 (m, 4H, 4  $\times$  Ar–H), 7.36–7.32 (m, 6H, 6  $\times$  Ar–H), 7.30–7.27 (m, 6H, 6  $\times$  Ar–H), 7.25–7.21 (m, 2H, 2  $\times$  Ar–H), 7.14 (d,  $J = 7.3$  Hz, 4H, 4  $\times$  Ar–H), 5.58–5.45 (m, 2H, 2  $\times$  CHFCH<sub>2</sub>), 3.08–2.94 (m, 2H, 2  $\times$  PhCHHCHF), 2.74–2.59 (m, 4H, 2  $\times$  PhCHHCHF overlapping with 2  $\times$  O–H); <sup>13</sup>C NMR (125 MHz, CDCl<sub>3</sub>, *mixture of diastereoisomers*)  $\delta$  144.0 (Ar–C<sub>q</sub>), 143.5 (Ar–C<sub>q</sub>), 142.6 (d,  $^3J_{(C-F)} = 3.9$  Hz, Ar–C<sub>q</sub>), 142.2 (d,  $^3J_{(C-F)} = 4.2$  Hz, Ar–C<sub>q</sub>), 138.0 (Ar–C<sub>q</sub>), 137.9 (Ar–C<sub>q</sub>), 131.7 (2  $\times$  Ar–C), 131.5 (2  $\times$  Ar–C), 129.4 (4  $\times$  Ar–C), 128.9 (Ar–C), 128.8 (3  $\times$  Ar–C), 128.6 (4  $\times$  Ar–C), 127.8 (6  $\times$  Ar–C), 126.8 (2  $\times$  Ar–C), 126.7 (2  $\times$  Ar–C), 125.9 (2  $\times$  Ar–C), 121.7 (2  $\times$  Ar–C<sub>q</sub>), 96.8 (d,  $^1J_{(C-F)} = 181.7$  Hz, CHF), 96.6 (d,  $^1J_{(C-F)} = 182.0$  Hz, CHF), 79.2 (d,  $^2J_{(C-F)} = 21.1$  Hz, C<sub>q</sub>OHCHF), 79.1 (d,  $^2J_{(C-F)} = 20.9$  Hz, C<sub>q</sub>OHCHF), 35.8 (d,  $^2J_{(C-F)} = 21.2$  Hz, PhCH<sub>2</sub>CHF), 35.7 (d,  $^2J_{(C-F)} = 21.5$  Hz, PhCH<sub>2</sub>CHF); <sup>19</sup>F NMR (470 MHz, CDCl<sub>3</sub>)  $\delta$  -187.0 – -187.3 (m, 2F, 2  $\times$  CHF); HRMS (ESI)  $m/z$  Calcd for C<sub>21</sub>H<sub>17</sub>BrFO [M–H]<sup>-</sup> 383.0452; Found: 383.0448.

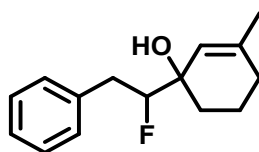

**3ae; 1-(1-fluoro-2-phenylethyl)-3-methylcyclohex-2-en-1-ol**

Prepared according to general procedure GP to afford **3ae** (dr = 80:20) obtained as a white waxy solid (dr = 71:29, 91 mg, 65%) after column chromatography ( $R_f = 0.5$ , hexane/Et<sub>2</sub>O 7:3); *Inseparable mixture of diastereoisomers*; IR (film)/cm<sup>-1</sup> 3583, 3418, 3029, 2931, 1947, 1670, 1454, 1063; <sup>1</sup>H NMR (500 MHz, CDCl<sub>3</sub>, mixture of diastereoisomers) δ 7.32–7.30 (m, 2H major + 0.8H minor, Ar–H), 7.27–7.22 (m, 3H major + 1.2H minor, Ar–H), 5.50 (s, 0.4H, CH), 5.42 (s, 1H, CH), 5.47–5.43 (m, 1H major + 0.4H minor, CHFCH<sub>2</sub>), 3.05–2.86 (m, 2H major + 0.8H minor, 2 × PhCHHCHF), 2.03–1.93 (m, 3H major + 1.2H minor, CH<sub>2</sub> overlapping with O–H), 1.82–1.71 (m, 7H major + 2.8H minor, 2 × CH<sub>2</sub> overlapping with CH<sub>3</sub>); <sup>13</sup>C NMR (125 MHz, CDCl<sub>3</sub>, mixture of diastereoisomers) δ 141.7 (d, <sup>4</sup>J<sub>(C-F)</sub> = 1.2 Hz Csp<sup>2</sup>CH<sub>3</sub>), 141.3 (d, <sup>4</sup>J<sub>(C-F)</sub> = 1.6 Hz Csp<sup>2</sup>CH<sub>3</sub>), 138.4 (Ar–C<sub>q</sub>), 138.3 (Ar–C<sub>q</sub>), 129.4 (2 × Ar–C), 129.3 (2 × Ar–C), 128.6 (2 × Ar–C), 128.5 (2 × Ar–C), 126.6 (Ar–C), 126.5 (Ar–C), 122.5 (d, <sup>3</sup>J<sub>(C-F)</sub> = 4.2 Hz Csp<sup>2</sup>COH), 122.1 (d, <sup>3</sup>J<sub>(C-F)</sub> = 6.4 Hz Csp<sup>2</sup>COH), 99.9 (d, <sup>1</sup>J<sub>(C-F)</sub> = 177.6 Hz, CHF), 98.5 (d, <sup>1</sup>J<sub>(C-F)</sub> = 178.5 Hz, CHF), 71.9 (d, <sup>2</sup>J<sub>(C-F)</sub> = 20.5 Hz, C<sub>q</sub>OHCHF), 71.5 (d, <sup>2</sup>J<sub>(C-F)</sub> = 19.5 Hz, C<sub>q</sub>OHCHF), 36.2 (d, <sup>2</sup>J<sub>(C-F)</sub> = 21.8 Hz, PhCH<sub>2</sub>CHF), 35.8 (d, <sup>2</sup>J<sub>(C-F)</sub> = 21.7 Hz, PhCH<sub>2</sub>CHF), 31.3 (d, <sup>3</sup>J = 3.2 Hz, CH<sub>2</sub>), 30.8 (d, <sup>3</sup>J = 3.2 Hz, CH<sub>2</sub>), 30.5 (CH<sub>2</sub>), 30.3 (CH<sub>2</sub>), 24.1 (2 × CH<sub>3</sub>), 18.9 (CH<sub>2</sub>), 18.6 (CH<sub>2</sub>); <sup>19</sup>F NMR (470 MHz, CDCl<sub>3</sub>) δ -190.4 – -190.6 (m, 1F major, CHF), -193.6 (ddd, <sup>2</sup>J<sub>(H-F)</sub> = 47.9 Hz, <sup>3</sup>J<sub>(H-F)</sub> = 40.5, 18.2 Hz, 0.4F minor, CHF); HRMS (ESI) m/z Calcd for C<sub>15</sub>H<sub>19</sub>FNao [M+Na]<sup>+</sup> 257.1312; Found: 257.1319.

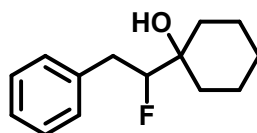

**3af; 1-(1-fluoro-2-phenylethyl)cyclohexan-1-ol**

Prepared according to general procedure GP to afford **3af** as a colorless waxy solid (93 mg, 70%) after column chromatography ( $R_f = 0.3$ , hexane/EtOAc 9:1); IR (film)/cm<sup>-1</sup> 3565, 3428, 3029, 2933, 1945, 1454, 1269, 975; <sup>1</sup>H NMR (500 MHz, CDCl<sub>3</sub>) δ 7.34–7.30 (m, 2H, 2 × Ar–H), 7.26–7.22 (m, 3H, 3 × Ar–H), 4.42 (ddd, <sup>2</sup>J<sub>(H-F)</sub> = 47.7 Hz, <sup>3</sup>J<sub>(H-H)</sub> = 8.3, 4.2 Hz, 1H, CHFCH<sub>2</sub>), 3.00–2.89 (m, 2H, 2 × PhCHHCHF), 1.78–1.46 (m, 9H, 4 × CH<sub>2</sub> overlapping with O–H), 1.34–1.25 (m, 2H, CH<sub>2</sub>); <sup>13</sup>C NMR (125 MHz, CDCl<sub>3</sub>) δ 138.4 (d, <sup>3</sup>J<sub>(C-F)</sub> = 1.1 Hz, Ar–C<sub>q</sub>), 129.4 (2 × Ar–C), 128.6 (2 × Ar–C), 126.6 (Ar–C), 99.8 (d, <sup>1</sup>J<sub>(C-F)</sub> = 175.5 Hz, CHF), 72.6 (d, <sup>2</sup>J<sub>(C-F)</sub> = 19.5 Hz, C<sub>q</sub>OHCHF), 37.6 (CH<sub>2</sub>), 35.5 (d, <sup>2</sup>J<sub>(C-F)</sub> = 21.9 Hz, PhCH<sub>2</sub>CHF), 33.4 (d, <sup>3</sup>J<sub>(C-F)</sub> = 4.1 Hz, CH<sub>2</sub>), 32.7 (d, <sup>3</sup>J<sub>(C-F)</sub> = 3.5 Hz, CH<sub>2</sub>), 25.8 (2 × CH<sub>2</sub>), 21.4 (2 × CH<sub>2</sub>); <sup>19</sup>F NMR (470 MHz, CDCl<sub>3</sub>) δ -193.6– -193.8 (m, 1F, CHF); HRMS (ESI) m/z Calcd for C<sub>14</sub>H<sub>18</sub>FO [M-H]<sup>-</sup> 221.1347; Found: 221.1351.

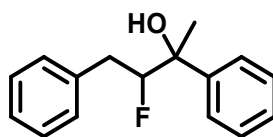

**3ag; 3-fluoro-2,4-diphenylbutan-2-ol**

Prepared according to general procedure GP to afford **3ag** as a colorless waxy solid (dr = 50:50, 110 mg, 75%) after column chromatography ( $R_f = 0.4$ , hexane/EtOAc 9:1); *Inseparable mixture of diastereoisomers*; IR (film)/cm<sup>-1</sup> 3565, 3433, 3029, 2978, 1953, 1447, 1069, 699; <sup>1</sup>H NMR (500 MHz, CDCl<sub>3</sub>, mixture of diastereoisomers) δ 7.54 (d,  $J = 7.4$  Hz, 2H, 2 × Ar–H), 7.50–7.48 (m, 2H, 2 × Ar–H), 7.40 (t,  $J = 7.8$  Hz, 4H, 4 × Ar–H), 7.34–7.31 (m, 2H, 2 × Ar–H), 7.27–7.17 (m, 6H, 6 × Ar–H overlapping with CDCl<sub>3</sub>), 7.14 (d,  $J = 7.4$  Hz, 2H, 2 × Ar–H), 7.09 (d,  $J = 7.3$  Hz, 2H, 2 × Ar–H), 4.82–4.70 (m, 2H, 2 × CHFCH<sub>2</sub>), 2.87–2.67 (m, 3H, 3 × PhCHHCHF), 2.55 (ddd, <sup>3</sup>J<sub>(H-F)</sub> = 42.3 Hz, <sup>2</sup>J<sub>(H-H)</sub> = 15.2 Hz, <sup>3</sup>J<sub>(H-H)</sub> = 1.5 Hz, 1H, PhCHHCHF), 2.33 (s, 1H, O–H), 2.20 (s, 1H, O–H), 1.69 (s, 6H, 2 × CH<sub>3</sub>); <sup>13</sup>C NMR (125 MHz, CDCl<sub>3</sub>, mixture of diastereoisomers) δ 143.6 (d, <sup>3</sup>J<sub>(C-F)</sub> = 4.5 Hz, Ar–C<sub>q</sub>), 143.4 (d, <sup>3</sup>J<sub>(C-F)</sub> = 2.0 Hz, Ar–C<sub>q</sub>), 138.3 (Ar–C<sub>q</sub>), 137.9 (Ar–C<sub>q</sub>), 129.2 (4 × Ar–C), 128.6 (4 × Ar–C), 128.5 (4 × Ar–C), 127.7 (Ar–C), 127.5 (Ar–C), 126.6 (Ar–C), 126.5 (Ar–C), 125.9 (2 × Ar–C), 125.1 (2 × Ar–C), 99.8 (d, <sup>1</sup>J<sub>(C-F)</sub> = 180.2 Hz, CHF), 99.7 (d, <sup>1</sup>J<sub>(C-F)</sub> = 180.4 Hz, CHF), 75.8 (d, <sup>2</sup>J<sub>(C-F)</sub> = 20.6 Hz, 2 × C<sub>q</sub>OHCHF), 36.4 (d, <sup>2</sup>J<sub>(C-F)</sub> = 21.4 Hz, PhCH<sub>2</sub>CHF), 35.7 (d, <sup>2</sup>J<sub>(C-F)</sub> = 21.6 Hz, PhCH<sub>2</sub>CHF), 27.4 (d, <sup>3</sup>J<sub>(C-F)</sub> = 4.0 Hz, CH<sub>3</sub>), 24.9 (d, <sup>3</sup>J<sub>(C-F)</sub> = 3.4

Hz, CH<sub>3</sub>); <sup>19</sup>F NMR (470 MHz, CDCl<sub>3</sub>) δ -187.8 (ddd, <sup>2</sup>J<sub>(H-F)</sub> = 48.0 Hz, <sup>3</sup>J<sub>(H-F)</sub> = 41.7, 17.5 Hz, 1F, CHF), -191.7 (ddd, <sup>2</sup>J<sub>(H-F)</sub> = 46.2 Hz, <sup>3</sup>J<sub>(H-F)</sub> = 42.3, 17.0 Hz, 1F, CHF); HRMS (ESI) m/z Calcd for C<sub>16</sub>H<sub>16</sub>FO [M-H]<sup>-</sup> 243.1191; Found: 243.1186.

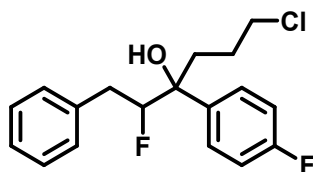

**3ah-major; 6-chloro-2-fluoro-3-(4-fluorophenyl)-1-phenylhexan-3-ol**

Prepared according to general procedure GP to afford **3ah-major** as a white waxy solid (105 mg, 90%) after column chromatography ( $R_f$  = 0.4, hexane/Et<sub>2</sub>O 8:2); IR (film)/cm<sup>-1</sup> 3430, 2919, 2850, 1645, 1510, 1225, 1094, 830; <sup>1</sup>H NMR (500 MHz, CDCl<sub>3</sub>) δ 7.43–7.39 (m, 2H, 2 × Ar-H), 7.26 (t,  $J$  = 7.2 Hz, 2H, 2 × Ar-H, overlapping with CDCl<sub>3</sub>), 7.22–7.19 (m, 1H, Ar-H), 7.12–7.08 (m, 2H, 2 × Ar-H), 7.06 (d,  $J$  = 7.2 Hz, 2H, 2 × Ar-H), 4.79 (ddd, <sup>2</sup>J<sub>(H-F)</sub> = 47.6 Hz, <sup>3</sup>J<sub>(H-H)</sub> = 10.0, 2.0 Hz, 1H, CHFCH<sub>2</sub>), 3.48 (t, <sup>3</sup>J<sub>(H-H)</sub> = 6.5 Hz, 2H, CH<sub>2</sub>Cl), 2.91 (ddd, <sup>3</sup>J<sub>(H-F)</sub> = 17.3 Hz, <sup>2</sup>J<sub>(H-H)</sub> = 15.2 Hz, <sup>3</sup>J<sub>(H-H)</sub> = 10.0 Hz, 1H, PhCHHCHF), 2.45 (ddd, <sup>3</sup>J<sub>(H-F)</sub> = 41.3 Hz, <sup>2</sup>J<sub>(H-H)</sub> = 15.2 Hz, <sup>3</sup>J<sub>(H-H)</sub> = 2.0 Hz, 1H, PhCHHCHF), 2.28–2.20 (m, 2H, CHHCOH overlapping with O-H), 2.11–2.05 (m, 1H, CHHCOH), 1.87–1.79 (m, 1H, CHHCH<sub>2</sub>Cl), 1.49–1.41 (m, 1H, CHHCH<sub>2</sub>Cl); <sup>13</sup>C NMR (125 MHz, CDCl<sub>3</sub>) δ 162.1 (d, <sup>1</sup>J<sub>(C-F)</sub> = 246.5 Hz, Ar-C<sub>q</sub>), 137.8 (Ar-C<sub>q</sub>), 136.4 (dd, <sup>3</sup>J<sub>(C-F)</sub> = 4.8 Hz, <sup>4</sup>J<sub>(C-F)</sub> = 3.3 Hz, Ar-C<sub>q</sub>), 129.2 (2 × Ar-C), 128.5 (2 × Ar-C), 127.3 (d, <sup>3</sup>J<sub>(C-F)</sub> = 8.0 Hz, 2 × Ar-C), 126.6 (Ar-C), 115.7 (d, <sup>2</sup>J<sub>(C-F)</sub> = 21.3 Hz, 2 × Ar-C), 99.8 (d, <sup>1</sup>J<sub>(C-F)</sub> = 180.3 Hz, CHF), 77.8 (d, <sup>2</sup>J<sub>(C-F)</sub> = 19.7 Hz, C<sub>q</sub>OHCHF), 45.4 (CH<sub>2</sub>Cl), 36.7 (d, <sup>3</sup>J<sub>(C-F)</sub> = 3.4 Hz, CH<sub>2</sub>COH), 35.5 (d, <sup>2</sup>J<sub>(C-F)</sub> = 21.7 Hz, PhCH<sub>2</sub>CHF), 26.6 (CH<sub>2</sub>CH<sub>2</sub>Cl); <sup>19</sup>F NMR (470 MHz, CDCl<sub>3</sub>) δ -115.2 – -115.1 (m, 1F, Ar-F), -191.5 (ddd, <sup>2</sup>J<sub>(H-F)</sub> = 47.6 Hz, <sup>3</sup>J<sub>(H-F)</sub> = 41.3, 17.3 Hz, 1F, CHF); HRMS (ESI) m/z Calcd for C<sub>18</sub>H<sub>19</sub>Cl<sub>2</sub>F<sub>2</sub> [M+Cl]<sup>-</sup> 359.0787; Found: 359.0784.

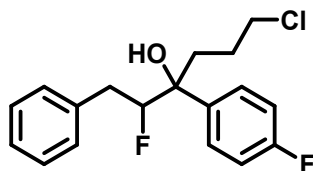

**3ah-minor; 6-chloro-2-fluoro-3-(4-fluorophenyl)-1-phenylhexan-3-ol**

Prepared according to general procedure GP to afford **3ah-minor** as a white waxy solid (70 mg, 90%) after column chromatography ( $R_f$  = 0.3, hexane/Et<sub>2</sub>O 8:2); IR (film)/cm<sup>-1</sup> 3434, 2918, 2850, 1645, 1506, 1455, 1226, 1063; <sup>1</sup>H NMR (500 MHz, CDCl<sub>3</sub>) δ 7.50–7.47 (m, 2H, 2 × Ar-H), 7.29 (t,  $J$  = 7.3 Hz, 2H, 2 × Ar-H), 7.23 (t,  $J$  = 7.3 Hz, 1H, Ar-H), 7.15 (d,  $J$  = 7.4 Hz, 2H, 2 × Ar-H), 7.11–7.08 (m, 2H, 2 × Ar-H), 4.70 (ddd, <sup>2</sup>J<sub>(H-F)</sub> = 47.7 Hz, <sup>3</sup>J<sub>(H-H)</sub> = 10.0, 2.2 Hz, 1H, CHFCH<sub>2</sub>), 3.55–3.52 (m, 2H, CH<sub>2</sub>Cl), 2.90 (ddd, <sup>3</sup>J<sub>(H-F)</sub> = 41.4 Hz, <sup>2</sup>J<sub>(H-H)</sub> = 14.8 Hz, <sup>3</sup>J<sub>(H-H)</sub> = 2.2 Hz, 1H, PhCHHCHF), 2.67 (ddd, <sup>3</sup>J<sub>(H-F)</sub> = 16.8 Hz, <sup>2</sup>J<sub>(H-H)</sub> = 14.8 Hz, <sup>3</sup>J<sub>(H-H)</sub> = 10.0 Hz, 1H, PhCHHCHF), 2.30–2.24 (m, 1H, CHHCOH), 2.22 (d, <sup>4</sup>J<sub>(H-F)</sub> = 1.1 Hz, 1H, O-H), 2.08–2.02 (m, 1H, CHHCOH), 1.92–1.84 (m, 1H, CHHCH<sub>2</sub>Cl), 1.63–1.54 (m, 1H, CHHCH<sub>2</sub>Cl); <sup>13</sup>C NMR (125 MHz, CDCl<sub>3</sub>) δ 162.3 (d, <sup>1</sup>J<sub>(C-F)</sub> = 246.4 Hz, Ar-C<sub>q</sub>), 137.6 (d, <sup>4</sup>J<sub>(C-F)</sub> = 0.6 Hz, Ar-C<sub>q</sub>), 136.9 (d, <sup>3</sup>J<sub>(C-F)</sub> = 3.2 Hz, Ar-C<sub>q</sub>), 129.3 (2 × Ar-C), 128.6 (2 × Ar-C), 128.1 (dd, <sup>3</sup>J<sub>(C-F)</sub> = 8.0 Hz, <sup>4</sup>J<sub>(C-F)</sub> = 1.8 Hz, 2 × Ar-C), 126.8 (Ar-C), 115.4 (d, <sup>2</sup>J<sub>(C-F)</sub> = 21.3 Hz, 2 × Ar-C), 99.3 (d, <sup>1</sup>J<sub>(C-F)</sub> = 181.0 Hz, CHF), 77.5 (d, <sup>2</sup>J<sub>(C-F)</sub> = 20.4 Hz, C<sub>q</sub>OHCHF overlapping with CDCl<sub>3</sub>), 45.4 (CH<sub>2</sub>Cl), 36.1 (d, <sup>2</sup>J<sub>(C-F)</sub> = 21.4 Hz, PhCH<sub>2</sub>CHF), 34.8 (d, <sup>3</sup>J<sub>(C-F)</sub> = 2.8 Hz, CH<sub>2</sub>COH), 26.5 (CH<sub>2</sub>CH<sub>2</sub>Cl); <sup>19</sup>F NMR (470 MHz, CDCl<sub>3</sub>) δ -115.3 (tt, <sup>3</sup>J<sub>(H-F)</sub> = 8.7 Hz, <sup>4</sup>J<sub>(H-F)</sub> = 5.4, 1F, Ar-F), -186.8 (ddd, <sup>2</sup>J<sub>(H-F)</sub> = 47.7 Hz, <sup>3</sup>J<sub>(H-F)</sub> = 41.4, 16.8 Hz, 1F, CHF); HRMS (ESI) m/z Calcd for C<sub>18</sub>H<sub>19</sub>Cl<sub>2</sub>F<sub>2</sub> [M+Cl]<sup>-</sup> 359.0787; Found: 359.0787.

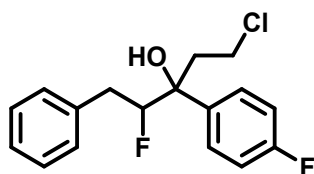

**3ai-major; 5-chloro-2-fluoro-3-(4-fluorophenyl)-1-phenylpentan-3-ol**

Prepared according to general procedure GP to afford **3ai-major** as a yellow waxy solid (100 mg, 90%) after column chromatography ( $R_f = 0.5$ , hexane/Et<sub>2</sub>O 9:1); IR (film)/cm<sup>-1</sup> 3564, 3065, 2964, 1899, 1513, 1228, 1010, 835; <sup>1</sup>H NMR (500 MHz, CDCl<sub>3</sub>) δ 7.43–7.39 (m, 2H, 2 × Ar–H), 7.26–7.23 (m, 2H, 2 × Ar–H), 7.21–7.18 (m, 1H, Ar–H), 7.13–7.08 (m, 2H, 2 × Ar–H), 7.04 (d,  $J = 7.3$  Hz, 2H, 2 × Ar–H), 4.76 (ddd,  $^2J_{(H-F)} = 47.5$  Hz,  $^3J_{(H-H)} = 9.9$ , 2.1 Hz, 1H, CHFCH<sub>2</sub>), 3.52 (dt,  $^2J = 10.5$  Hz,  $^3J = 5.9$  Hz, 1H, CHHCl), 3.19 (dt,  $^2J = 10.5$  Hz,  $^3J = 5.2$  Hz, 1H, CHHCl), 2.89 (ddd,  $^3J_{(H-F)} = 17.4$  Hz,  $^2J_{(H-H)} = 15.2$  Hz,  $^3J_{(H-H)} = 9.9$  Hz, 1H, PhCHHCHF), 2.66–2.59 (m, 1H, CHHCH<sub>2</sub>Cl), 2.49–2.37 (m, 3H, PhCHHCHF overlapping with O–H and CHHCH<sub>2</sub>Cl); <sup>13</sup>C NMR (125 MHz, CDCl<sub>3</sub>) δ 163.2 (d,  $^1J_{(C-F)} = 247.1$  Hz, Ar–C<sub>q</sub>), 137.5 (d,  $^3J_{(C-F)} = 0.5$  Hz, Ar–C<sub>q</sub>), 135.6 (dd,  $^3J_{(C-F)} = 4.8$  Hz,  $^4J_{(C-F)} = 3.3$  Hz, Ar–C<sub>q</sub>), 129.2 (2 × Ar–C), 128.6 (2 × Ar–C), 127.2 (d,  $^3J_{(C-F)} = 8.0$  Hz, 2 × Ar–C), 126.7 (Ar–C), 115.9 (d,  $^2J_{(C-F)} = 21.4$  Hz, 2 × Ar–C), 99.4 (d,  $^1J_{(C-F)} = 181.2$  Hz, CHF), 77.6 (d,  $^2J_{(C-F)} = 19.8$  Hz, C<sub>q</sub>OHCHF), 42.4 (d,  $^3J_{(C-F)} = 3.7$  Hz, CH<sub>2</sub>CH<sub>2</sub>Cl), 39.7 (CH<sub>2</sub>Cl), 35.2 (d,  $^2J_{(C-F)} = 21.7$  Hz, PhCH<sub>2</sub>CHF); <sup>19</sup>F NMR (470 MHz, CDCl<sub>3</sub>) δ -114.5 (tt,  $^3J_{(H-F)} = 8.6$  Hz,  $^4J_{(H-F)} = 5.4$ , 1F, Ar–F), -191.3 (ddd,  $^2J_{(H-F)} = 47.4$  Hz,  $^3J_{(H-F)} = 41.2$ , 17.4 Hz, 1F, CHF); HRMS (ESI) m/z Calcd for C<sub>17</sub>H<sub>16</sub>ClF<sub>2</sub>O [M–H]<sup>-</sup> 309.0863; Found: 309.0861.

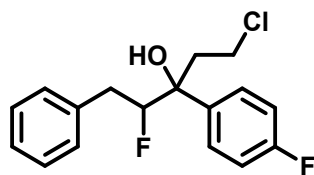

**3ai-minor; 5-chloro-2-fluoro-3-(4-fluorophenyl)-1-phenylpentan-3-ol**

Prepared according to general procedure GP to afford **3ai-minor** as a yellow waxy solid (67 mg, 90%) after column chromatography ( $R_f = 0.4$ , hexane/Et<sub>2</sub>O 9:1); IR (film)/cm<sup>-1</sup> 3564, 3087, 2966, 1898, 1604, 1228, 1067, 837; <sup>1</sup>H NMR (500 MHz, CDCl<sub>3</sub>) δ 7.51–7.49 (m, 2H, 2 × Ar–H), 7.30–7.27 (m, 2H, 2 × Ar–H), 7.25–7.21 (m, 1H, Ar–H), 7.15–7.09 (m, 4H, 4 × Ar–H), 4.69 (ddd,  $^2J_{(H-F)} = 47.8$  Hz,  $^3J_{(H-H)} = 10.0$ , 2.1 Hz, 1H, CHFCH<sub>2</sub>), 3.57 (ddd,  $^2J = 11.0$  Hz,  $^3J = 8.5$ , 6.9 Hz, 1H, CHHCl), 3.42 (ddd,  $^2J = 11.0$  Hz,  $^3J = 8.7$ , 5.4 Hz, 1H, CHHCl), 2.89 (ddd,  $^3J_{(H-F)} = 41.9$  Hz,  $^2J_{(H-H)} = 14.9$  Hz,  $^3J_{(H-H)} = 2.1$  Hz, 1H, PhCHHCHF), 2.71 (s, 1H, O–H), 2.66–2.60 (m, 1H, CHHCH<sub>2</sub>Cl), 2.58–2.51 (m, 1H, PhCHHCHF), 2.46–2.40 (m, 1H, CHHCH<sub>2</sub>Cl); <sup>13</sup>C NMR (125 MHz, CDCl<sub>3</sub>) δ 162.5 (d,  $^1J_{(C-F)} = 246.9$  Hz, Ar–C<sub>q</sub>), 137.4 (d,  $^3J_{(C-F)} = 0.7$  Hz, Ar–C<sub>q</sub>), 135.9 (d,  $^3J_{(C-F)} = 3.1$  Hz, Ar–C<sub>q</sub>), 129.3 (2 × Ar–C), 128.7 (2 × Ar–C), 128.1 (2 × d,  $^3J_{(C-F)} = 8.0$  Hz, 2 × Ar–C), 126.8 (Ar–C), 115.5 (d,  $^2J_{(C-F)} = 21.3$  Hz, 2 × Ar–C), 98.9 (d,  $^1J_{(C-F)} = 181.8$  Hz, CHF), 77.5 (d,  $^2J_{(C-F)} = 21.3$  Hz, C<sub>q</sub>OHCHF), 40.3 (d,  $^3J_{(C-F)} = 3.2$  Hz, CH<sub>2</sub>CH<sub>2</sub>Cl), 40.2 (CH<sub>2</sub>Cl), 35.9 (d,  $^2J_{(C-F)} = 21.1$  Hz, PhCH<sub>2</sub>CHF); <sup>19</sup>F NMR (470 MHz, CDCl<sub>3</sub>) δ -114.8 – -114.7 (m, 1F, Ar–F), -186.7 (ddd,  $^2J_{(H-F)} = 47.8$  Hz,  $^3J_{(H-F)} = 41.9$ , 17.0 Hz, 1F, CHF); HRMS (ESI) m/z Calcd for C<sub>17</sub>H<sub>16</sub>ClF<sub>2</sub>O [M–H]<sup>-</sup> 309.0863; Found: 309.0898.

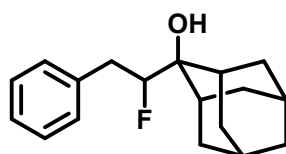

**3aj; 2-(1-fluoro-2-phenylethyl)adamantan-2-ol**

Prepared according to general procedure GP to afford **3aj** as a white waxy solid (98 mg, 60%) after column chromatography ( $R_f$  = 0.6, hexane/EtOAc 9:1); IR (film)/ $\text{cm}^{-1}$  3435, 3065, 2916, 2860, 1638, 1455, 1331, 699;  $^1\text{H}$  NMR (500 MHz,  $\text{CDCl}_3$ )  $\delta$  7.34–7.31 (m, 2H, 2  $\times$  Ar–H), 7.27–7.23 (m, 3H, 2  $\times$  Ar–H overlapping with  $\text{CDCl}_3$ ), 5.19 (ddd,  $^2J_{(\text{H-F})} = 47.6$  Hz,  $^3J_{(\text{H-H})} = 10.3$ , 2.1 Hz, 1H,  $\text{CHFCH}_2$ ), 3.07 (td,  $^2J_{(\text{H-H})} = 15.0$  Hz,  $^3J_{(\text{H-H})} = 10.3$  Hz, 1H,  $\text{PhCHHCHF}$ ), 2.86 (ddd,  $^3J_{(\text{H-F})} = 42.9$  Hz,  $^2J_{(\text{H-H})} = 14.9$ , 2.1 Hz, 1H,  $\text{PhCHHCHF}$ ), 2.30 (d,  $J = 12.4$  Hz, 1H, CH), 2.24 (d,  $J = 12.4$  Hz, 1H, CH), 2.06 (s, 1H, CH), 1.94 (s, 2H, CH overlapping with O–H) 1.88–1.85 (m, 2H, 2  $\times$  CH), 1.79–1.70 (m, 6H, 3  $\times$   $\text{CH}_2$ ), 1.63–1.56 (m, 2H,  $\text{CH}_2$ );  $^{13}\text{C}$  NMR (125 MHz,  $\text{CDCl}_3$ )  $\delta$  138.6 (d,  $^3J_{(\text{C-F})} = 0.9$  Hz, Ar– $\text{C}_q$ ), 129.5 (2  $\times$  Ar–C), 128.6 (2  $\times$  Ar–C), 126.6 (Ar–C), 95.5 (d,  $^1J_{(\text{C-F})} = 171.5$  Hz, CHF), 75.8 (d,  $^2J_{(\text{C-F})} = 18.6$  Hz,  $\text{COHCHF}$ ), 38.2 ( $\text{CH}_2$ ), 34.6 (d,  $^2J_{(\text{C-F})} = 21.7$  Hz,  $\text{PhCH}_2\text{CHF}$ ), 34.2 ( $\text{CH}_2$ ), 33.7 ( $\text{CH}_2$ ), 33.6 (d,  $^3J_{(\text{C-F})} = 4.8$  Hz,  $\text{CHCOH}$ ), 32.9 (d,  $^3J_{(\text{C-F})} = 1.5$  Hz,  $\text{CHCOH}$ ), 32.7 ( $\text{CH}_2$ ), 27.2 (CH), 27.1 (CH);  $^{19}\text{F}$  NMR (470 MHz,  $\text{CDCl}_3$ )  $\delta$  -201.2 – -201.0 (m, 1F, CHF); HRMS (ESI)  $m/z$  Calcd for  $\text{C}_{18}\text{H}_{23}\text{FNaO}$  [ $\text{M}+\text{Na}$ ] $^+$  297.1625; Found: 297.1634.

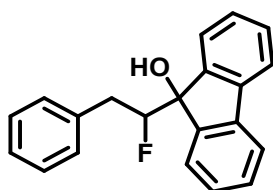

**3aj; 9-(1-fluoro-2-phenylethyl)-9H-fluoren-9-ol**

Prepared according to general procedure GP to afford **3al** as a white waxy solid (116 mg, 64%) after column chromatography ( $R_f$  = 0.3, hexane/Et $_2$ O 8:2); IR (film)/ $\text{cm}^{-1}$  3524, 3392, 3063, 2924, 2852, 1607, 1451, 1064;  $^1\text{H}$  NMR (500 MHz,  $\text{CDCl}_3$ )  $\delta$  7.72–7.67 (m, 2H, 2  $\times$  Ar–H), 7.52 (d,  $J = 7.5$  Hz, 1H, Ar–H), 7.46–7.41 (m, 2H, 2  $\times$  Ar–H), 7.40–7.31 (m, 3H, 3  $\times$  Ar–H), 7.22–7.19 (m, 2H, 2  $\times$  Ar–H), 7.17–7.14 (m, 1H, 1  $\times$  Ar–H), 6.99 (d,  $J = 7.2$  Hz, 2H, 2  $\times$  Ar–H), 5.20 (ddd,  $^2J_{(\text{H-F})} = 48.9$  Hz,  $^3J_{(\text{H-H})} = 9.8$ , 2.2 Hz, 1H,  $\text{CHFCH}_2$ ), 2.88 (s, 1H, O–H), 2.44 (ddd,  $^3J_{(\text{H-F})} = 17.6$  Hz,  $^2J_{(\text{H-H})} = 15.0$  Hz,  $^3J_{(\text{H-H})} = 9.8$  Hz, 1H,  $\text{PhCHHCHF}$ ), 2.31 (ddd,  $^3J_{(\text{H-F})} = 40.1$  Hz,  $^2J_{(\text{H-H})} = 15.0$ ,  $^3J_{(\text{H-H})} = 2.2$  Hz, 1H,  $\text{PhCHHCHF}$ );  $^{13}\text{C}$  NMR (125 MHz,  $\text{CDCl}_3$ )  $\delta$  144.9 (Ar– $\text{C}_q$ ), 144.8 (d,  $^3J_{(\text{C-F})} = 5.5$  Hz, Ar– $\text{C}_q$ ), 140.6 (d,  $^3J_{(\text{C-F})} = 2.8$  Hz, 2  $\times$  Ar– $\text{C}_q$ ), 137.5 (Ar– $\text{C}_q$ ), 130.1 (Ar–C), 129.7 (Ar–C), 129.1 (2  $\times$  Ar–C), 128.5 (2  $\times$  Ar–C), 128.4 (2  $\times$  Ar–C), 126.6 (Ar–C), 125.5 (d,  $^4J_{(\text{C-F})} = 3.2$  Hz, Ar–C), 124.2 (Ar–C), 120.5 (Ar–C), 120.4 (Ar–C), 98.9 (d,  $^1J_{(\text{C-F})} = 182.5$  Hz, CHF), 83.5 (d,  $^2J_{(\text{C-F})} = 19.3$  Hz,  $\text{C}_q\text{OHCHF}$ ), 36.3 (d,  $^2J_{(\text{C-F})} = 21.1$  Hz,  $\text{PhCH}_2\text{CHF}$ );  $^{19}\text{F}$  NMR (470 MHz,  $\text{CDCl}_3$ )  $\delta$  -191.1 (ddd,  $^2J_{(\text{H-F})} = 48.9$  Hz,  $^3J_{(\text{H-F})} = 40.1$ , 17.6 Hz, 1F, CHF); HRMS (ESI)  $m/z$  Calcd for  $\text{C}_{21}\text{H}_{17}\text{FNaO}$  [ $\text{M}+\text{Na}$ ] $^+$  327.1161; Found: 327.1159.

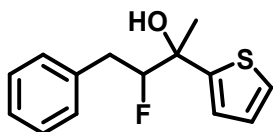

**3am-A; 3-fluoro-4-phenyl-2-(thiophen-2-yl)butan-2-ol**

Prepared according to general procedure GP to afford **3am-A** as a yellow waxy solid (66 mg, 89%) after column chromatography ( $R_f$  = 0.45, hexane/Et $_2$ O 8:2); IR (film)/ $\text{cm}^{-1}$  3583, 3026, 2924, 1496, 1454, 1237, 697;  $^1\text{H}$  NMR (500 MHz,  $\text{CDCl}_3$ )  $\delta$  7.28–7.26 (m, 3H, 3  $\times$  Ar–H overlapping with  $\text{CDCl}_3$ ), 7.23–7.20 (m, 1H, Ar–H), 7.17 (d,  $J = 6.8$  Hz, 2H, 2  $\times$  Ar–H), 7.04–7.01 (m, 2H, 2  $\times$  Ar–H), 4.71 (ddd,  $^2J_{(\text{H-F})} = 47.7$  Hz,  $^3J_{(\text{H-H})} = 10.1$ , 2.0 Hz, 1H,  $\text{CHFCH}_2$ ), 2.99–2.91 (m, 1H,  $\text{CHHCHF}$ ), 2.85–2.74 (m, 1H,  $\text{CHHCHF}$ ), 2.42 (d,  $^4J_{(\text{H-F})} = 1.5$  Hz, 1H, O–H), 1.75–1.74 (m, 3H,  $\text{CH}_3$ );  $^{13}\text{C}$  NMR (125 MHz,  $\text{CDCl}_3$ )  $\delta$  147.9 (d,  $^3J_{(\text{C-F})} = 4.2$  Hz, Ar– $\text{C}_q$ ), 137.8 (Ar– $\text{C}_q$ ), 129.1 (2  $\times$  Ar–C), 128.4 (2  $\times$  Ar–C), 127.1 (Ar–C), 126.5 (Ar–C), 124.7 (Ar–C), 123.4 (Ar–C), 99.3 (d,  $^1J_{(\text{C-F})} = 182.2$  Hz, CHF), 75.2 (d,  $^2J_{(\text{C-F})} = 21.7$  Hz,  $\text{C}_q\text{OHCHF}$ ), 35.8 (d,  $^2J_{(\text{C-F})} = 21.5$  Hz,  $\text{PhCH}_2\text{CHF}$ ), 27.3 (d,  $^3J_{(\text{C-F})} = 3.4$  Hz,  $\text{CH}_3$ );  $^{19}\text{F}$  NMR (470 MHz,  $\text{CDCl}_3$ ) -188.3 (ddd,  $^2J_{(\text{H-F})} = 47.7$  Hz,  $^3J_{(\text{H-F})} = 42.3$ , 17.4 Hz, 1F, CHF); HRMS (ESI)  $m/z$  Calcd for  $\text{C}_{14}\text{H}_{14}\text{FOS}$  [ $\text{M-H}$ ] $^-$  249.0755; Found: 249.0750.

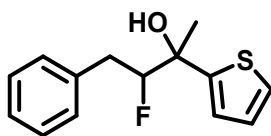

**3am-B; 3-fluoro-4-phenyl-2-(thiophen-2-yl)butan-2-ol**

Prepared according to general procedure GP to afford **3am-B** as a yellow waxy solid (66 mg, 89%) after column chromatography ( $R_f = 0.4$ , hexane/Et<sub>2</sub>O 8:2); IR (film)/cm<sup>-1</sup> 3419, 3030, 2917, 2849, 1604, 1455, 1265, 851; <sup>1</sup>H NMR (500 MHz, CDCl<sub>3</sub>) δ 7.31–7.27 (m, 3H, 3 × Ar-H), 7.24–7.21 (m, 1H, Ar-H), 7.17 (d,  $J = 7.3$  Hz, 2H, 2 × Ar-H), 7.07 (dd,  $^3J = 3.5$  Hz,  $^4J = 0.9$  Hz, 1H, Ar-H), 7.03 (dd,  $^3J = 5.0$ , 3.5 Hz, 1H, Ar-H), 4.74 (ddd,  $^2J_{(H-F)} = 48.3$  Hz,  $^3J_{(H-H)} = 10.0$ , 2.0 Hz, 1H, CHFCH<sub>2</sub>), 2.94–2.72 (m, 2H, 2 × CHHCHF), 2.58 (d,  $^4J_{(H-F)} = 1.5$  Hz, 1H, O-H), 1.75 (d,  $^4J_{(H-F)} = 1.6$  Hz, 3H, CH<sub>3</sub>); <sup>13</sup>C NMR (125 MHz, CDCl<sub>3</sub>) δ 147.7 (d,  $^3J_{(C-F)} = 2.4$  Hz, Ar-C<sub>q</sub>), 137.7 (Ar-C<sub>q</sub>), 129.3 (2 × Ar-C), 128.6 (2 × Ar-C), 127.1 (Ar-C), 126.7 (Ar-C), 125.3 (Ar-C), 124.4 (d,  $^4J_{(C-F)} = 1.4$  Hz, Ar-C), 99.7 (d,  $^1J_{(C-F)} = 181.4$  Hz, CHF), 75.1 (d,  $^2J_{(C-F)} = 22.1$  Hz, C<sub>q</sub>OHCHF), 36.5 (d,  $^2J_{(C-F)} = 21.2$  Hz, PhCH<sub>2</sub>CHF), 25.2 (d,  $^3J_{(C-F)} = 3.0$  Hz, CH<sub>3</sub>); <sup>19</sup>F NMR (470 MHz, CDCl<sub>3</sub>) -187.2 (ddd,  $^2J_{(H-F)} = 48.3$  Hz,  $^3J_{(H-F)} = 41.3$ , 17.8 Hz, 1F, CHF); HRMS (ESI)  $m/z$  Calcd for C<sub>14</sub>H<sub>15</sub>FNaOS [M+Na]<sup>+</sup> 273.0725; Found: 273.0723.

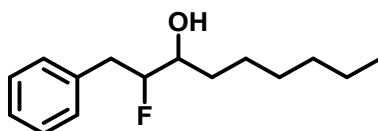

**3an-A; 2-fluoro-1-phenylnonan-3-ol**

Prepared according to general procedure GP to afford **3an-A** as (47 mg, 66%) after column chromatography ( $R_f = 0.3$ , hexane/EtOAc 95:5); IR (film)/cm<sup>-1</sup> 3400, 3064, 2928, 2857, 1605, 1455, 1060, 699; <sup>1</sup>H NMR (500 MHz, CDCl<sub>3</sub>) δ 7.32–7.30 (m, 2H, 2 × Ar-H), 7.26–7.23 (m, 3H, 2 × Ar-H overlapping with CDCl<sub>3</sub>), 4.55 (dddd,  $^2J_{(H-F)} = 47.8$  Hz,  $^3J_{(H-H)} = 7.9$ , 5.3, 3.8 Hz, 1H, CHFCH<sub>2</sub>), 3.61–3.52 (m, 1H, CHOH), 3.09–2.95 (m, 2H, 2 × PhCHHCHF), 1.77 (d,  $^3J_{(H-H)} = 6.5$  Hz, 1H, O-H), 1.58–1.46 (m, 4H, 2 × CH<sub>2</sub>), 1.37–1.26 (m, 6H, 3 × CH<sub>2</sub>), 0.88 (t,  $^3J_{(H-H)} = 6.9$  Hz, 3H, CH<sub>3</sub>); <sup>13</sup>C NMR (125 MHz, CDCl<sub>3</sub>) δ 137.1 (d,  $^3J_{(C-F)} = 5.2$  Hz, Ar-C<sub>q</sub>), 129.5 (2 × Ar-C), 128.7 (2 × Ar-C), 126.8 (Ar-C), 96.4 (d,  $^1J_{(C-F)} = 173.9$  Hz, CHF), 72.2 (d,  $^2J_{(C-F)} = 19.5$  Hz, COHCHF), 37.8 (d,  $^2J_{(C-F)} = 21.9$  Hz, PhCH<sub>2</sub>CHF), 33.3 (d,  $^3J_{(C-F)} = 4.0$  Hz, CH<sub>2</sub>CHOH), 31.9 (CH<sub>2</sub>), 29.4 (CH<sub>2</sub>), 25.6 (CH<sub>2</sub>), 22.7 (CH<sub>2</sub>), 14.2 (CH<sub>3</sub>); <sup>19</sup>F NMR (470 MHz, CDCl<sub>3</sub>) δ -195.0 – -194.7 (m, 1F, CHF); HRMS (ESI)  $m/z$  Calcd for C<sub>15</sub>H<sub>23</sub>FNaO [M+Na]<sup>+</sup> 261.1631; Found: 261.1623.

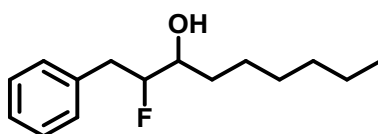

**3an-B; 2-fluoro-1-phenylnonan-3-ol**

Prepared according to general procedure GP to afford **3an-B** as (47 mg, 66%) after column chromatography ( $R_f = 0.2$ , hexane/Et<sub>2</sub>O 95:5); IR (film)/cm<sup>-1</sup> 3584, 3402, 3065, 2926, 2857, 1497, 1455, 1061, 699; <sup>1</sup>H NMR (500 MHz, CDCl<sub>3</sub>) δ 7.33–7.30 (m, 2H, 2 × Ar-H), 7.26–7.23 (m, 3H, 2 × Ar-H overlapping with CDCl<sub>3</sub>), 4.66–4.53 (m, 1H, CHFCH<sub>2</sub>), 3.80–3.76 (m, 1H, CHOH), 3.07–2.88 (m, 2H, 2 × PhCHHCHF), 1.78 (d,  $^3J_{(H-H)} = 5.1$  Hz, 1H, O-H), 1.62–1.47 (m, 4H, 2 × CH<sub>2</sub>), 1.34–1.30 (m, 6H, 3 × CH<sub>2</sub>), 0.88 (t,  $^3J_{(H-H)} = 6.9$  Hz, 3H, CH<sub>3</sub>); <sup>13</sup>C NMR (125 MHz, CDCl<sub>3</sub>) δ 137.5 (d,  $^3J_{(C-F)} = 2.2$  Hz, Ar-C<sub>q</sub>), 129.4 (2 × Ar-C), 128.6 (2 × Ar-C), 126.7 (Ar-C), 96.8 (d,  $^1J_{(C-F)} = 173.1$  Hz, CHF), 72.8 (d,  $^2J_{(C-F)} = 22.1$  Hz, COHCHF), 36.4 (d,  $^2J_{(C-F)} = 21.3$  Hz, PhCH<sub>2</sub>CHF), 32.1 (d,  $^3J_{(C-F)} = 5.2$  Hz, CH<sub>2</sub>CHOH), 31.9 (CH<sub>2</sub>), 29.4 (CH<sub>2</sub>), 25.7 (CH<sub>2</sub>), 22.7 (CH<sub>2</sub>), 14.2 (CH<sub>3</sub>); <sup>19</sup>F NMR (470 MHz, CDCl<sub>3</sub>) δ -188.5 – -188.2 (m, 1F, CHF); HRMS (ESI)  $m/z$  Calcd for C<sub>15</sub>H<sub>23</sub>FNaO [M+Na]<sup>+</sup> 261.1631; Found: 261.1613.



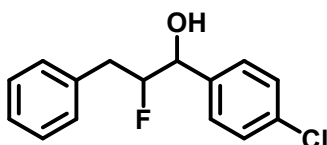

**3ap; 1-(4-chlorophenyl)-2-fluoro-3-phenylpropan-1-ol**

Prepared according to general procedure GP to afford **3ap** (dr = 50:50, 119 mg, 75%) obtained as a white waxy solid after column chromatography ( $R_f$  = 0.3, hexane/Et<sub>2</sub>O 9:1); *Inseparable mixture of diastereoisomers* dr = 77:23; IR (film)/cm<sup>-1</sup> 3396, 3031, 2922, 2850, 1600, 1493, 1455, 1090, 699; <sup>1</sup>H NMR (500 MHz, CDCl<sub>3</sub>, *mixture of diastereoisomers*) δ 7.37–7.22 (m overlapping CDCl<sub>3</sub>, 7H major + 2.1H minor, Ar–H), 7.18–7.16 (m, 2H major + 0.6H minor, Ar–H), 4.89–4.64 (m, 2H major + 0.6H minor, CHFCH<sub>2</sub> overlapping with CHOH), 2.99 (ddd, <sup>3</sup>J<sub>(H-F)</sub> = 19.2 Hz, <sup>2</sup>J<sub>(H-H)</sub> = 14.7 Hz <sup>3</sup>J<sub>(H-H)</sub> = 8.7 Hz, 0.3H minor, PhCHHCHF), 2.90–2.77 (m, 2H major + 0.3H minor, PhCHHCHF), 2.53 (s, 1H major, O–H), 2.29 (s, 0.3H minor, O–H); <sup>13</sup>C NMR (125 MHz, CDCl<sub>3</sub>, *mixture of diastereoisomers*) δ 137.9 (d, <sup>3</sup>J<sub>(C-F)</sub> = 4.9 Hz, 2 × Ar–C<sub>q</sub>), 136.6 (d, <sup>3</sup>J<sub>(C-F)</sub> = 3.3 Hz, 2 × Ar–C<sub>q</sub>), 134.5 (Ar–C<sub>q</sub>), 134.2 (Ar–C<sub>q</sub>), 129.5 (2 × Ar–C), 129.4 (2 × Ar–C), 129.0 (2 × Ar–C), 128.9 (2 × Ar–C), 128.7 (2 × Ar–C), 128.6 (4 × Ar–C), 128.2 (2 × Ar–C), 127.0 (Ar–C), 126.8 (Ar–C), 97.0 (d, <sup>1</sup>J<sub>(C-F)</sub> = 177.8 Hz, CHF), 96.5 (d, <sup>1</sup>J<sub>(C-F)</sub> = 177.0 Hz, CHF), 74.8 (d, <sup>2</sup>J<sub>(C-F)</sub> = 20.8 Hz, COHCHF), 74.3 (d, <sup>2</sup>J<sub>(C-F)</sub> = 23.5 Hz, COHCHF), 37.4 (d, <sup>2</sup>J<sub>(C-F)</sub> = 21.1 Hz, PhCH<sub>2</sub>CHF), 36.1 (d, <sup>2</sup>J<sub>(C-F)</sub> = 21.1 Hz, PhCH<sub>2</sub>CHF); <sup>19</sup>F NMR (470 MHz, CDCl<sub>3</sub>) δ -188.0 – -187.8 (m, 0.3F minor, CHF), -189.7 – -189.5 (m, 1F major, CHF); HRMS (ESI) m/z Calcd for C<sub>15</sub>H<sub>12</sub>ClO [(M-HF)-H]<sup>-</sup> 243.0582; Found: 243.0369.

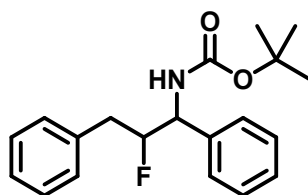

**3aq; tert-butyl (2-fluoro-1,3-diphenylpropyl)carbamate**

Prepared according to general procedure GP to afford **3aq** (dr = 60:40) obtained as a yellow oil (dr = 75:25 128 mg, 65%) after column chromatography ( $R_f$  = 0.2, hexane/EtOAc/Net<sub>3</sub> 9:1:0.1); *Inseparable mixture of diastereoisomers*; IR (film)/cm<sup>-1</sup> 3433, 3031, 2918, 2850, 1704, 1495, 1366, 1166, 876; <sup>1</sup>H NMR (500 MHz, CDCl<sub>3</sub>, *mixture of diastereoisomers*) δ 7.40–7.22 (m overlapping with CDCl<sub>3</sub>, 8H major + 3H minor, Ar–H), 7.14 (d,  $J$  = 7.3 Hz, 2H, 2 × Ar–H), 5.34 (broad s, 1H major + 0.3H minor, 2 × N–H), 5.09–4.59 (m, 2H major + 0.6H minor, 2 × CHFCH<sub>2</sub> overlapping with 2 × CHNH), 3.13–2.94 (m, 0.6H minor, 2 × PhCHHCHF), 2.76–2.67 (m, 2H major, 2 × PhCHHCHF), 1.46 (s, 1.8H minor, 3 × CH<sub>3</sub>), 1.41 (s, 9H major, 3 × CH<sub>3</sub>); <sup>13</sup>C NMR (125 MHz, CDCl<sub>3</sub>, *mixture of diastereoisomers*) δ 155.6 (CO<sub>2</sub>N), 155.1 (CO<sub>2</sub>N), 136.7 (d, <sup>3</sup>J<sub>(C-F)</sub> = 2.4 Hz, 2 × Ar–C<sub>q</sub>), 136.7 (d, <sup>3</sup>J<sub>(C-F)</sub> = 3.6 Hz, 2 × Ar–C<sub>q</sub>), 129.5 (2 × Ar–C), 129.3 (2 × Ar–C), 128.8 (2 × Ar–C), 128.7 (2 × Ar–C), 128.5 (2 × Ar–C), 128.6 (4 × Ar–C), 128.2 (Ar–C), 127.8 (Ar–C), 127.0 (2 × Ar–C), 126.9 (2 × Ar–C), 96.7 (d, <sup>1</sup>J<sub>(C-F)</sub> = 173.2 Hz, CHF), 96.0 (d, <sup>1</sup>J<sub>(C-F)</sub> = 181.5 Hz, CHF), 80.1 (2 × OC(CH<sub>3</sub>)<sub>3</sub>), 57.7 (d, <sup>2</sup>J<sub>(C-F)</sub> = 19.1 Hz, 2 × CNHCHF), 38.9 (d, <sup>2</sup>J<sub>(C-F)</sub> = 22.1 Hz, PhCH<sub>2</sub>CHF), 38.7 (d, <sup>2</sup>J<sub>(C-F)</sub> = 20.5 Hz, PhCH<sub>2</sub>CHF), 29.8 (3 × CH<sub>3</sub>), 28.5 (3 × CH<sub>3</sub>); <sup>19</sup>F NMR (470 MHz, CDCl<sub>3</sub>) δ -192.2 – -192.0 (m, 0.3F minor, CHF), -193.6 – -193.3 (m, 1F major, CHF); HRMS (ESI) m/z Calcd for C<sub>20</sub>H<sub>24</sub>FNNaO<sub>2</sub> [M+Na]<sup>+</sup> 352.1683; Found: 352.1689.

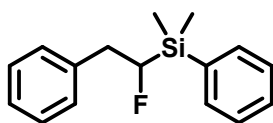

**3ar; (1-fluoro-2-phenylethyl)dimethyl(phenyl)silane**

Prepared according to general procedure GP, with slight modifications. The solution resulting from the microfluidic system was quenched with 150  $\mu\text{L}$  of MeOH, filtered on  $\text{Na}_2\text{SO}_4$  and concentrated under reduced pressure to afford **3ar** as a colorless oil (47 mg, 30%) after column chromatography ( $R_f = 0.1$ , hexane/Et<sub>2</sub>O 9:1); IR (film)/ $\text{cm}^{-1}$  3068, 3028, 2958, 2925, 1953, 1604, 1251, 834; <sup>1</sup>H NMR (500 MHz, CDCl<sub>3</sub>)  $\delta$  7.56 (dd,  $J = 7.5, 1.6$  Hz, 2H, 2  $\times$  Ar-H), 7.42–7.39 (m, 3H, 3  $\times$  Ar-H), 7.28–7.25 (m, 2H, 2  $\times$  Ar-H overlapping with CDCl<sub>3</sub>), 7.21–7.17 (m, 3H, 3  $\times$  Ar-H), 4.85 (ddd,  $^2J_{\text{(H-F)}} = 46.1$  Hz,  $^3J_{\text{(H-H)}} = 10.8, 3.6$  Hz, 1H, CHFCH<sub>2</sub>), 3.03 (ddd,  $^3J_{\text{(H-F)}} = 17.9$  Hz,  $^2J_{\text{(H-H)}} = 15.0$  Hz,  $^3J_{\text{(H-H)}} = 10.8$  Hz, 1H, PhCHHCHF), 2.85 (ddd,  $^3J_{\text{(H-F)}} = 41.8$  Hz,  $^2J_{\text{(H-H)}} = 15.0$  Hz,  $^3J_{\text{(H-H)}} = 3.6$  Hz, 1H, PhCHHCHF), 0.38 (s, 3H, SiCH<sub>3</sub>), 0.36 (s, 3H, SiCH<sub>3</sub>); <sup>13</sup>C NMR (125 MHz, CDCl<sub>3</sub>)  $\delta$  139.2 (d,  $^3J_{\text{(C-F)}} = 3.8$  Hz, Ar-C<sub>q</sub>), 135.5 (d,  $^3J_{\text{(C-F)}} = 3.0$  Hz, Ar-C<sub>q</sub>), 134.3 (2  $\times$  Ar-C), 129.8 (Ar-C), 129.1 (2  $\times$  Ar-C), 128.5 (2  $\times$  Ar-C), 128.1 (2  $\times$  Ar-C), 126.5 (Ar-C), 92.7 (d,  $^1J_{\text{(C-F)}} = 167.2$  Hz, CHF), 38.4 (d,  $^2J_{\text{(C-F)}} = 19.7$  Hz, PhCH<sub>2</sub>CHF), -5.3 (CH<sub>3</sub>), -5.5 (CH<sub>3</sub>); <sup>19</sup>F NMR (470 MHz, CDCl<sub>3</sub>)  $\delta$  -186.7 (ddd,  $^2J_{\text{(H-F)}} = 46.1$  Hz,  $^3J_{\text{(H-F)}} = 41.8, 17.9$  Hz, 1F, CHF); The product **3ar** decomposed during high-resolution mass (HRMS) analysis.

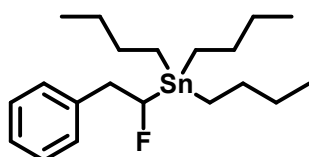

**3as; tributyl(1-fluoro-2-phenylethyl)stannane**

Prepared according to general procedure GP to afford **3as** as a colorless oil (156 mg, 63%) after column chromatography ( $R_f = 0.3$ , hexane); IR (film)/ $\text{cm}^{-1}$  3584, 3064, 2956, 2924, 2852, 1495, 1455, 1075, 960; <sup>1</sup>H NMR (500 MHz, CDCl<sub>3</sub>)  $\delta$  7.31–7.28 (m, 2H, 2  $\times$  Ar-H), 7.24–7.21 (m, 3H, 3  $\times$  Ar-H), 4.91 (ddd,  $^2J_{\text{(H-F)}} = 46.1$  Hz,  $^3J_{\text{(H-H)}} = 8.9, 5.8$  Hz, 1H, CHFCH<sub>2</sub>), 3.36–3.27 (m, 1H, PhCHHCHF), 3.13 (ddd,  $^3J_{\text{(H-F)}} = 32.8$  Hz,  $^2J_{\text{(H-H)}} = 14.3$  Hz,  $^3J_{\text{(H-H)}} = 5.8$  Hz, 1H, PhCHHCHF), 1.48–1.41 (m, 6H, 3  $\times$  CH<sub>2</sub>), 1.32–1.24 (m, 6H, 3  $\times$  CH<sub>2</sub>), 0.90–0.83 (m, 15H, 3  $\times$  CH<sub>3</sub> overlapping with 3  $\times$  CH<sub>2</sub>); <sup>13</sup>C NMR (125 MHz, CDCl<sub>3</sub>)  $\delta$  139.3 (d,  $^3J_{\text{(C-F)}} = 6.7$  Hz, Ar-C<sub>q</sub>), 129.2 (2  $\times$  Ar-C), 128.6 (2  $\times$  Ar-C), 126.6 (Ar-C), 95.7 (d,  $^1J_{\text{(C-F)}} = 189.4$  Hz, CHF), 42.4 (d,  $^2J_{\text{(C-F)}} = 18.5$  Hz, PhCH<sub>2</sub>CHF), 29.1 (3  $\times$  CH<sub>2</sub>), 27.5 (3  $\times$  CH<sub>2</sub>), 29.1 (3  $\times$  CH<sub>2</sub>), 13.8 (3  $\times$  CH<sub>3</sub>), 9.1 (d,  $^3J_{\text{(C-F)}} = 3.1$  Hz, 3  $\times$  CH<sub>2</sub>); <sup>19</sup>F NMR (470 MHz, CDCl<sub>3</sub>)  $\delta$  -208.9 (ddd,  $^2J_{\text{(H-F)}} = 46.1$  Hz,  $^3J_{\text{(H-F)}} = 32.8, 21.6$  Hz, 1F, CHF); HRMS (ESI)  $m/z$  Calcd for C<sub>20</sub>H<sub>34</sub>FSn [M-H]<sup>-</sup> 413.1672; Found: 413.1667.

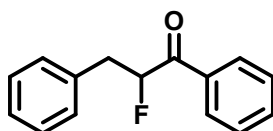

**3at; 2-fluoro-1,3-diphenylpropan-1-one**

Prepared according to general procedure GP to afford **3at** as a white solid (97 mg, 71%) after column chromatography ( $R_f = 0.4$ , hexane/Et<sub>2</sub>O 9:1); <sup>1</sup>H NMR (500 MHz, CDCl<sub>3</sub>)  $\delta$  7.95–7.93 (m, 2H, 2  $\times$  Ar-H), 7.62–7.59 (m, 1H, Ar-H), 7.50–7.46 (m, 2H, 2  $\times$  Ar-H), 7.34–7.25 (m, 5H, 5  $\times$  Ar-H), 5.74 (ddd,  $^2J_{\text{(H-F)}} = 49.0$  Hz,  $^3J_{\text{(H-H)}} = 8.3, 4.0$  Hz, 1H, CHFCH<sub>2</sub>), 3.38–3.20 (m, 2H, 2  $\times$  PhCHHCHF); in according to spectral data reported in the literature.<sup>9</sup>

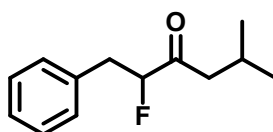

**3au; 2-fluoro-5-methyl-1-phenylhexan-3-one**

Prepared according to general procedure GP to afford **3au** as a white waxy solid (61 mg, 49%) after column chromatography ( $R_f = 0.3$ , hexane/EtOAc 8:2); IR (film)/ $\text{cm}^{-1}$  3032, 2958, 2929, 2872, 1722, 1497, 1455, 1368,

1047;  $^1\text{H}$  NMR (500 MHz,  $\text{CDCl}_3$ )  $\delta$  7.31 (t,  $J = 7.2$  Hz, 2H,  $2 \times \text{Ar-H}$ ), 7.27–7.26 (m, 1H, Ar-H overlapping with  $\text{CDCl}_3$ ), 7.23 (d,  $J = 7.2$  Hz, 2H,  $2 \times \text{Ar-H}$ ), 4.91 (ddd,  $^2J_{(\text{H-F})} = 49.8$  Hz,  $^3J_{(\text{H-H})} = 7.7$ , 3.7 Hz, 1H,  $\text{CHFCH}_2$ ), 3.18 (ddd,  $^3J_{(\text{H-F})} = 29.3$  Hz,  $^2J_{(\text{H-H})} = 14.8$  Hz,  $^3J_{(\text{H-H})} = 3.7$  Hz, 1H,  $\text{PhCHHCHF}$ ), 3.03 (ddd,  $^3J_{(\text{H-F})} = 25.9$  Hz,  $^2J_{(\text{H-H})} = 14.8$  Hz,  $^3J_{(\text{H-H})} = 7.7$  Hz, 1H,  $\text{PhCHHCHF}$ ), 2.46 (ddd,  $^2J_{(\text{H-H})} = 17.5$  Hz,  $^4J_{(\text{H-F})} = 6.5$  Hz,  $^3J_{(\text{H-H})} = 3.7$  Hz, 1H,  $\text{CHHCO}$ ), 2.24 (ddd,  $^2J_{(\text{H-H})} = 17.5$  Hz,  $^4J_{(\text{H-F})} = 7.0$  Hz,  $^3J_{(\text{H-H})} = 2.9$  Hz, 1H,  $\text{CHHCO}$ ), 2.16–2.08 (m, 1H,  $\text{CH}_2\text{CH}(\text{CH}_3)_2$ ), 0.90 (d,  $^3J = 6.7$  Hz, 3H,  $\text{CH}_3$ ), 0.85 (d,  $^3J = 6.6$  Hz, 3H,  $\text{CH}_3$ );  $^{13}\text{C}$  NMR (125 MHz,  $\text{CDCl}_3$ )  $\delta$  209.5 (d,  $^2J_{(\text{C-F})} = 24.4$  Hz, CO), 135.6 (Ar- $\text{C}_q$ ), 129.7 ( $2 \times \text{Ar-C}$ ), 128.7 ( $2 \times \text{Ar-C}$ ), 127.2 (Ar-C), 96.1 (d,  $^1J_{(\text{C-F})} = 187.6$  Hz, CHF), 47.5 (s,  $\text{CH}_2\text{CO}$ ), 38.3 (d,  $^2J_{(\text{C-F})} = 20.5$  Hz,  $\text{PhCH}_2\text{CHF}$ ), 23.5 (d,  $^4J_{(\text{C-F})} = 1.9$  Hz,  $\text{CH}_2\text{CH}(\text{CH}_3)_2$ ), 22.7 ( $\text{CH}_3$ ), 22.6 ( $\text{CH}_3$ );  $^{19}\text{F}$  NMR (470 MHz,  $\text{CDCl}_3$ )  $\delta$  -190.3 – -190.1 (m, 1F, CHF); HRMS (ESI)  $m/z$  Calcd for  $\text{C}_{13}\text{H}_{17}\text{FNaO}$  [ $\text{M}+\text{Na}$ ] $^+$  231.1156; Found: 231.1161.

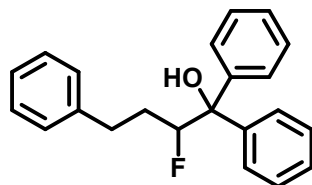

**3ba; 2-fluoro-1,1,4-triphenylbutan-1-ol**

Prepared according to general procedure GP to afford **3ba** as a white waxy solid (182 mg, 95%) after column chromatography ( $R_f = 0.3$ , hexane/ $\text{Et}_2\text{O}$  9:1); IR (film)/ $\text{cm}^{-1}$  3400, 2917, 1599, 1493, 1447, 1168, 976, 748;  $^1\text{H}$  NMR (500 MHz,  $\text{CDCl}_3$ )  $\delta$  7.50 (d,  $J = 8.1$  Hz, 2H,  $2 \times \text{Ar-H}$ ), 7.32 (t,  $J = 8.0$  Hz, 4H,  $4 \times \text{Ar-H}$ ), 7.28–7.23 (m, 5H,  $5 \times \text{Ar-H}$ , overlapping with  $\text{CDCl}_3$ ), 7.22–7.17 (m, 2H,  $2 \times \text{Ar-H}$ ), 7.10 (d,  $J = 7.2$  Hz, 2H,  $2 \times \text{Ar-H}$ ), 5.36 (ddd,  $^2J_{(\text{H-F})} = 47.2$  Hz,  $^3J_{(\text{H-H})} = 10.1$ , 2.0 Hz, 1H,  $\text{CHFCH}_2$ ), 2.88–2.82 (m, 1H,  $\text{PhCHHCH}_2$ ), 2.65–2.59 (m, 2H,  $\text{PhCHHCH}_2$  overlapping with O-H), 2.17–2.05 (m, 1H,  $\text{CHHCHF}$ ), 1.73–1.57 (m, 1H,  $\text{CHHCHF}$ );  $^{13}\text{C}$  NMR (125 MHz,  $\text{CDCl}_3$ )  $\delta$  144.8 (Ar- $\text{C}_q$ ), 143.1 (d,  $^3J_{(\text{C-F})} = 4.2$  Hz, Ar- $\text{C}_q$ ), 141.3 (Ar- $\text{C}_q$ ), 128.6 ( $2 \times \text{Ar-C}$ ), 128.5 ( $4 \times \text{Ar-C}$ ), 128.4 ( $2 \times \text{Ar-C}$ ), 127.5 (Ar-C), 127.4 (Ar-C), 126.9 (d,  $^4J_{(\text{C-F})} = 1.7$  Hz,  $2 \times \text{Ar-C}$ ), 126.1 (Ar-C), 126.0 ( $2 \times \text{Ar-C}$ ), 95.3 (d,  $^1J_{(\text{C-F})} = 178.6$  Hz, CHF), 79.2 (d,  $^2J_{(\text{C-F})} = 20.7$  Hz,  $\text{C}_q\text{OHCHF}$ ), 31.8 (d,  $^3J_{(\text{C-F})} = 3.5$  Hz,  $\text{PhCH}_2\text{CH}_2$ ), 30.6 (d,  $^2J_{(\text{C-F})} = 21.3$  Hz,  $\text{CH}_2\text{CH}_2\text{CHF}$ );  $^{19}\text{F}$  NMR (470 MHz,  $\text{CDCl}_3$ )  $\delta$  -190.3 (ddd,  $^2J_{(\text{H-F})} = 47.4$  Hz,  $^3J_{(\text{H-F})} = 40.1$ , 13.4 Hz, 1F, CHF); HRMS (ESI)  $m/z$  Calcd for  $\text{C}_{22}\text{H}_{21}\text{FNaO}$  [ $\text{M-H}$ ] 343.1469; Found: 343.1449.

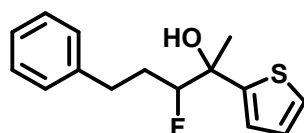

**3bm; 3-fluoro-5-phenyl-2-(thiophen-2-yl)pentan-2-ol**

Prepared according to general procedure GP to afford **3bm** (dr = 60:40) obtained as a waxy solid (dr = 70:30, 123 mg, 78%) after column chromatography ( $R_f = 0.3$ , hexane/ $\text{Et}_2\text{O}$  85:15); *Inseparable mixture of diastereoisomers*; IR (film)/ $\text{cm}^{-1}$  3435, 3027, 2918, 2849, 1496, 1455, 1237, 698;  $^1\text{H}$  NMR (500 MHz,  $\text{CDCl}_3$ , *mixture of diastereoisomers*)  $\delta$  7.37–7.12 (m overlapping with  $\text{CDCl}_3$ , 6H *major* + 2.4H *minor*, Ar-H), 6.98–6.88 (m, 2H *major* + 0.8H *minor*, Ar-H), 4.61–4.43 (m, 1H *major* + 0.4H *minor*,  $\text{CHFCH}_2$ ), 2.89–2.81 (m, 1H *major* + 0.4H *minor*,  $\text{PhCHHCH}_2$ ), 2.66–2.58 (m, 1H *major* + 0.4H *minor*,  $\text{PhCHHCH}_2$ ), 2.54 (d,  $^4J_{(\text{H-F})} = 1.9$  Hz, 1H *major*, O-H), 2.36 (d,  $^4J_{(\text{H-F})} = 1.2$  Hz, 0.4H *minor*, O-H), 2.01–1.97 (m, 1H *major* + 0.4H *minor*), 1.67 (d,  $^4J_{(\text{H-F})} = 2.0$  Hz, 1.2H *minor*,  $\text{CH}_3$ ), 1.66 (d,  $^4J_{(\text{H-F})} = 1.4$  Hz, 3H *major*,  $\text{CH}_3$ );  $^{13}\text{C}$  NMR (125 MHz,  $\text{CDCl}_3$ , *mixture of diastereoisomers*)  $\delta$  148.0 (d,  $^3J_{(\text{C-F})} = 3.8$  Hz, Ar- $\text{C}_q$ ), 147.9 (d,  $^3J_{(\text{C-F})} = 2.9$  Hz, Ar- $\text{C}_q$ ), 141.3 (Ar- $\text{C}_q$ ), 141.2 (Ar- $\text{C}_q$ ), 128.6 ( $8 \times \text{Ar-C}$ ), 127.1 (Ar-C), 127.0 (Ar-C), 126.2 (Ar-C), 126.1 (Ar-C), 125.2 (Ar-C), 124.7 (Ar-C), 124.2 (d,  $^4J_{(\text{C-F})} = 1.2$  Hz, Ar-C), 123.5 (d,  $^4J_{(\text{C-F})} = 0.7$  Hz, Ar-C), 98.4 (d,  $^1J_{(\text{C-F})} = 178.5$  Hz, CHF), 98.1 (d,  $^1J_{(\text{C-F})} = 179.2$  Hz, CHF), 75.2 (d,  $^2J_{(\text{C-F})} = 21.4$  Hz,  $\text{C}_q\text{OHCHF}$ ), 75.1 (d,  $^2J_{(\text{C-F})} = 21.8$  Hz,  $\text{C}_q\text{OHCHF}$ ), 31.9 (d,  $^3J_{(\text{C-F})} = 2.8$  Hz,  $\text{PhCH}_2\text{CH}_2$ ), 31.8 (d,  $^3J_{(\text{C-F})} = 3.2$  Hz,  $\text{PhCH}_2\text{CH}_2$ ), 31.9 (d,  $^2J_{(\text{C-F})} = 21.1$  Hz,  $\text{CH}_2\text{CH}_2\text{CHF}$ ), 31.1 (d,  $^2J_{(\text{C-F})} = 21.3$  Hz,  $\text{CH}_2\text{CH}_2\text{CHF}$ ), 27.3 (d,  $^3J_{(\text{C-F})} = 3.6$  Hz,  $\text{CH}_3$ ), 24.9 (d,  $^3J_{(\text{C-F})} = 3.0$  Hz,  $\text{CH}_3$ );  $^{19}\text{F}$  NMR (470 MHz,

CDCl<sub>3</sub>)  $\delta$  -190.0 (ddd,  $^2J_{(H-F)} = 48.5$  Hz,  $^3J_{(H-F)} = 39.0$ , 16.0 Hz, 1F *major*, CHF), -191.0 (ddd,  $^2J_{(H-F)} = 47.9$  Hz,  $^3J_{(H-F)} = 40.9$ , 13.8 Hz, 0.4F *minor*, CHF); HRMS (ESI) *m/z* Calcd for C<sub>15</sub>H<sub>16</sub>FOS [M-H]<sup>-</sup> 263.0911; Found: 263.0917; Calcd for C<sub>15</sub>H<sub>15</sub>OS [(M-HF)-H]<sup>-</sup> 243.0849; Found: 243.0842 .

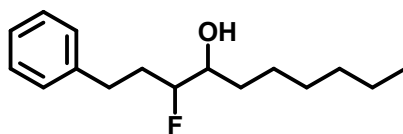

**3bn; 3-fluoro-1-phenyldecan-4-ol**

Prepared according to general procedure GP to afford **3bn** as a white waxy solid (dr = 60:40, 75 mg, 50%) after column chromatography (*R<sub>f</sub>* = 0.5, hexane/EtOAc 9:1); *Inseparable mixture of diastereoisomers*; IR (film)/cm<sup>-1</sup> 3400, 3028, 2925, 2856, 1496, 1455, 1029, 699; <sup>1</sup>H NMR (500 MHz, CDCl<sub>3</sub>, *mixture of diastereoisomers*)  $\delta$  7.30 (t, *J* = 7.4 Hz, 2H *major* + 1.2H *minor*, Ar-H), 7.22–7.19 (m, 3H *major* + 1.8H *minor*, Ar-H), 4.39 (dddd,  $^2J_{(H-F)} = 48.0$  Hz,  $^3J_{(H-H)} = 10.1$ , 3.8, 2.6 Hz, 1H *major*, CH<sub>2</sub>CHFCHOH, overlapping with *minor*'s CH<sub>2</sub>CHFCHOH), 4.33 (dddd,  $^2J_{(H-F)} = 48.6$  Hz,  $^3J_{(H-H)} = 9.3$ , 4.6, 3.4 Hz, 0.6H *minor*, CH<sub>2</sub>CHFCHOH, overlapping with *major*'s CH<sub>2</sub>CHFCHOH), 3.77–3.73 (m, 1H *major*, CHOH), 3.60–3.56 (m, 0.6H *minor*, CHOH), 2.93–2.82 (m, 1H *major* + 0.6H *minor*, PhCHHCH<sub>2</sub>), 2.75–2.66 (m, 1H *major* + 0.6H *minor*, PhCHHCH<sub>2</sub>), 2.11–2.02 (m, 1H *major* + 0.6H *minor*, CH<sub>2</sub>CHHCHF), 1.92–1.79 (m, 1H *major* + 0.6H *minor*, CH<sub>2</sub>CHHCHF), 1.72 (broad s, 1H *major*, O-H), 1.56 (broad s, 0.6H *minor*, O-H), 1.48–1.26 (m, 10H *major* + 6H *minor*, CH<sub>2</sub>), 0.88 (t, *J* = 6.9 Hz, 3H *major* + 1.8H *minor*, CH<sub>3</sub>); <sup>13</sup>C NMR (125 MHz, CDCl<sub>3</sub>, *mixture of diastereoisomers*)  $\delta$  141.5 (Ar-C<sub>q</sub>), 141.4 (Ar-C<sub>q</sub>), 128.6 (8 × Ar-C), 126.2 (2 × Ar-C), 95.8 (d,  $^1J_{(C-F)} = 170.2$  Hz, CHF), 95.7 (d,  $^1J_{(C-F)} = 170.1$  Hz, CHF), 73.2 (d,  $^2J_{(C-F)} = 19.5$  Hz, COHCHF), 73.1 (d,  $^2J_{(C-F)} = 21.6$  Hz, COHCHF), 33.1 (d,  $^2J_{(C-F)} = 21.2$  Hz, CH<sub>2</sub>CH<sub>2</sub>CHF), 33.0 (d,  $^3J_{(C-F)} = 9.5$  Hz, CH<sub>2</sub>CHOH), 31.9 (d  $^3J_{(C-F)} = 6.3$  Hz, CH<sub>2</sub>CHOH, overlapping with CH<sub>2</sub>), 31.5 (d,  $^3J_{(C-F)} = 3.4$  Hz, PhCH<sub>2</sub>CH<sub>2</sub>), 31.4 (d,  $^3J_{(C-F)} = 4.4$  Hz, PhCH<sub>2</sub>CH<sub>2</sub>), 31.3 (d,  $^2J_{(C-F)} = 21.1$  Hz, CH<sub>2</sub>CH<sub>2</sub>CHF), 29.9 (CH<sub>2</sub>), 29.4 (2 × CH<sub>2</sub>), 25.8 (CH<sub>2</sub>), 25.5 (CH<sub>2</sub>), 22.7 (2 × CH<sub>2</sub>), 14.2 (2 × CH<sub>3</sub>); <sup>19</sup>F NMR (470 MHz, CDCl<sub>3</sub>)  $\delta$  -192.1 (ddt,  $^2J_{(H-F)} = 48.0$  Hz,  $^3J_{(H-F)} = 39.3$ , 14.8 Hz, 1F *major*, CHF), -196.7 – -196.5 (m, 0.6F *minor*, CHF); HRMS (ESI) *m/z* Calcd for C<sub>16</sub>H<sub>24</sub>FO [M-H]<sup>-</sup> 251.1817; Found: 251.1815.

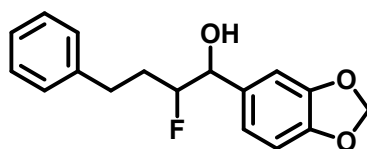

**3bo; 1-(benzo[d][1,3]dioxol-5-yl)-2-fluoro-4-phenylbutan-1-ol**

Prepared according to general procedure GP to afford **3bo** as a white waxy solid (dr = 50:50, 103 mg, 60%) after column chromatography (*R<sub>f</sub>* = 0.2, hexane/Et<sub>2</sub>O 8:2); *Inseparable mixture of diastereoisomers*; IR (film)/cm<sup>-1</sup> 3408, 3027, 2917, 1504, 1488, 1247, 1038, 930; <sup>1</sup>H NMR (500 MHz, CDCl<sub>3</sub>, *mixture of diastereoisomers*)  $\delta$  7.28–7.24 (m, 4H, 4 × Ar-H), 7.19–7.10 (m, 6H, 6 × Ar-H), 6.88–6.82 (m, 2H, 2 × Ar-H), 6.78–6.77 (m, 4H, 4 × Ar-H), 5.96 (s, 2H, CH<sub>2</sub>O<sub>2</sub>), 5.95 (s, 2H, CH<sub>2</sub>O<sub>2</sub>), 4.79–4.43 (m, 4H, 2 × CH<sub>2</sub>CHFCHOH overlapping with 2 × CHFCHOH), 2.87–2.80 (m, 2H, 2 × PhCHHCH<sub>2</sub>), 2.66–2.59 (m, 2H, 2 × PhCHHCH<sub>2</sub>), 2.54 (t, *J* = 2.7 Hz, 1H, O-H), 2.17 (d,  $^4J_{(H-F)} = 3.6$  Hz, 1H, O-H), 2.04–1.60 (m, 4H, 4 × CH<sub>2</sub>CHHCHF); <sup>13</sup>C NMR (125 MHz, CDCl<sub>3</sub>, *mixture of diastereoisomers*)  $\delta$  148.1 (Ar-C<sub>q</sub>), 148.0 (Ar-C<sub>q</sub>), 147.9 (Ar-C<sub>q</sub>), 147.5 (Ar-C<sub>q</sub>), 133.2 (d,  $^3J_{(C-F)} = 4.9$  Hz, Ar-C<sub>q</sub>), 132.9 (d,  $^3J_{(C-F)} = 6.5$  Hz, Ar-C<sub>q</sub>), 128.6 (3 × Ar-C), 128.5 (Ar-C), 126.2 (2 × Ar-C), 120.9 (Ar-C), 120.3 (Ar-C), 119.5 (Ar-C), 108.5 (Ar-C), 108.3 (Ar-C), 108.2 (Ar-C), 107.5 (Ar-C), 107.3 (2 × Ar-C), 106.5 (Ar-C), 101.3 (2 × CH<sub>2</sub>O<sub>2</sub>) 96.6 (d,  $^1J_{(C-F)} = 174.1$  Hz, CHF), 95.6 (d,  $^1J_{(C-F)} = 174.3$  Hz, CHF), 76.4 (d,  $^2J_{(C-F)} = 20.9$  Hz, COHCHF), 75.2 (d,  $^2J_{(C-F)} = 22.6$  Hz, COHCHF), 32.9 (d,  $^2J_{(C-F)} = 20.6$  Hz, CH<sub>2</sub>CH<sub>2</sub>CHF), 31.5 (d,  $^3J_{(C-F)} = 9.5$  Hz, PhCH<sub>2</sub>CH<sub>2</sub>), 31.4 (d  $^2J_{(C-F)} = 20.4$  Hz, CH<sub>2</sub>CH<sub>2</sub>CHF), 31.3 (d,  $^3J_{(C-F)} = 3.7$  Hz, PhCH<sub>2</sub>CH<sub>2</sub>), 31.4 (d,  $^3J_{(C-F)} = 4.4$  Hz, PhCH<sub>2</sub>CH<sub>2</sub>), 31.3 (d,  $^2J_{(C-F)} = 21.1$  Hz, CH<sub>2</sub>CH<sub>2</sub>CHF), 29.9 (CH<sub>2</sub>), 29.4 (2 × CH<sub>2</sub>), 25.8 (CH<sub>2</sub>), 25.5 (CH<sub>2</sub>),

22.7 (2 × CH<sub>2</sub>), 14.2 (2 × CH<sub>3</sub>); <sup>19</sup>F NMR (470 MHz, CDCl<sub>3</sub>) δ -191.2 (ddt, <sup>2</sup>J<sub>(H-F)</sub> = 47.9 Hz, <sup>3</sup>J<sub>(H-F)</sub> = 37.8, 14.4 Hz, 1F, CHF), -190.0 – -189.8 (m, 1F, CHF); HRMS (ESI) m/z Calcd for C<sub>17</sub>H<sub>17</sub>FNao<sub>3</sub> [M+Na]<sup>+</sup> 311.1054; Found: 311.1057.

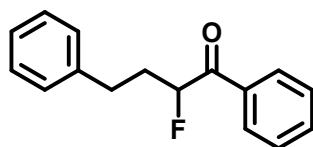

**3bt; 2-fluoro-1,4-diphenylbutan-1-one**

Prepared according to general procedure GP to afford **3bt** as a white waxy solid (87 mg, 60%) after column chromatography (*R<sub>f</sub>* = 0.4, hexane/Et<sub>2</sub>O 98:2); IR (film)/cm<sup>-1</sup> 3029, 2959, 2930, 2863, 1640, 1580, 1496, 1449, 1249; <sup>1</sup>H NMR (500 MHz, CDCl<sub>3</sub>) δ 7.87 (d, *J* = 7.6 Hz, 2H, 2 × Ar-H), 7.60–7.57 (m, 1H, Ar-H), 7.45 (t, *J* = 7.8 Hz, 2H, 2 × Ar-H), 7.32 (t, *J* = 7.5 Hz, 2H, 2 × Ar-H), 7.25–7.22 (m, 3H, 3 × Ar-H), 5.61–5.49 (m, 1H, CHF), 2.94–2.82 (m, 2H, PhCH<sub>2</sub>CH<sub>2</sub>), 2.32–2.22 (m, 2H, CH<sub>2</sub>CHF); <sup>13</sup>C NMR (125 MHz, CDCl<sub>3</sub>) δ 196.7 (d, <sup>2</sup>J<sub>(C-F)</sub> = 19.2 Hz, CO), 140.4 (Ar-C<sub>q</sub>), 133.9 (Ar-C), 129.0 (d, <sup>3</sup>J<sub>(C-F)</sub> = 3.6 Hz, Ar-C<sub>q</sub>), 128.9 (2 × Ar-C), 128.8 (6 × Ar-C), 126.5 (Ar-C), 92.7 (d, <sup>1</sup>J<sub>(C-F)</sub> = 183.4 Hz, CHF), 34.5 (d, <sup>2</sup>J<sub>(C-F)</sub> = 21.4 Hz, CH<sub>2</sub>CH<sub>2</sub>CHF), 31.0 (d, <sup>3</sup>J<sub>(C-F)</sub> = 3.2 Hz, PhCH<sub>2</sub>CH<sub>2</sub>); <sup>19</sup>F NMR (470 MHz, CDCl<sub>3</sub>) δ -191.5 – -191.3 (m, 1F, CHF); HRMS (ESI) m/z Calcd for C<sub>16</sub>H<sub>15</sub>FNao [M+Na]<sup>+</sup> 265.0999; Found: 265.0995.

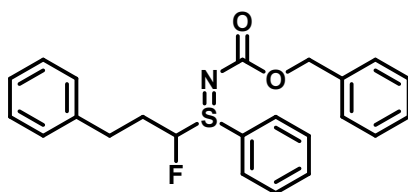

**3bv-A; benzyl (1-fluoro-3-phenylpropyl)(phenyl)-I<sup>4</sup>-sulfanylidene carbamate**

Prepared according to general procedure GP to afford **3bv-A** as yellow oil (35 mg, 30%) after column chromatography (*R<sub>f</sub>* = 0.3, hexane/Et<sub>2</sub>O 6:4); IR (film)/cm<sup>-1</sup> 3063, 3030, 2918, 2850, 1738, 1644, 1454, 1254; <sup>1</sup>H NMR (500 MHz, CDCl<sub>3</sub>) δ 7.81 (d, *J* = 8.0 Hz, 2H, 2 × Ar-H), 7.63–7.60 (m, 1H, Ar-H), 7.55 (t, *J* = 7.5 Hz, 2H, 2 × Ar-H), 7.38 (d, *J* = 7.1 Hz, 2H, 2 × Ar-H), 7.33–7.27 (m, 5H, 5 × Ar-H), 7.22 (t, *J* = 7.5 Hz, 1H, Ar-H), 7.15 (d, *J* = 7.1 Hz, 2H, 2 × Ar-H), 5.28 (ddd, <sup>2</sup>J<sub>(H-F)</sub> = 49.2 Hz, <sup>3</sup>J<sub>(H-H)</sub> = 8.7, 2.7 Hz, 1H, SCHFCH<sub>2</sub>), 5.14 (d, <sup>2</sup>J<sub>(H-H)</sub> = 12.4 Hz, 1H, PhCHHO), 5.11 (d, <sup>2</sup>J<sub>(H-H)</sub> = 12.4 Hz, 1H, PhCHHO), 2.98–2.92 (m, 1H, PhCHHCH<sub>2</sub>), 2.82–2.78 (m, 1H, PhCHHCH<sub>2</sub>), 2.56–2.30 (m, 2H, 2 × CHHCHF); <sup>13</sup>C NMR (125 MHz, CDCl<sub>3</sub>) δ 164.9 (d, <sup>4</sup>J<sub>(C-F)</sub> = 1.7 Hz, CO<sub>2</sub>N), 139.2 (2 × Ar-C<sub>q</sub>), 137.3 (Ar-C<sub>q</sub>), 133.5 (Ar-C), 129.9 (2 × Ar-C), 128.8 (2 × Ar-C), 128.6 (2 × Ar-C), 128.4 (2 × Ar-C), 128.3 (2 × Ar-C), 128.0 (2 × Ar-C), 127.9 (Ar-C), 126.7 (Ar-C), 105.3 (d, <sup>1</sup>J<sub>(C-F)</sub> = 226.2 Hz, SCHF), 68.1 (OCH<sub>2</sub>Ph), 32.3 (d, <sup>2</sup>J<sub>(C-F)</sub> = 18.7 Hz, CH<sub>2</sub>CH<sub>2</sub>CHF), 30.5 (d, <sup>3</sup>J<sub>(C-F)</sub> = 2.5 Hz, PhCH<sub>2</sub>CH<sub>2</sub>); <sup>19</sup>F NMR (470 MHz, CDCl<sub>3</sub>) δ -177.0 – -176.8 (m, 1F, CHF); HRMS (ESI) m/z Calcd for C<sub>23</sub>H<sub>22</sub>FNao<sub>2</sub>S [M+Na]<sup>+</sup> 418.1247; Found: 418.1262.

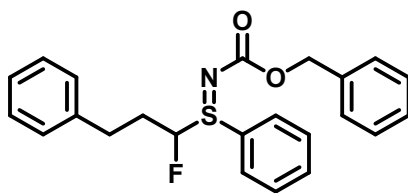

**3bv-B; benzyl (1-fluoro-3-phenylpropyl)(phenyl)-I<sup>4</sup>-sulfanylidene carbamate**

Prepared according to general procedure GP to afford **3bv-B** as a yellow oil (35 mg, 30%) after column chromatography (*R<sub>f</sub>* = 0.2, hexane/Et<sub>2</sub>O 6:4); IR (film)/cm<sup>-1</sup> 3063, 2921, 2851, 1634, 1446, 1376, 1244, 1086; <sup>1</sup>H

NMR (500 MHz, CDCl<sub>3</sub>)  $\delta$  7.74 (d,  $J$  = 8.0 Hz, 2H, 2  $\times$  Ar-H), 7.61–7.58 (m, 1 H, Ar-H), 7.54 (t,  $J$  = 7.5 Hz, 2H, 2  $\times$  Ar-H), 7.40 (d,  $J$  = 7.2 Hz, 2H, 2  $\times$  Ar-H), 7.34–7.26 (m, 5H, 5  $\times$  Ar-H overlapping with CDCl<sub>3</sub>), 7.21 (t,  $J$  = 7.2 Hz, 1H, Ar-H), 7.10 (d,  $J$  = 7.2 Hz, 2H, 2  $\times$  Ar-H), 5.38 (ddd,  $^2J_{(H-F)}$  = 46.8 Hz,  $^3J_{(H-H)}$  = 9.6, 3.0 Hz, 1H, SCHFCH<sub>2</sub>), 5.16 (d,  $^2J_{(H-H)}$  = 12.5 Hz, 1H, PhCHHO), 5.13 (d,  $^2J_{(H-H)}$  = 12.5 Hz, 1H, PhCHHO), 2.86–2.81 (m, 1H, PhCHHCH<sub>2</sub>), 2.77–2.71 (m, 1H, PhCHHCH<sub>2</sub>), 2.39–2.25 (m, 1H, CHHCHF), 1.99–1.89 (m, 1H, CHHCHF); <sup>13</sup>C NMR (125 MHz, CDCl<sub>3</sub>)  $\delta$  165.1 (CO<sub>2</sub>N), 139.1 (2  $\times$  Ar-C<sub>q</sub>), 137.4 (Ar-C<sub>q</sub>), 133.0 (Ar-C), 129.9 (2  $\times$  Ar-C), 128.9 (2  $\times$  Ar-C), 128.6 (2  $\times$  Ar-C), 128.4 (4  $\times$  Ar-C), 128.0 (2  $\times$  Ar-C), 127.9 (Ar-C), 126.8 (Ar-C), 105.2 (d,  $^1J_{(C-F)}$  = 230.6 Hz, SCHF), 68.2 (OCH<sub>2</sub>Ph), 30.6 (d,  $^3J_{(C-F)}$  = 3.0 Hz, PhCH<sub>2</sub>CH<sub>2</sub>), 30.5 (d,  $^2J_{(C-F)}$  = 19.2 Hz, CH<sub>2</sub>CH<sub>2</sub>CHF); <sup>19</sup>F NMR (470 MHz, CDCl<sub>3</sub>)  $\delta$  -179.0 – -178.8 (m, 1F, CHF); HRMS (ESI)  $m/z$  Calcd for C<sub>23</sub>H<sub>22</sub>FN<sub>2</sub>O<sub>2</sub>S [M+Na]<sup>+</sup> 418.1247; Found: 418.1249.

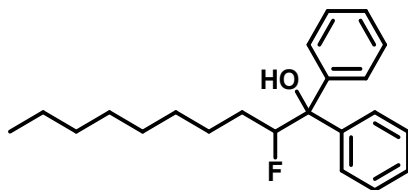

**3ca; 2-fluoro-1,1-diphenyldecan-1-ol**

Prepared according to general procedure GP to afford **3ca** as a white waxy solid (191 mg, 97%) after column chromatography ( $R_f$  = 0.6, hexane/Et<sub>2</sub>O 9:1); IR (film)/cm<sup>-1</sup> 3559, 3010, 2919, 2851, 1660, 1493, 1448, 1171; <sup>1</sup>H NMR (500 MHz, CDCl<sub>3</sub>)  $\delta$  7.54 (d,  $J$  = 8.3 Hz, 2H, 2  $\times$  Ar-H), 7.39–7.28 (m, 6H, 6  $\times$  Ar-H), 7.24–7.20 (m, 2H, 2  $\times$  Ar-H), 5.36 (ddd,  $^2J_{(H-F)}$  = 47.0 Hz,  $^3J_{(H-H)}$  = 10.0, 1.7 Hz, 1H, CHFCH<sub>2</sub>), 2.60 (d,  $^4J_{(H-F)}$  = 2.1, 1H, O-H), 1.82–1.78 (m, 1H, CHHCHF), 1.52–1.46 (m, 1H, CHHCH<sub>2</sub>CHF), 1.37–1.21 (m, 12H, 5  $\times$  CH<sub>2</sub> overlapping with CHHCHF and CHHCH<sub>2</sub>CHF), 0.86 (t,  $J$  = 7.0 Hz, 3H, CH<sub>3</sub>); <sup>13</sup>C NMR (125 MHz, CDCl<sub>3</sub>)  $\delta$  144.8 (Ar-C<sub>q</sub>), 143.1 (d,  $^3J_{(C-F)}$  = 4.1 Hz, Ar-C<sub>q</sub>), 128.2 (4  $\times$  Ar-C), 127.2 (Ar-C), 127.1 (Ar-C), 126.7 (d,  $^4J_{(C-F)}$  = 1.6 Hz, 2  $\times$  Ar-C), 125.8 (2  $\times$  Ar-C), 96.3 (d,  $^1J_{(C-F)}$  = 177.9 Hz, CHF), 79.1 (d,  $^2J_{(C-F)}$  = 21.0 Hz, C<sub>q</sub>OHCHF), 31.8 (CH<sub>2</sub>), 29.4 (CH<sub>2</sub>), 29.3 (CH<sub>2</sub>), 29.2 (CH<sub>2</sub>), 28.8 (d,  $^2J_{(C-F)}$  = 21.3 Hz, CH<sub>2</sub>CHF), 25.7 (d,  $^3J_{(C-F)}$  = 2.9 Hz, CH<sub>2</sub>CH<sub>2</sub>CHF), 22.6 (CH<sub>2</sub>), 14.1 (CH<sub>3</sub>); <sup>19</sup>F NMR (470 MHz, CDCl<sub>3</sub>)  $\delta$  -189.4 (ddd,  $^2J_{(H-F)}$  = 47.0 Hz,  $^3J_{(H-F)}$  = 42.7, 14.2 Hz, 1F, CHF); HRMS (ESI)  $m/z$  Calcd for C<sub>22</sub>H<sub>28</sub>FO [M-H]<sup>-</sup> 327.2130; Found: 327.2127.

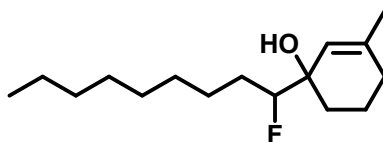

**3ce; 1-(1-fluorononyl)-3-methylcyclohex-2-en-1-ol**

Prepared according to general procedure GP to afford **3ce** as a white waxy solid (dr = 70:30, 104mg, 68%) after column chromatography ( $R_f$  = 0.3, hexane/Et<sub>2</sub>O 8:2); *Inseparable mixture of diastereoisomers*; IR (film)/cm<sup>-1</sup> 3400, 2924, 2855, 1671, 1454, 1377, 1169, 1070, 967; <sup>1</sup>H NMR (500 MHz, CDCl<sub>3</sub>, *mixture of diastereoisomers*)  $\delta$  5.41 (s, 0.4H *minor*, Csp<sup>2</sup>HCOH), 5.34 (s, 1H *major*, Csp<sup>2</sup>HCOH), 4.35–4.21 (m, 1H *major* + 0.4H *minor*, CHFCH<sub>2</sub>), 1.99–1.80 (m, 3H *major* + 1.2H *minor*, CH<sub>2</sub> overlapping OH), 1.80–1.28 (m, 19H *major* + 7.6H *minor*), 0.88 (t,  $J$  = 6.9 Hz, 3H *major* + 1.2H *minor*, CH<sub>3</sub>); <sup>13</sup>C NMR (125 MHz, CDCl<sub>3</sub>, *mixture of diastereoisomers*)  $\delta$  141.1 (d,  $^4J_{(C-F)}$  = 1.0 Hz, Csp<sup>2</sup>CH<sub>3</sub>), 140.8 (d,  $^4J_{(C-F)}$  = 1.6 Hz, Csp<sup>2</sup>CH<sub>3</sub>), 122.6 (d,  $^3J_{(C-F)}$  = 4.5 Hz, Csp<sup>2</sup>COH), 122.4 (d,  $^3J_{(C-F)}$  = 6.7 Hz, Csp<sup>2</sup>COH), 99.9 (d,  $^1J_{(C-F)}$  = 174.0 Hz, CHF), 98.6 (d,  $^1J_{(C-F)}$  = 174.8 Hz, CHF), 71.9 (d,  $^2J_{(C-F)}$  = 20.2 Hz, C<sub>q</sub>OHCHF), 71.6 (d,  $^2J_{(C-F)}$  = 19.6 Hz, C<sub>q</sub>OHCHF), 32.0 (2  $\times$  CH<sub>2</sub>), 31.4 (d,  $^3J_{(C-F)}$  = 3.3 Hz, CH<sub>2</sub>COH), 30.5 (d,  $^3J_{(C-F)}$  = 3.3 Hz, CH<sub>2</sub>COH), 30.5 (2  $\times$  CH<sub>2</sub>), 30.3 (2  $\times$  CH<sub>2</sub>), 29.7 (2  $\times$  CH<sub>2</sub>), 29.6 (2  $\times$  CH<sub>2</sub>), 29.3 (d,  $^2J_{(C-F)}$  = 21.6 Hz, 2  $\times$  CH<sub>2</sub>CHF), 26.1 (d,  $^3J_{(C-F)}$  = 2.4 Hz, CH<sub>2</sub>CH<sub>2</sub>CHF), 26.0 (d,  $^3J_{(C-F)}$  = 2.8 Hz, CH<sub>2</sub>CH<sub>2</sub>CHF), 24.1 (2  $\times$  CH<sub>3</sub>Csp<sup>2</sup>) 22.8 (2  $\times$  CH<sub>2</sub>), 18.9 (2  $\times$  CH<sub>2</sub>), 18.6 (2  $\times$  CH<sub>2</sub>), 14.3 (2  $\times$  CH<sub>3</sub>); <sup>19</sup>F NMR (470 MHz, CDCl<sub>3</sub>, *mixture*

of diastereoisomers)  $\delta$  -194.4 – -193.1 (m, 1F major, CHF), -196.2 (ddd,  $^2J_{(H-F)} = 47.9$  Hz,  $^3J_{(H-F)} = 42.4$ , 15.2 Hz, 0.4F minor, CHF); HRMS (ESI) m/z Calcd for C<sub>16</sub>H<sub>29</sub>FNaO [M+Na]<sup>+</sup> 279.2095; Found: 279.2106.

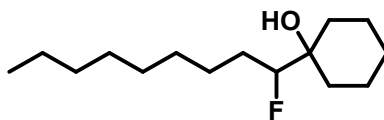

**3cf; 1-(1-fluorononyl)cyclohexan-1-ol**

Prepared according to general procedure GP to afford **3cf** as a white waxy solid (107 mg, 73%) after column chromatography ( $R_f = 0.4$ , hexane/EtOAc 95:5); IR (film)/cm<sup>-1</sup> 3436, 2987, 2956, 1450, 1378, 1258, 974, 905; <sup>1</sup>H NMR (500 MHz, CDCl<sub>3</sub>)  $\delta$  4.26–4.14 (m, 1H, CHFCH<sub>2</sub>), 1.71–1.62 (m, 5H, CHHCHF overlapping with CHHCH<sub>2</sub>CHF, CHHCOH and CH<sub>2</sub>), 1.58–1.48 (m, 1H, CHHCHF overlapping with O–H, CHHCOH, CHHCH<sub>2</sub>CHF and 2 × CH<sub>2</sub>), 1.41–1.19 (m, 12H, 2 × CHHCOH overlapping with 5 × CH<sub>2</sub>), 0.88 (t,  $J = 6.8$  Hz, 3H, CH<sub>3</sub>); <sup>13</sup>C NMR (125 MHz, CDCl<sub>3</sub>)  $\delta$  99.8 (d,  $^1J_{(C-F)} = 171.7$  Hz, CHF), 72.6 (d,  $^2J_{(C-F)} = 19.5$  Hz, C<sub>q</sub>OHCHF), 33.5 (d,  $^3J_{(C-F)} = 4.2$  Hz, CH<sub>2</sub>COH), 32.3 (d,  $^3J_{(C-F)} = 3.7$  Hz, CH<sub>2</sub>COH), 32.0 (CH<sub>2</sub>), 29.7 (CH<sub>2</sub>), 29.6 (CH<sub>2</sub>), 29.4 (CH<sub>2</sub>), 28.8 (d,  $^2J_{(C-F)} = 21.7$  Hz, CH<sub>2</sub>CHF), 26.0 (d,  $^3J_{(C-F)} = 2.9$  Hz, CH<sub>2</sub>CH<sub>2</sub>CHF), 25.9 (CH<sub>2</sub>), 22.8 (CH<sub>2</sub>), 21.4 (2 × CH<sub>2</sub>), 14.3 (CH<sub>3</sub>); <sup>19</sup>F NMR (470 MHz, CDCl<sub>3</sub>)  $\delta$  -189.4 (ddd,  $^2J_{(H-F)} = 47.0$  Hz,  $^3J_{(H-F)} = 42.7$ , 14.2 Hz, 1F, CHF); HRMS (ESI) m/z Calcd for C<sub>15</sub>H<sub>29</sub>FNaO [M+Na]<sup>+</sup> 267.2095; Found: 267.2079.

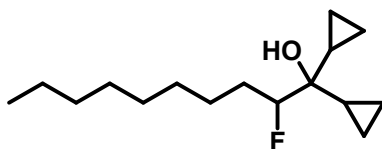

**3ck; 1,1-dicyclopropyl-2-fluorodecan-1-ol**

Prepared according to general procedure GP to afford **3ck** as (100 mg, 65%) after column chromatography ( $R_f = 0.5$ , hexane/Et<sub>2</sub>O 9:1); IR (film)/cm<sup>-1</sup> 3494, 2925, 2855, 1465, 1378, 1023, 914, 827; <sup>1</sup>H NMR (500 MHz, CDCl<sub>3</sub>)  $\delta$  4.36 (ddd,  $^2J_{(H-F)} = 49.0$  Hz,  $^3J_{(H-H)} = 10.4$ , 2.2 Hz, 1H, CHFCH<sub>2</sub>), 1.83–1.75 (m, 2H, CH<sub>2</sub>), 1.71–1.56 (m, 2H, CHHCHF overlapping with, CHHCH<sub>2</sub>CHF), 1.55 (s, 1H, O–H), 1.43–1.25 (m, 10H, CHHCHF overlapping with CHHCH<sub>2</sub>CHF and 4 × CH<sub>2</sub>), 0.92–0.86 (m, 4H, CH<sub>3</sub> overlapping with CHCOH), 0.79–0.73 (m, 1H, CHCOH), 0.49–0.29 (m, 8H, 4 × CH<sub>2</sub>); <sup>13</sup>C NMR (125 MHz, CDCl<sub>3</sub>)  $\delta$  100.7 (d,  $^1J_{(C-F)} = 174.6$  Hz, CHF), 71.9 (d,  $^2J_{(C-F)} = 18.6$  Hz, C<sub>q</sub>OHCHF), 32.0 (CH<sub>2</sub>), 30.0 (d,  $^2J_{(C-F)} = 21.4$  Hz, CH<sub>2</sub>CHF), 29.7 (2 × CH<sub>2</sub>), 29.4 (CH<sub>2</sub>), 29.6 (CH<sub>2</sub>), 29.4 (CH<sub>2</sub>), 26.2 (d,  $^3J_{(C-F)} = 2.6$  Hz, CH<sub>2</sub>CH<sub>2</sub>CHF), 22.8 (CH<sub>2</sub>), 15.1 (d,  $^3J_{(C-H)} = 4.7$  Hz, CHCOH), 14.6 (d,  $^3J_{(C-H)} = 3.6$  Hz, CHCOH), 14.3 (CH<sub>3</sub>), 0.8 (CH<sub>2</sub>), 0.4 (d,  $^4J_{(C-F)} = 0.8$  Hz, CH<sub>2</sub>), -0.7 (CH<sub>2</sub>), -0.9 (CH<sub>2</sub>); <sup>19</sup>F NMR (470 MHz, CDCl<sub>3</sub>)  $\delta$  -193.0 (ddd,  $^2J_{(H-F)} = 49.0$  Hz,  $^3J_{(H-F)} = 42.5$ , 15.7 Hz, 1F, CHF); HRMS (ESI) m/z Calcd for C<sub>16</sub>H<sub>29</sub>FNaO [M+Na]<sup>+</sup> 279.2095; Found: 279.2118.

## 5. Copy of $^1\text{H}$ , $^{13}\text{C}$ and $^{19}\text{F}$ NMR spectra for compounds 3aa-3ck

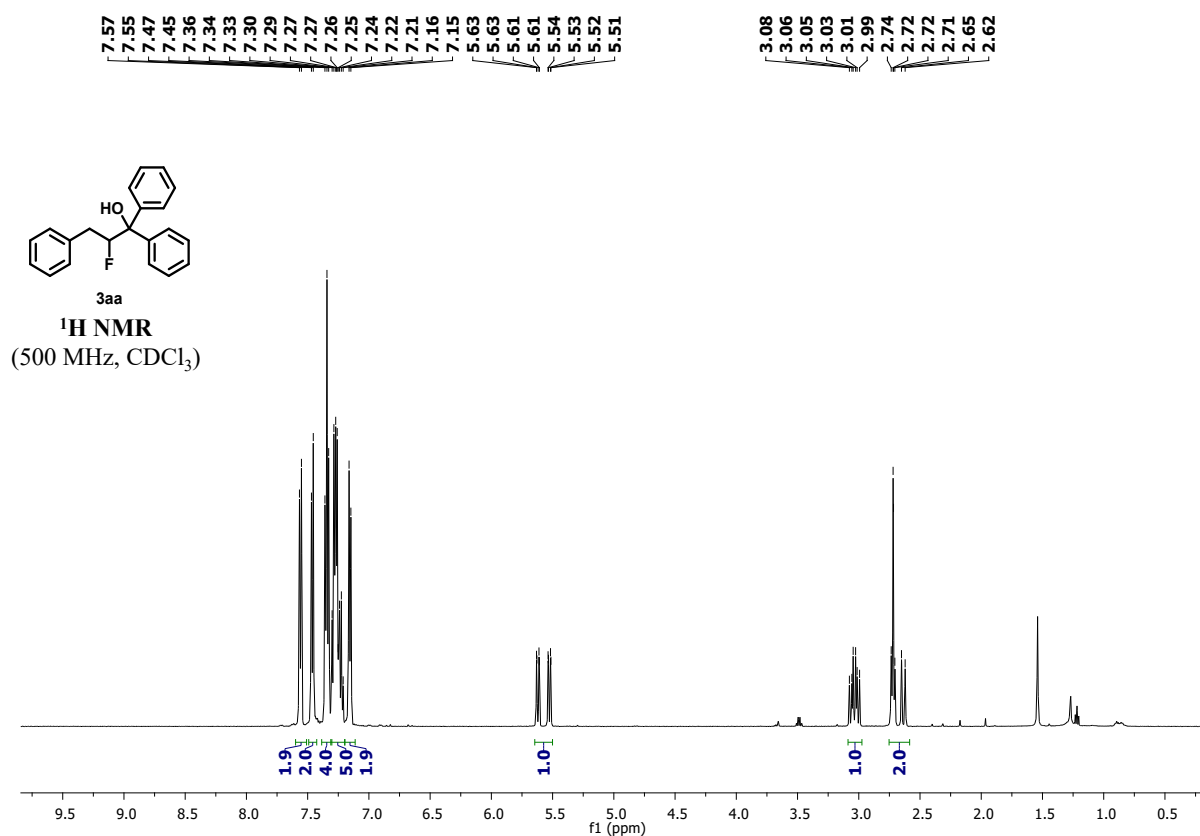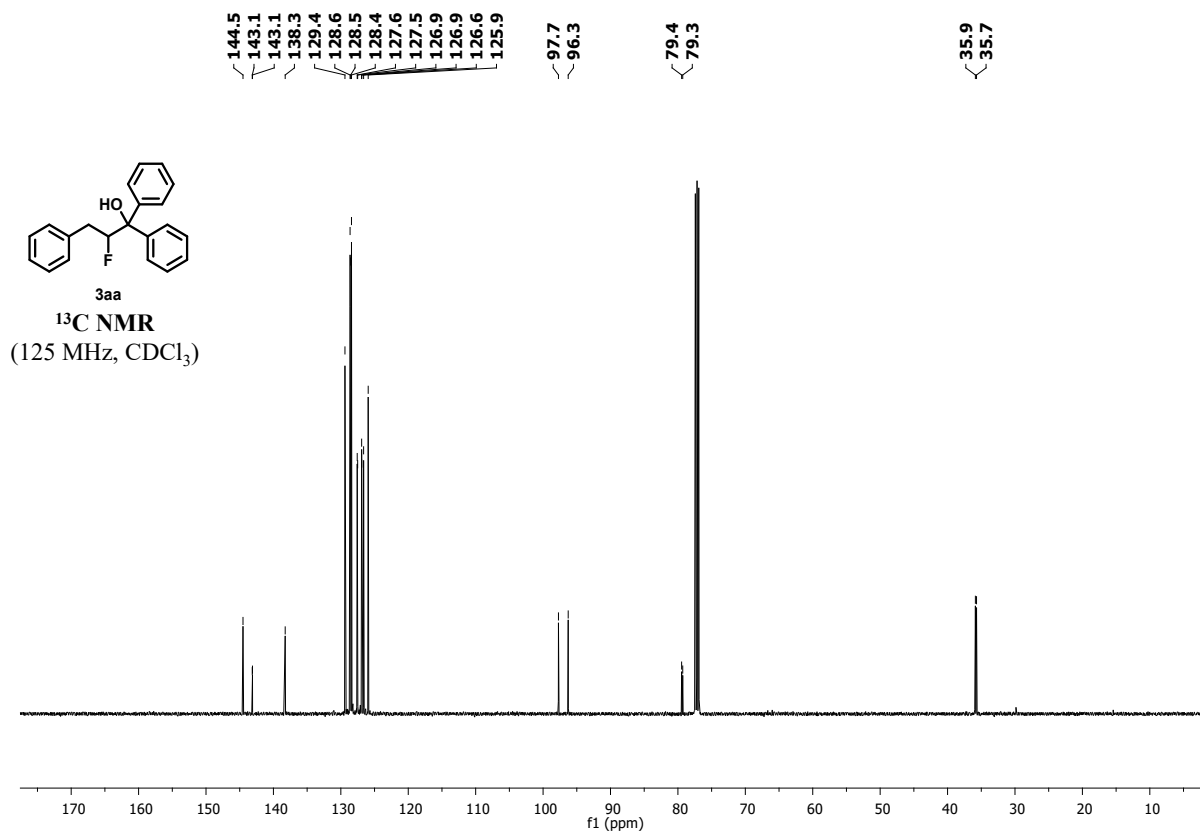



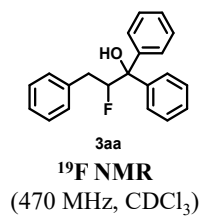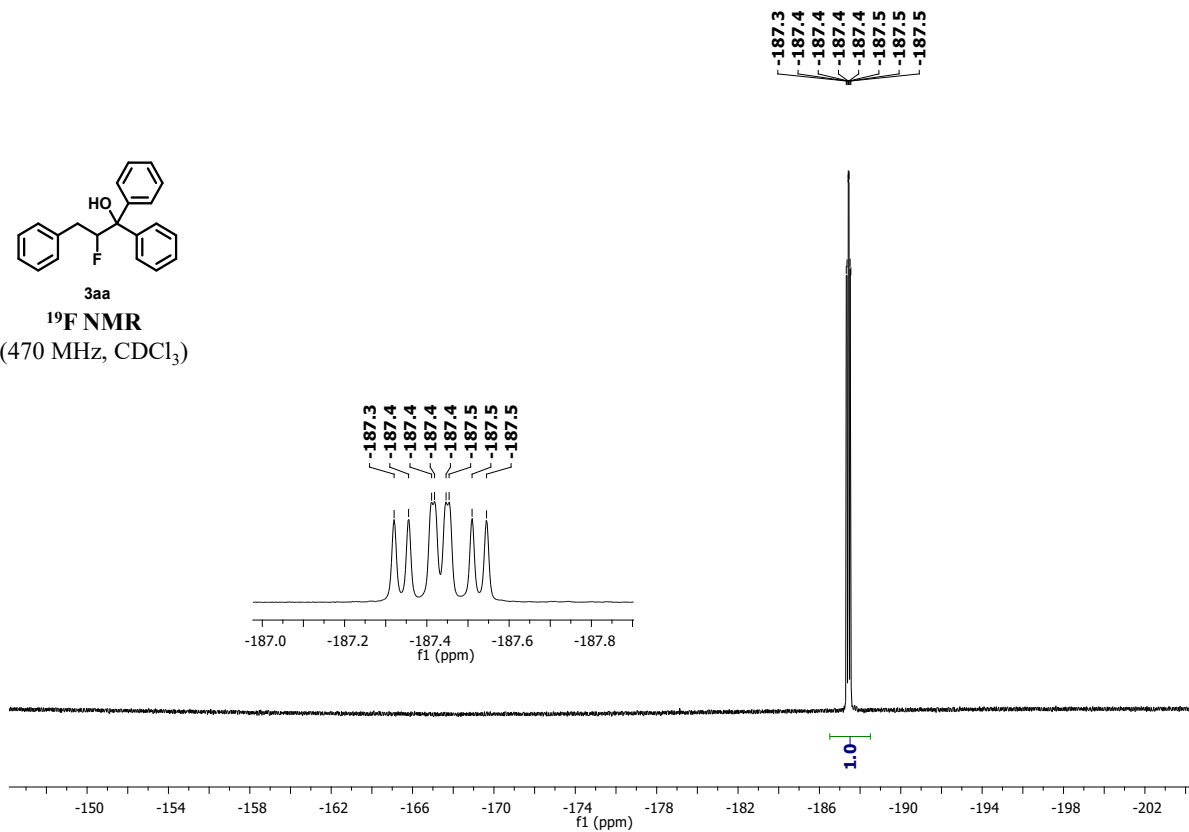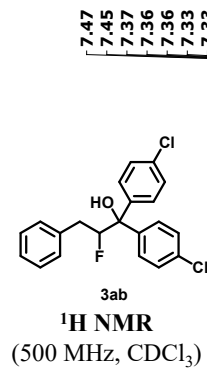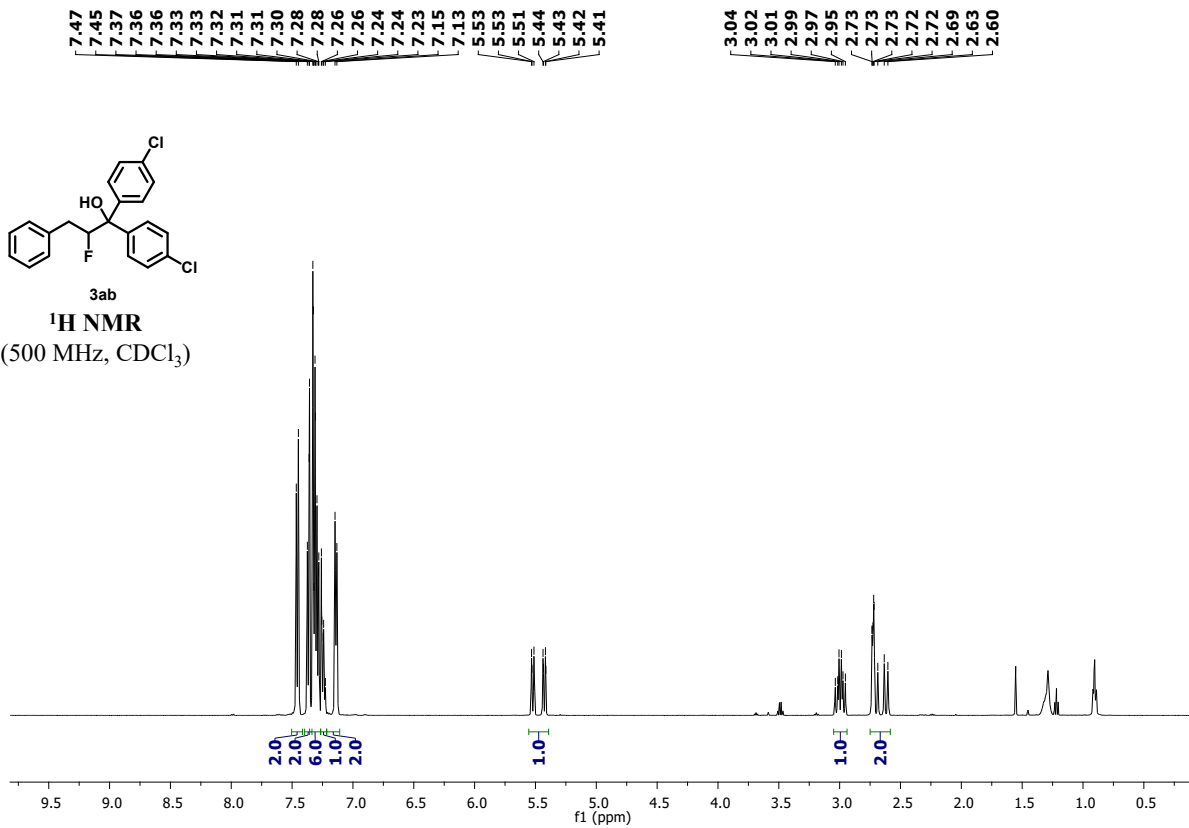

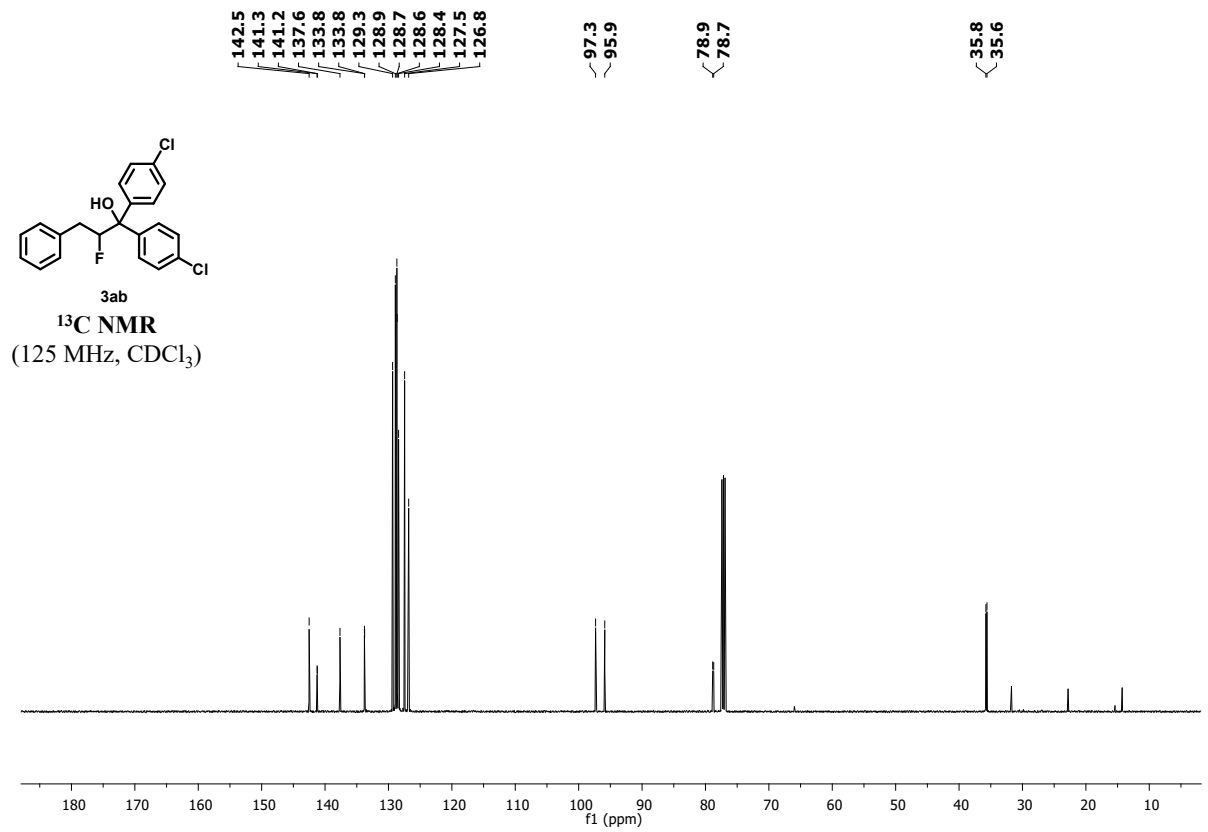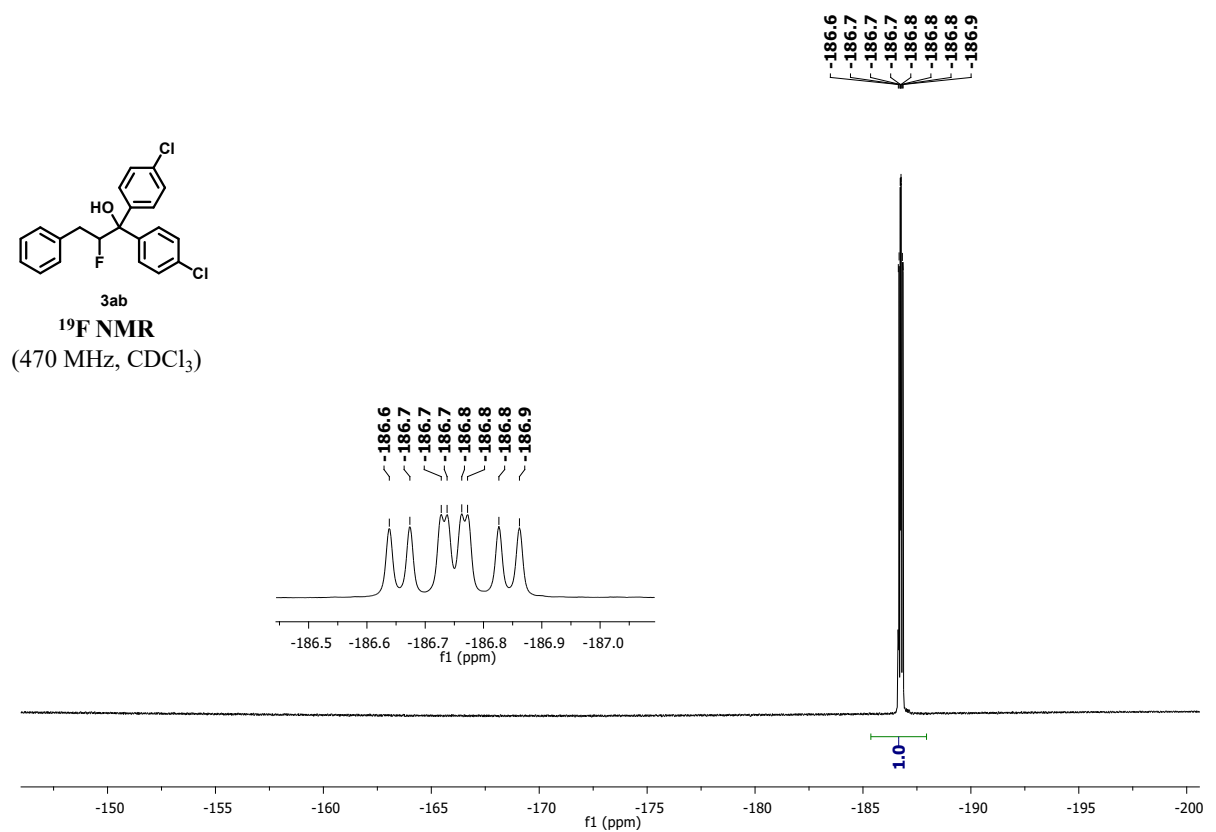

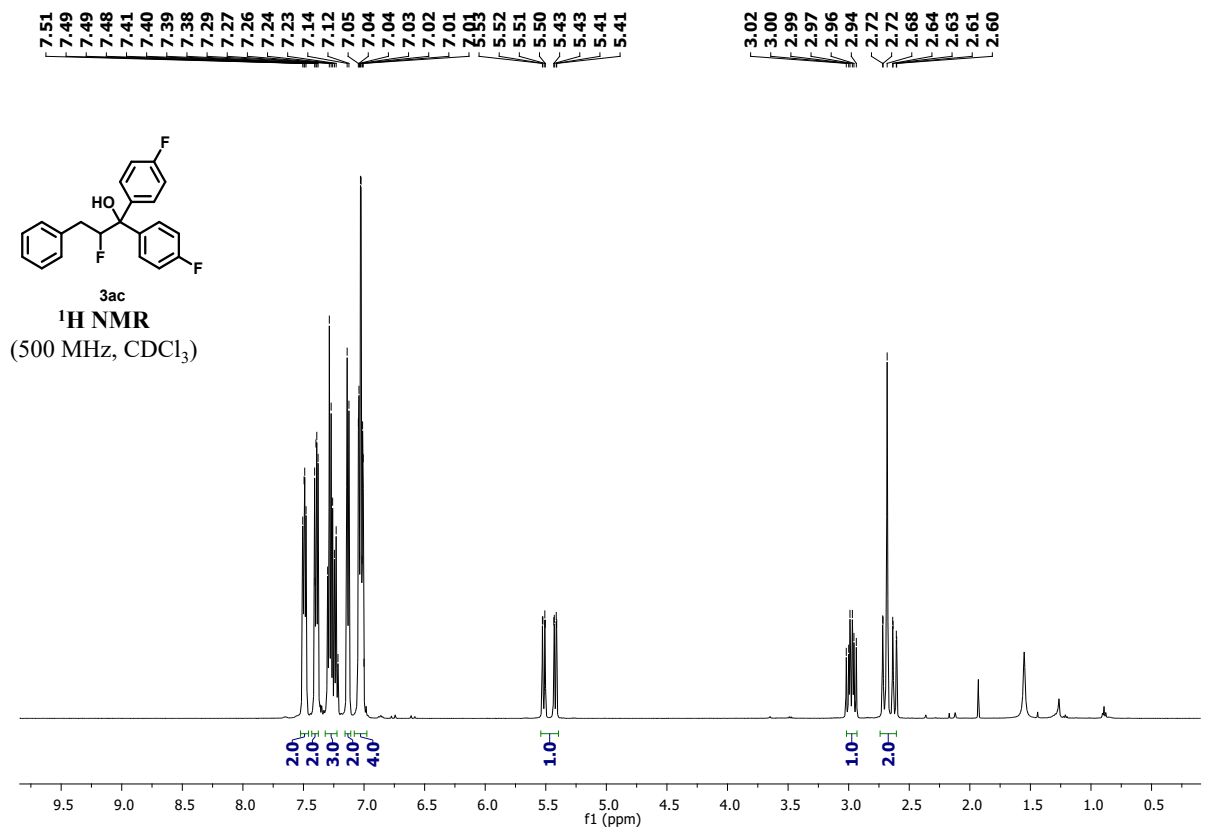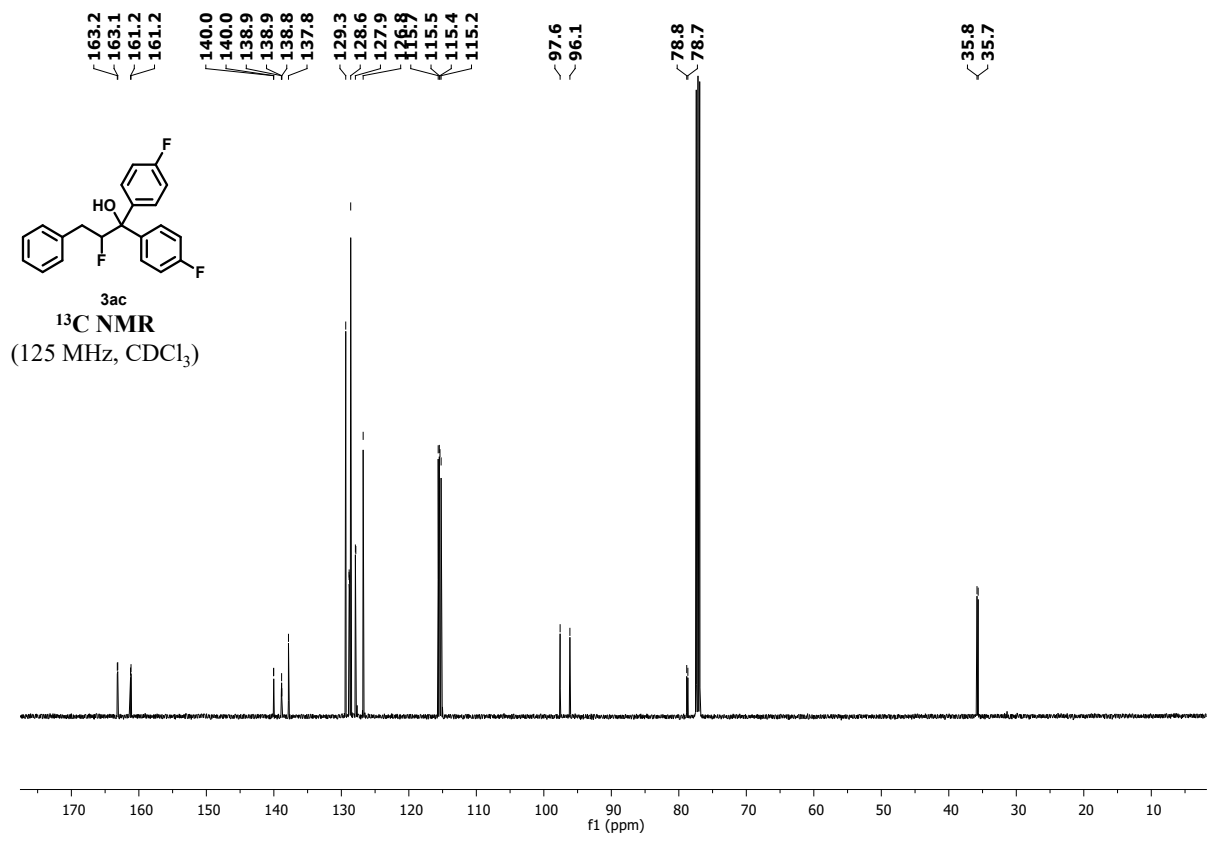



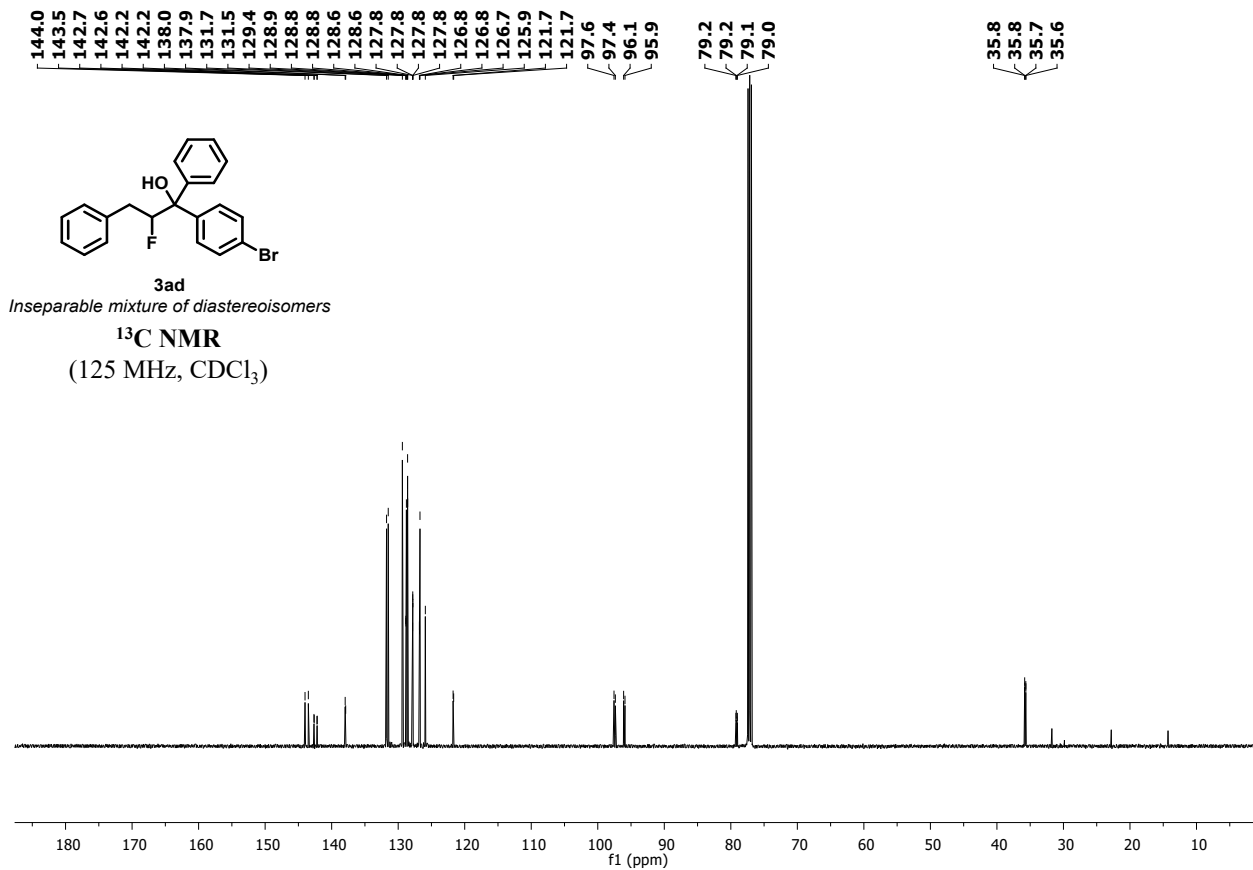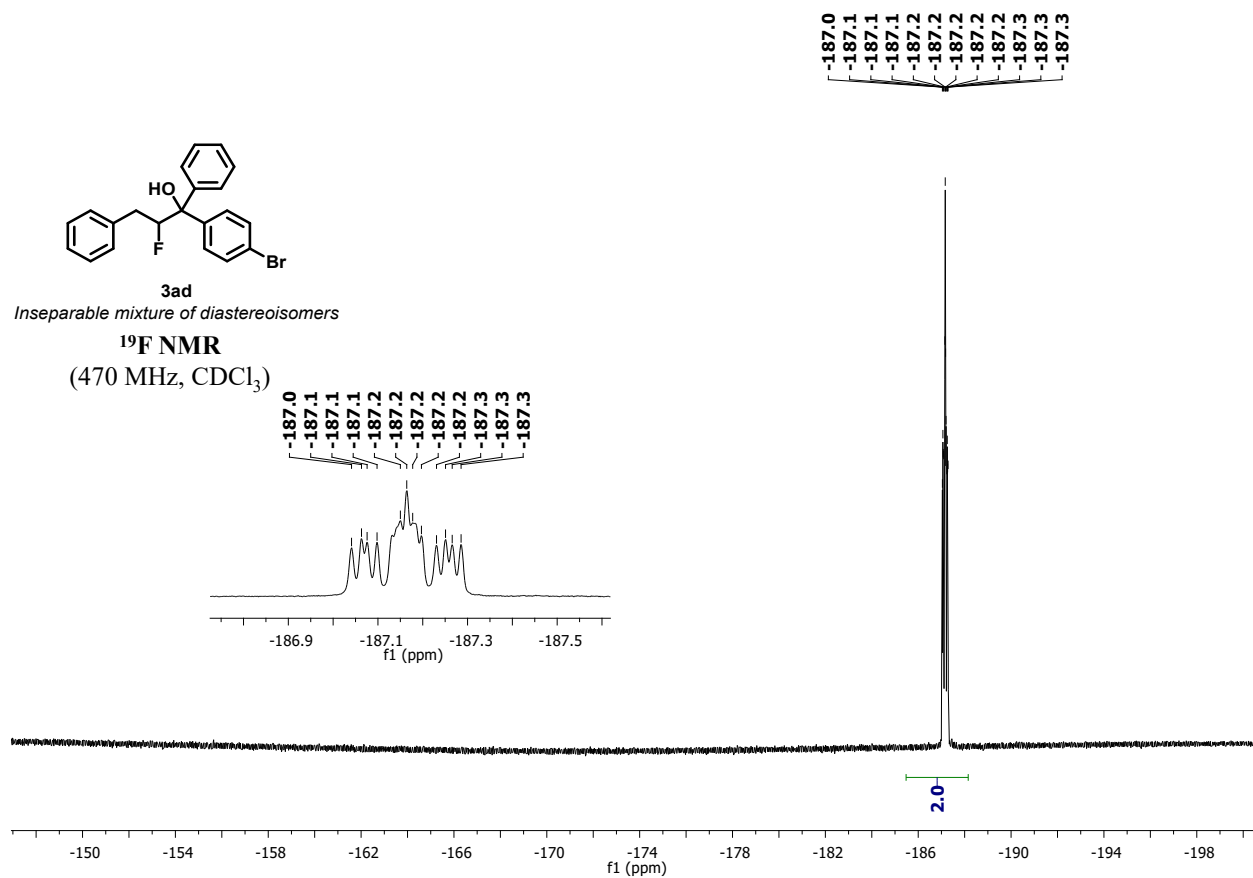

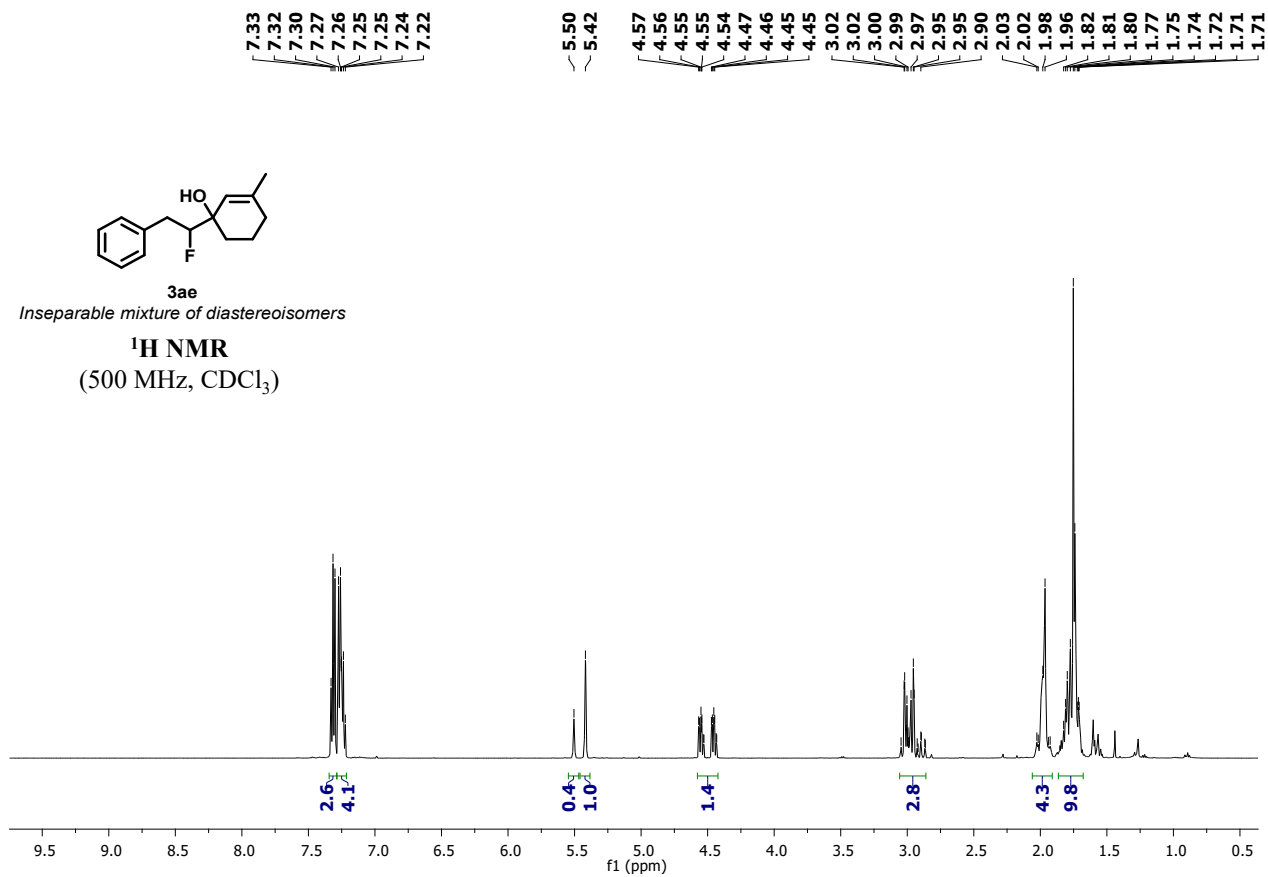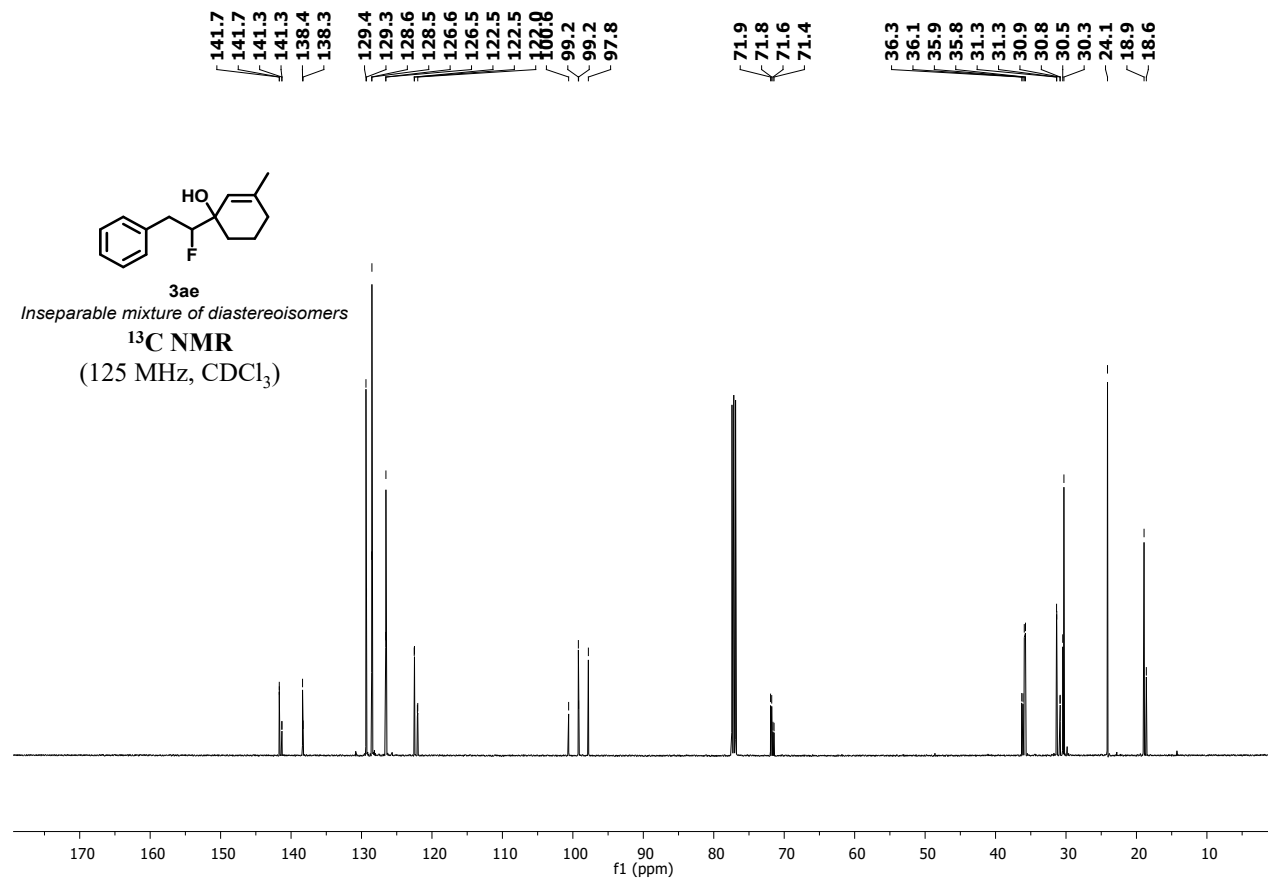

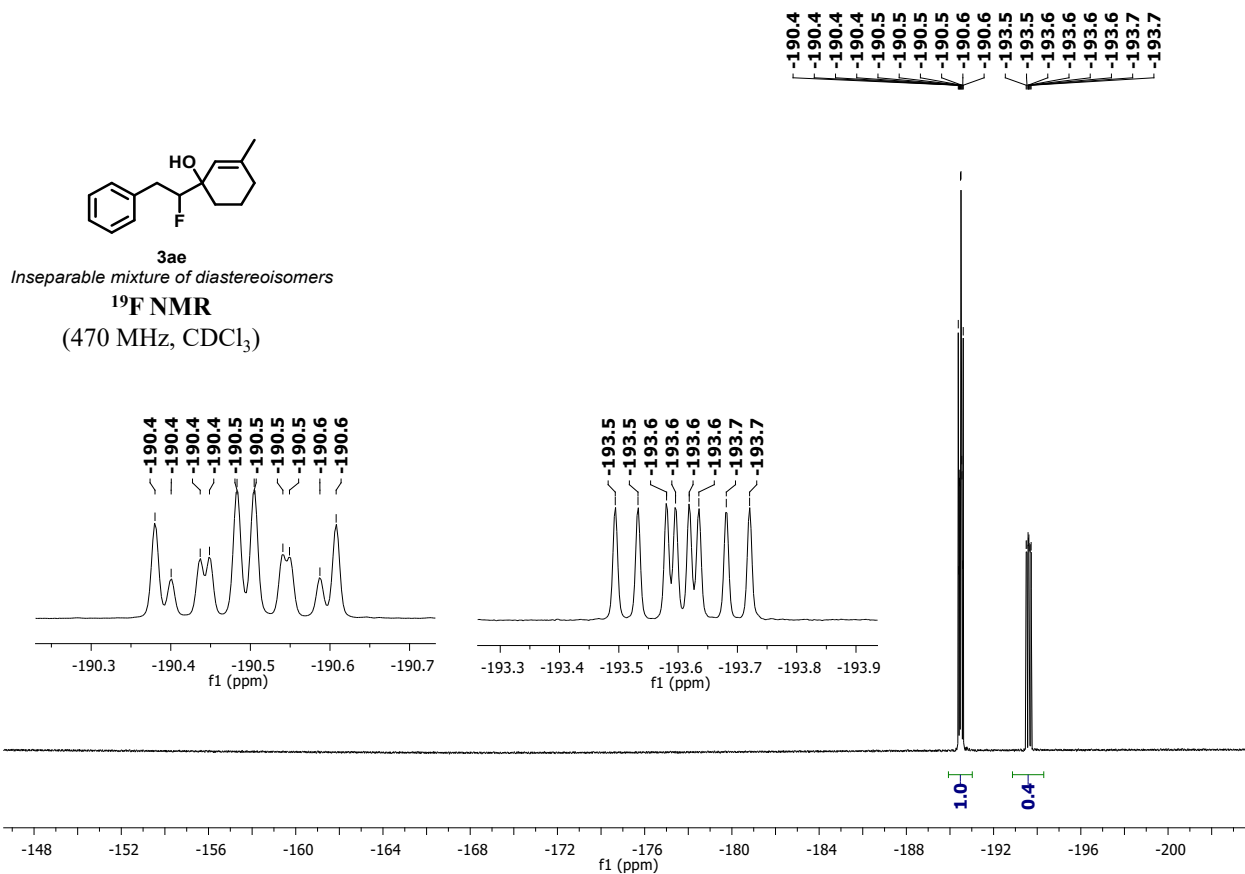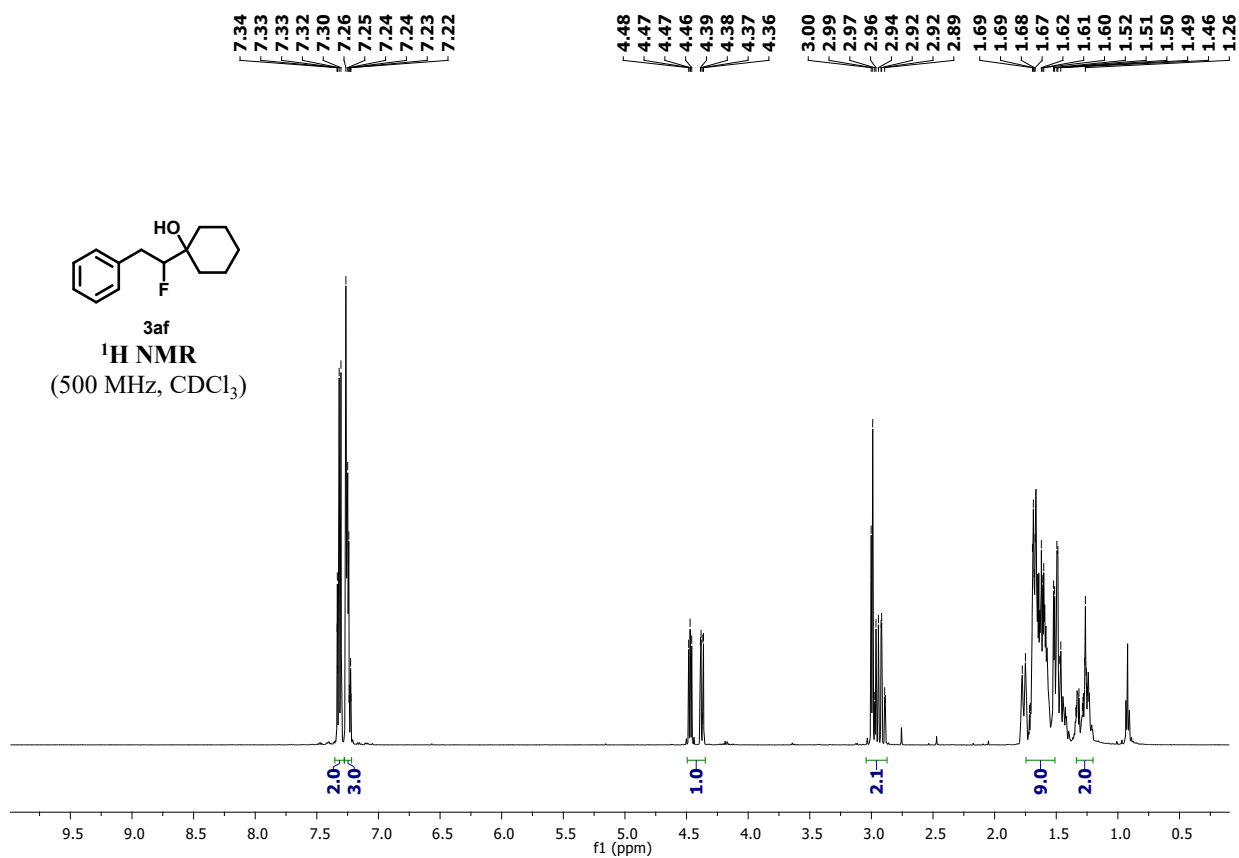

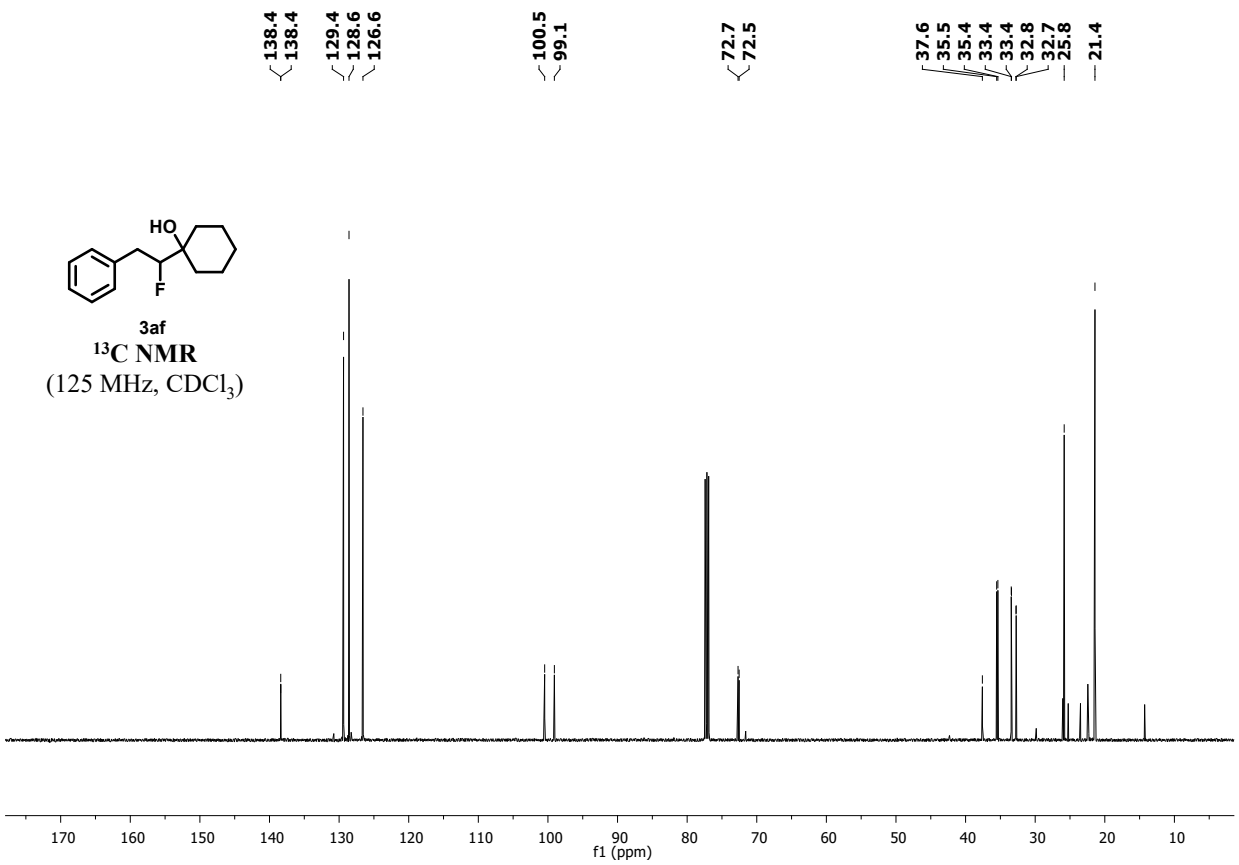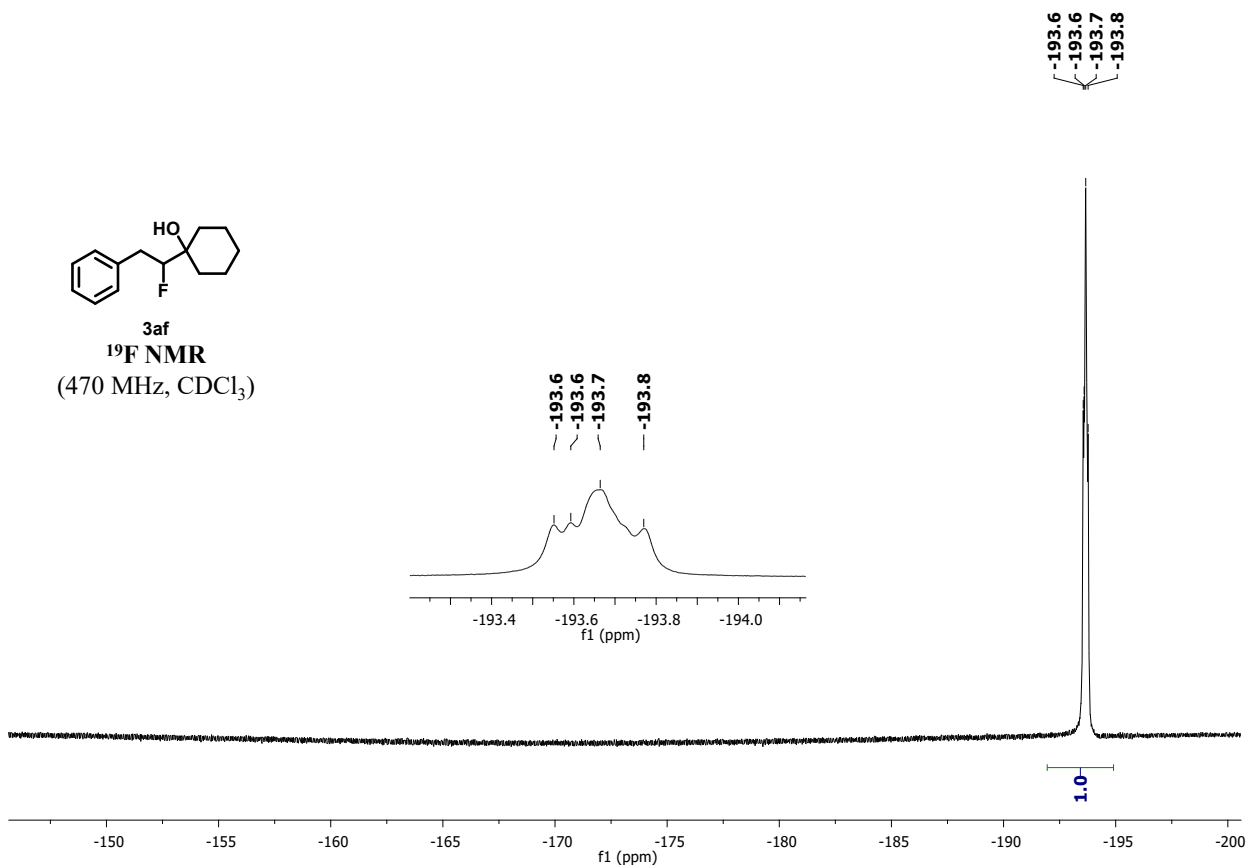





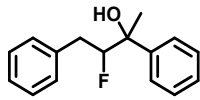

**3ag**

*Inseparable mixture of diastereoisomers*

**<sup>19</sup>F NMR**

(470 MHz, CDCl<sub>3</sub>)

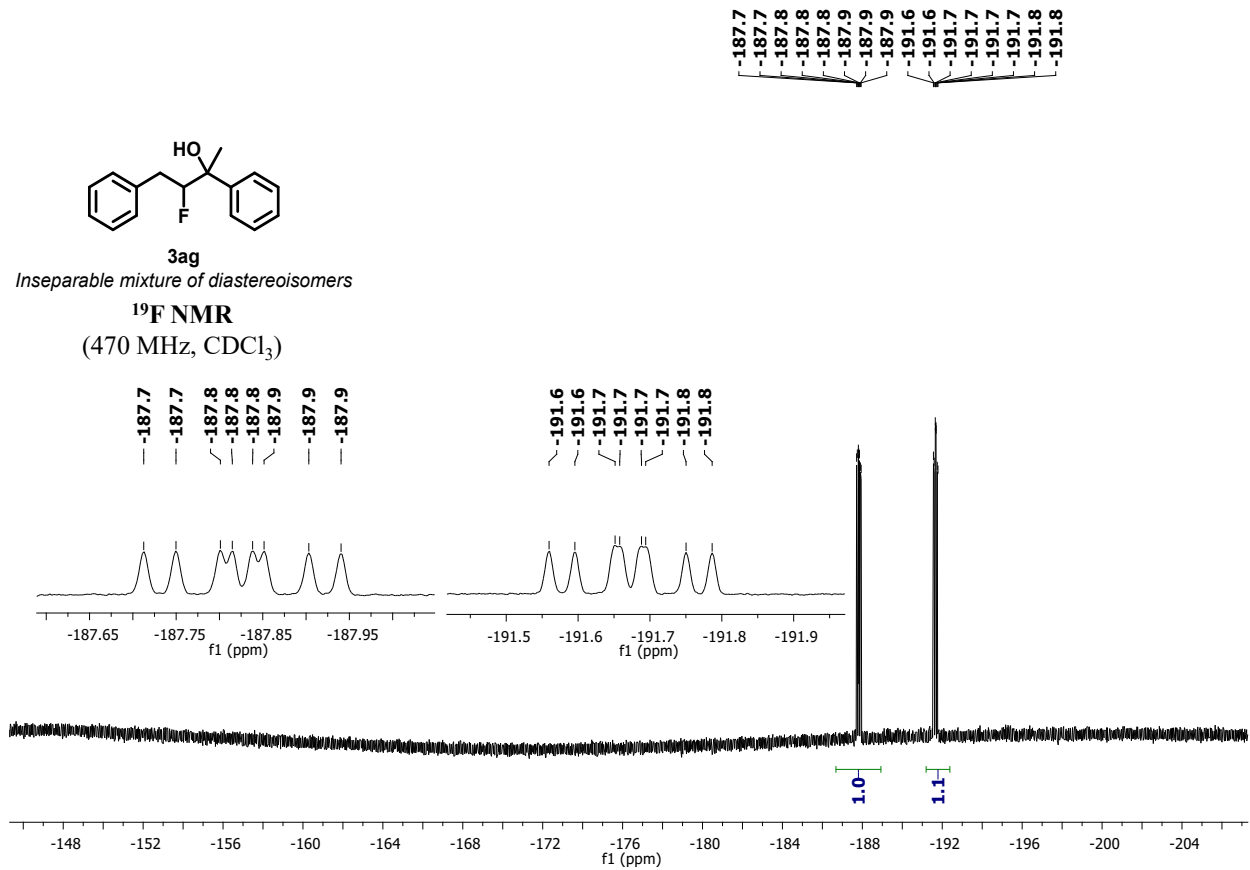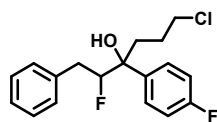

**3ah major**

**<sup>1</sup>H NMR**

(500 MHz, CDCl<sub>3</sub>)

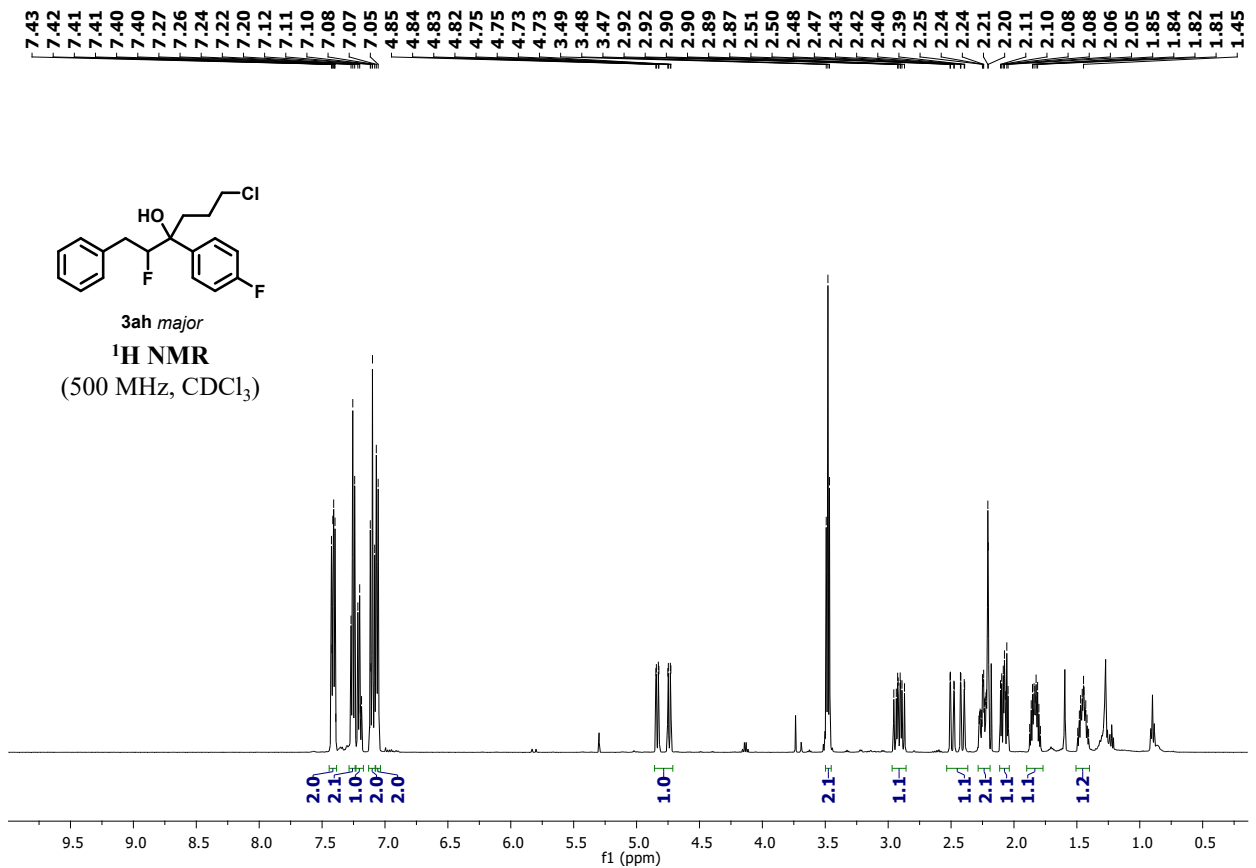

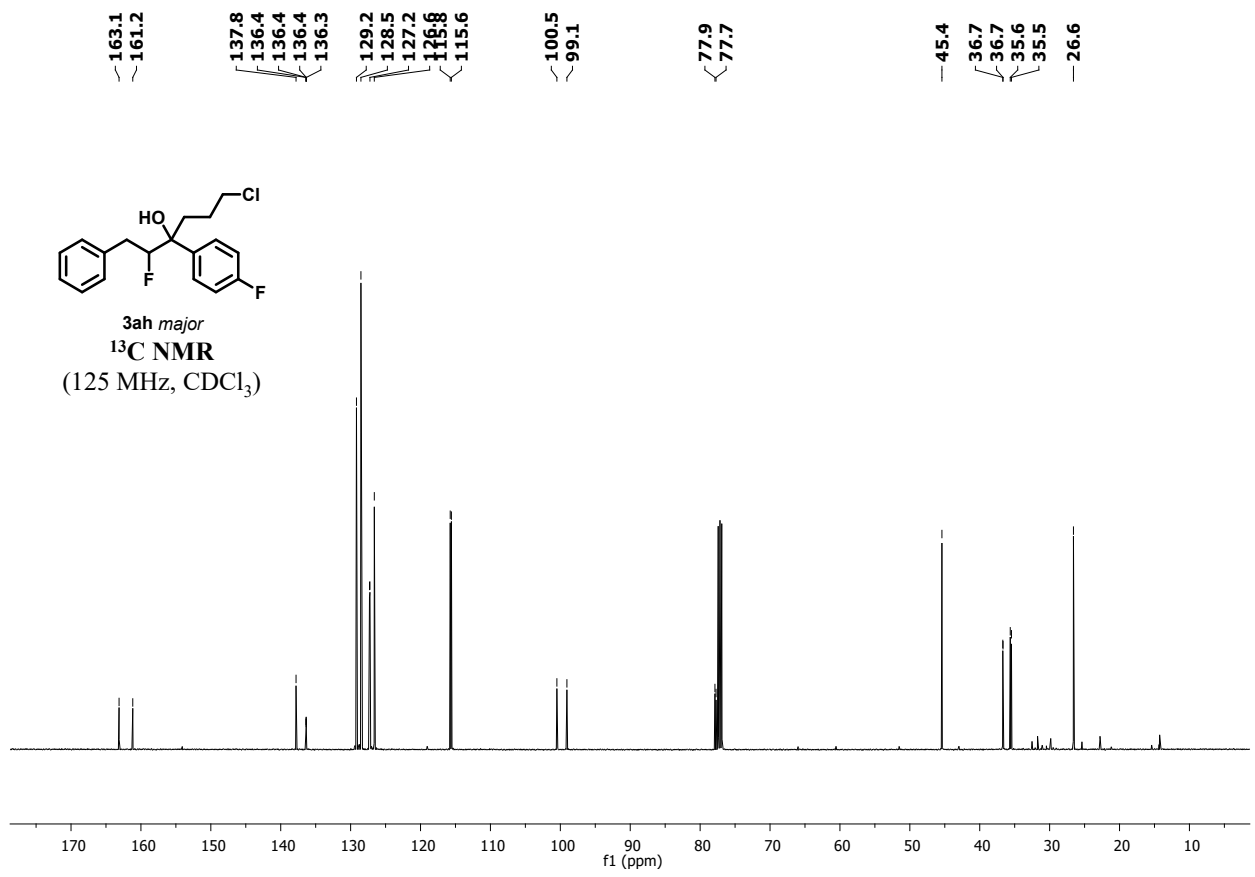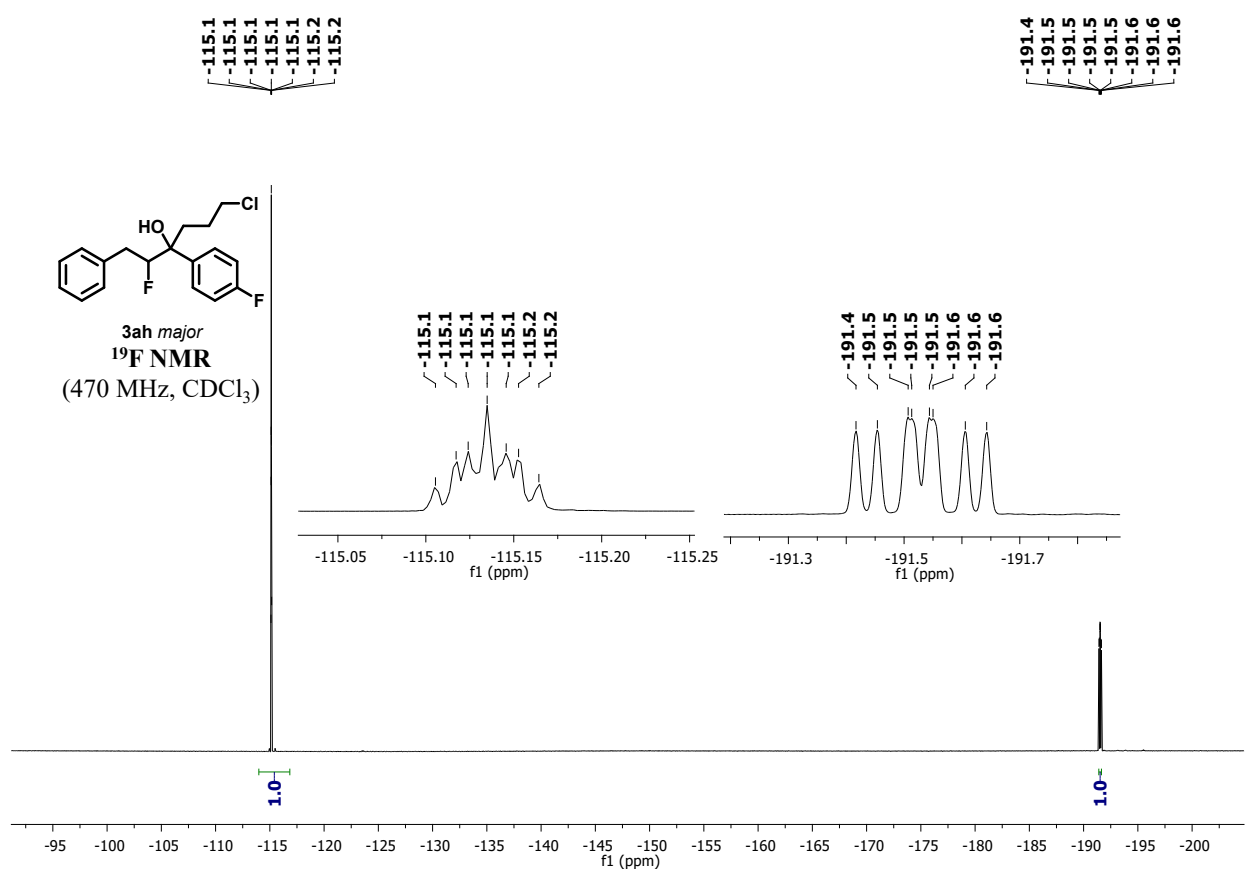

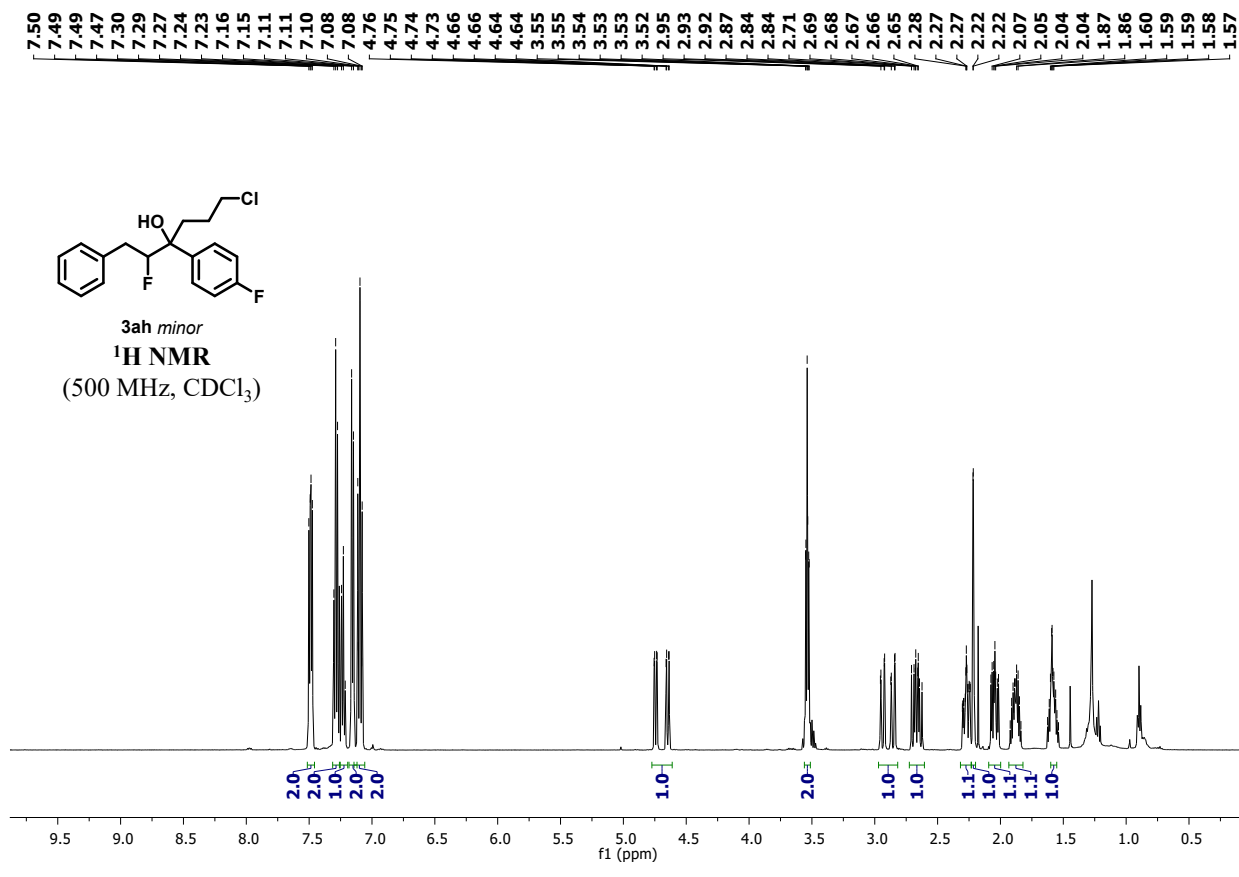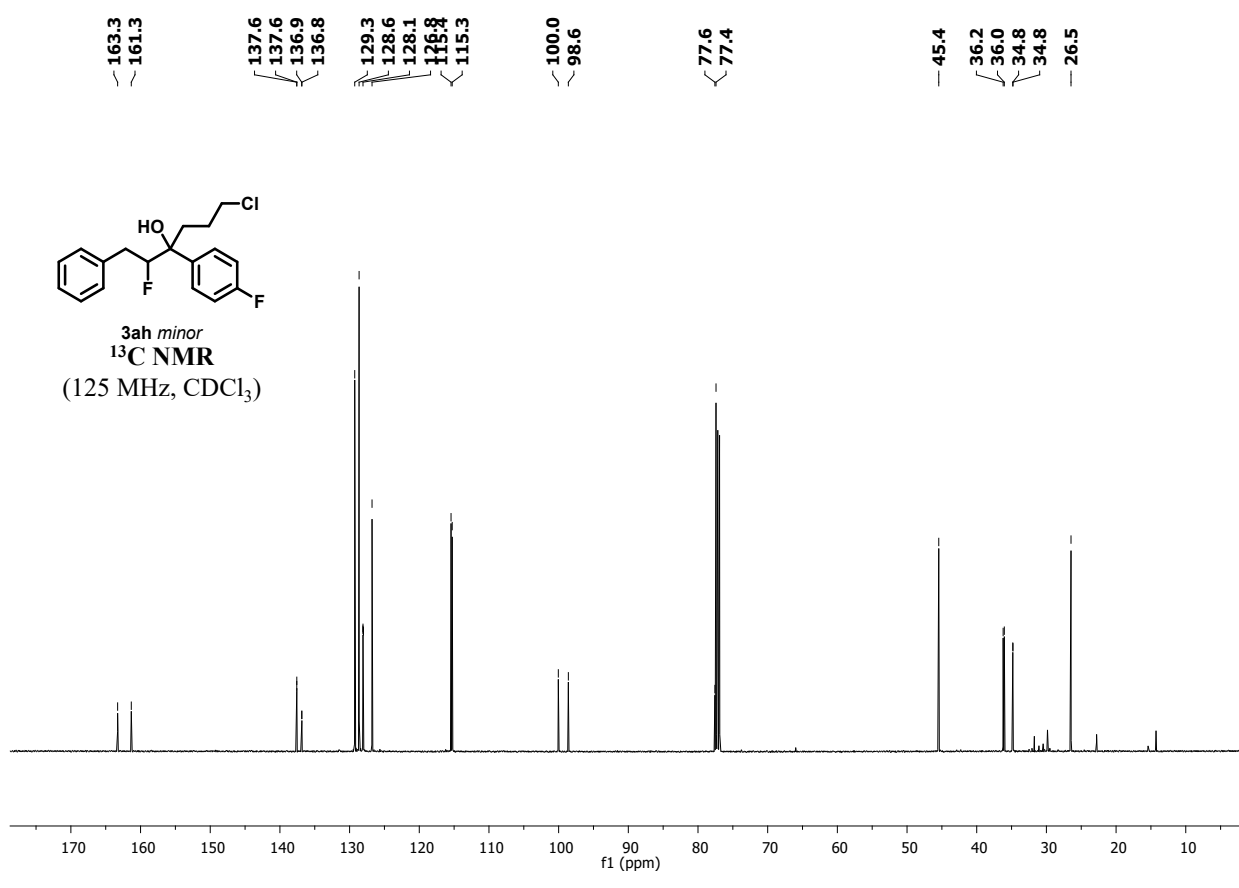

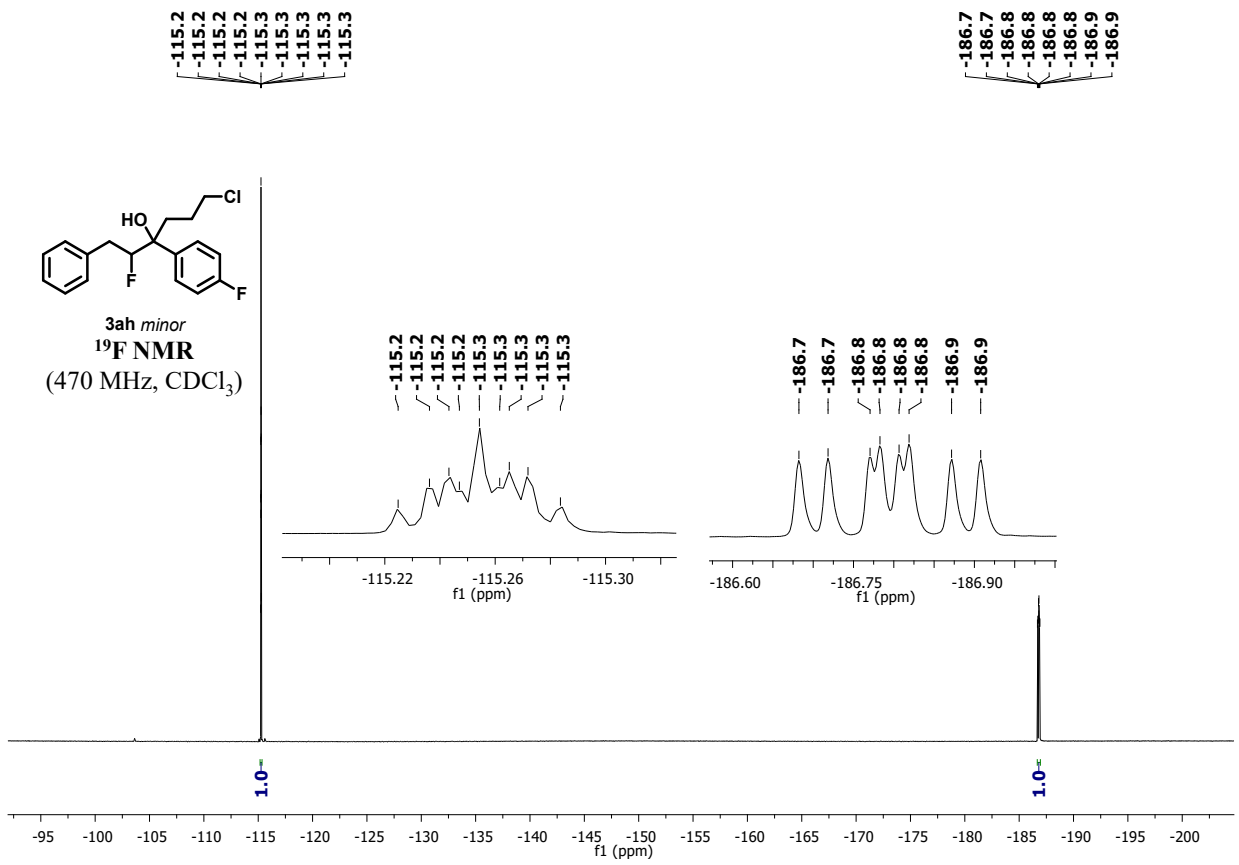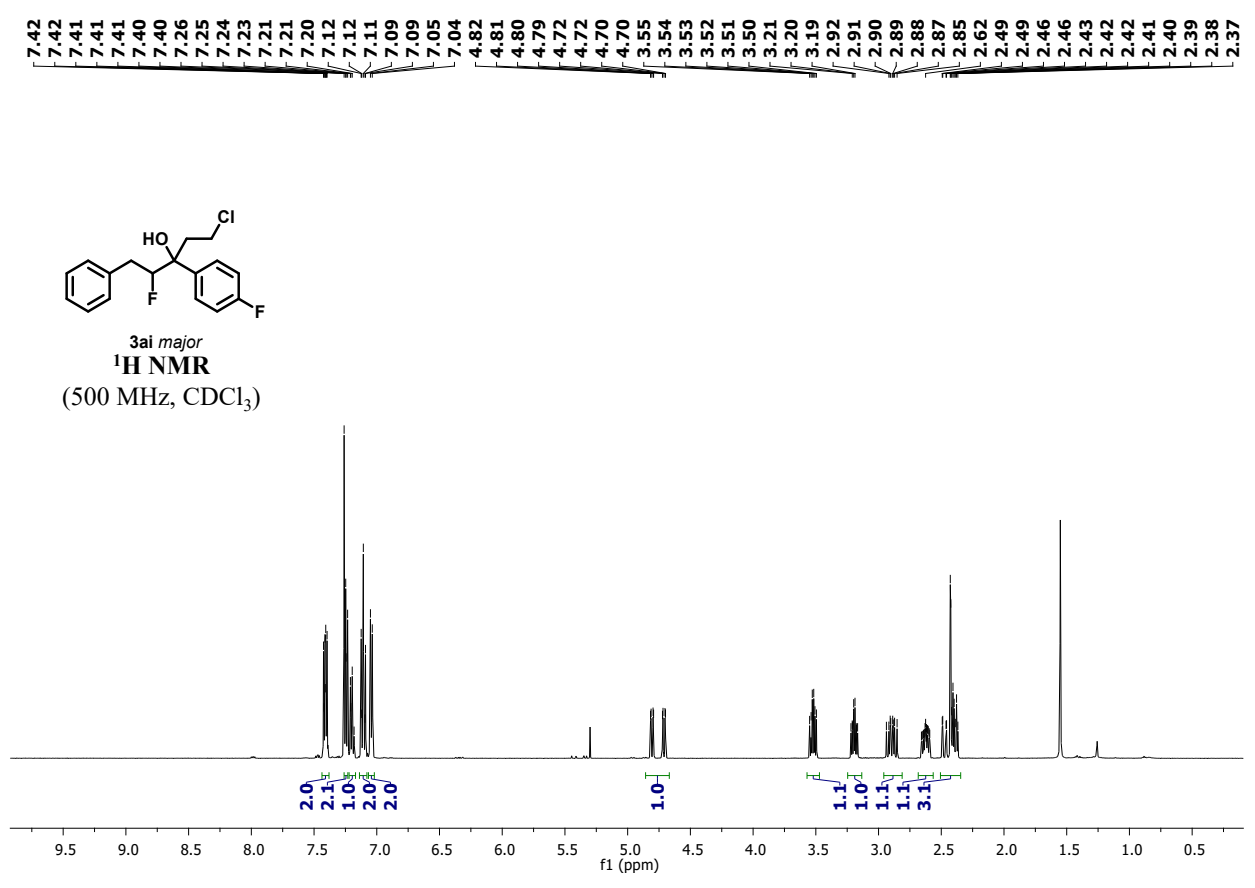

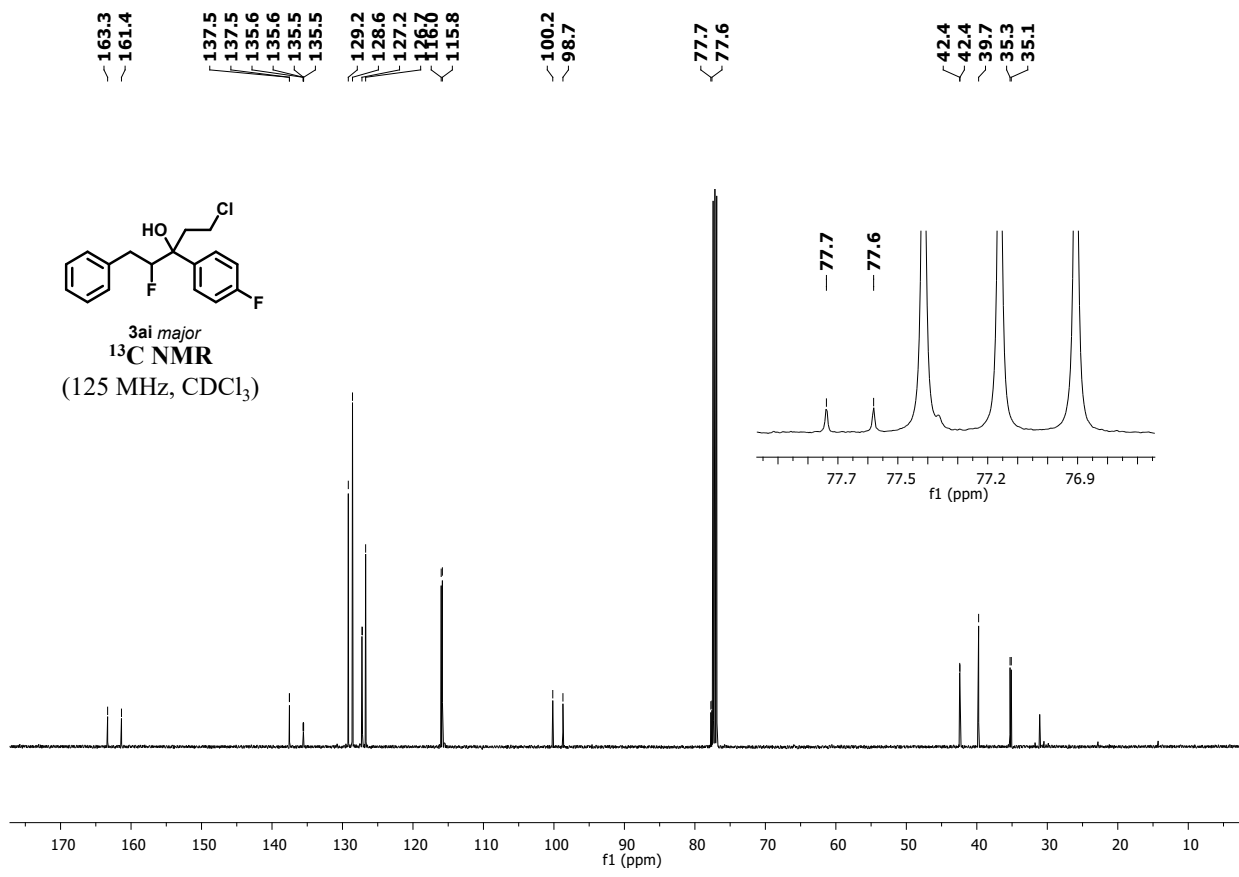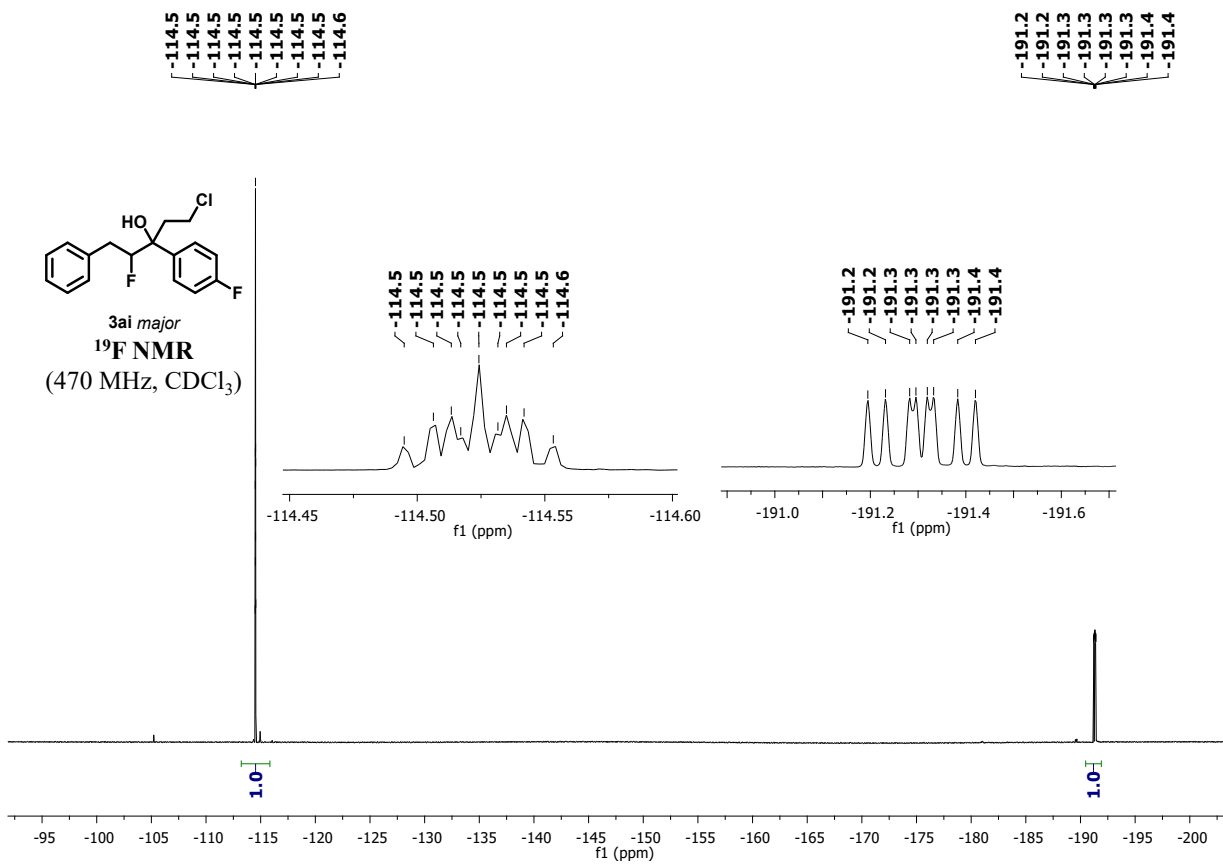

7.51  
7.50  
7.50  
7.49  
7.30  
7.28  
7.27  
7.24  
7.22  
7.15  
7.13  
7.13  
7.11  
7.09  
4.75  
4.74  
4.74  
4.73  
4.72  
4.65  
4.65  
4.63  
4.63  
3.58  
3.58  
3.57  
3.56  
3.56  
3.55  
3.54  
3.45  
3.43  
3.43  
3.42  
3.42  
3.41  
3.41  
3.40  
3.40  
2.95  
2.92  
2.92  
2.87  
2.84  
2.83  
2.71  
2.63  
2.62  
2.61  
2.60  
2.58  
2.57  
2.56  
2.55  
2.54  
2.46  
2.44  
2.43  
2.41

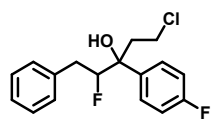

**<sup>1</sup>H NMR**  
(500 MHz, CDCl<sub>3</sub>)

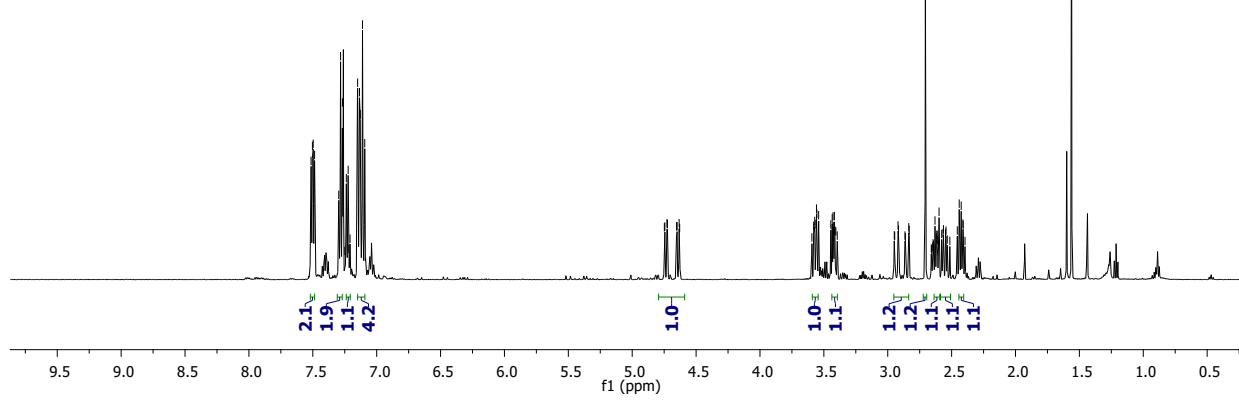

163.5  
161.5  
137.4  
137.4  
136.0  
135.9  
129.3  
128.7  
128.1  
116.8  
115.5  
99.6  
98.2  
77.6  
77.5  
40.3  
40.3  
40.2  
36.0  
35.9

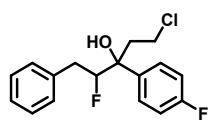

**<sup>13</sup>C NMR**  
(125 MHz, CDCl<sub>3</sub>)

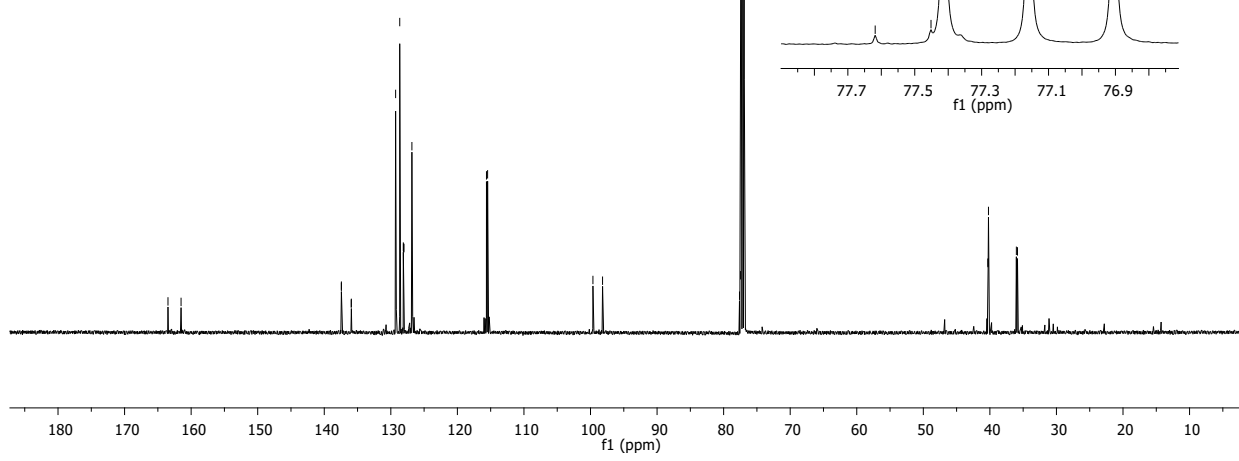

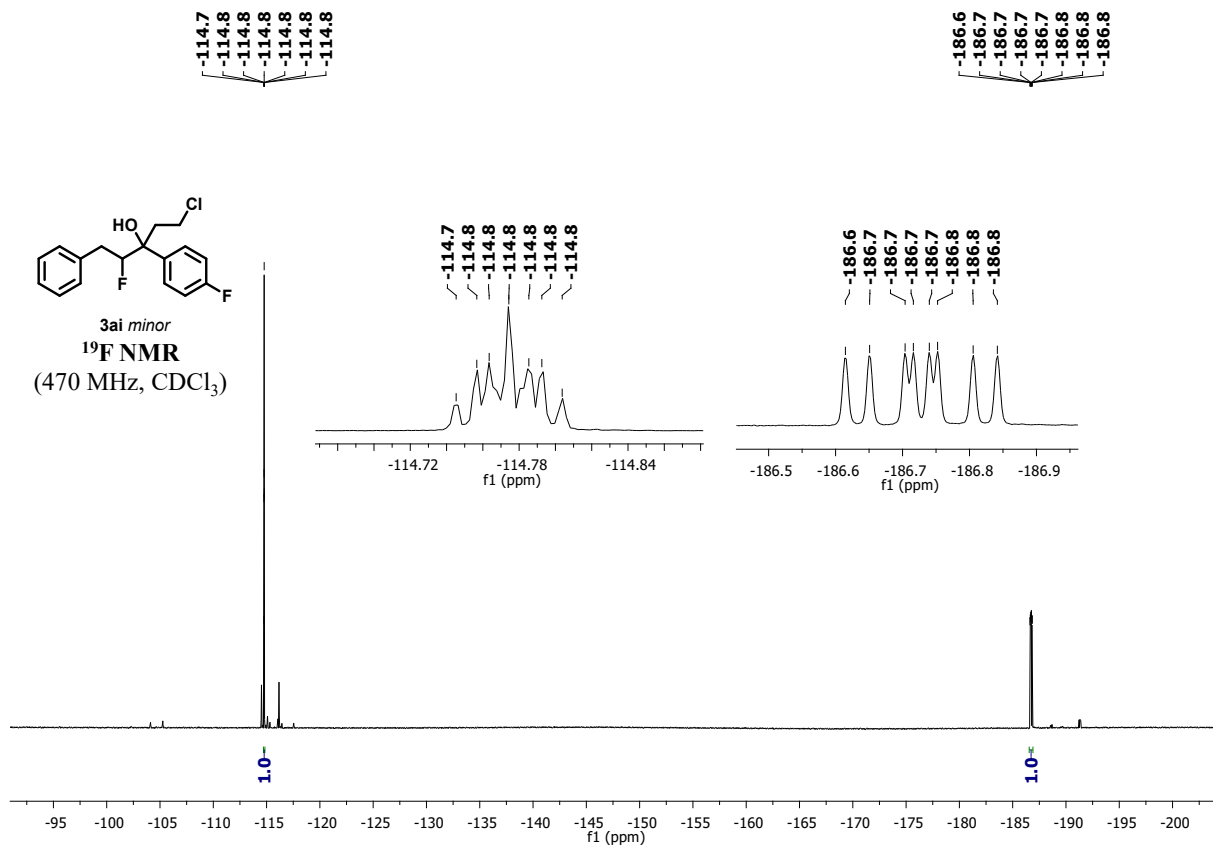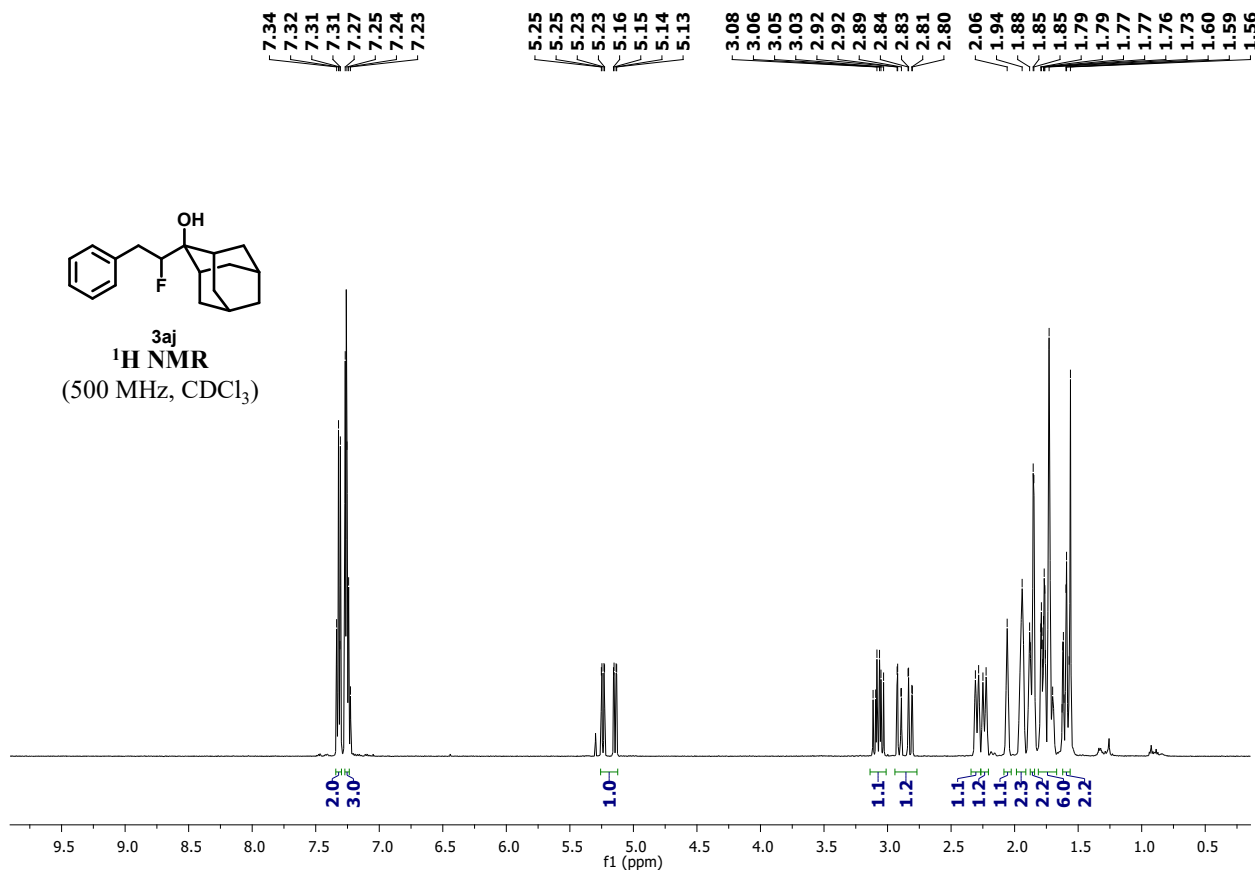



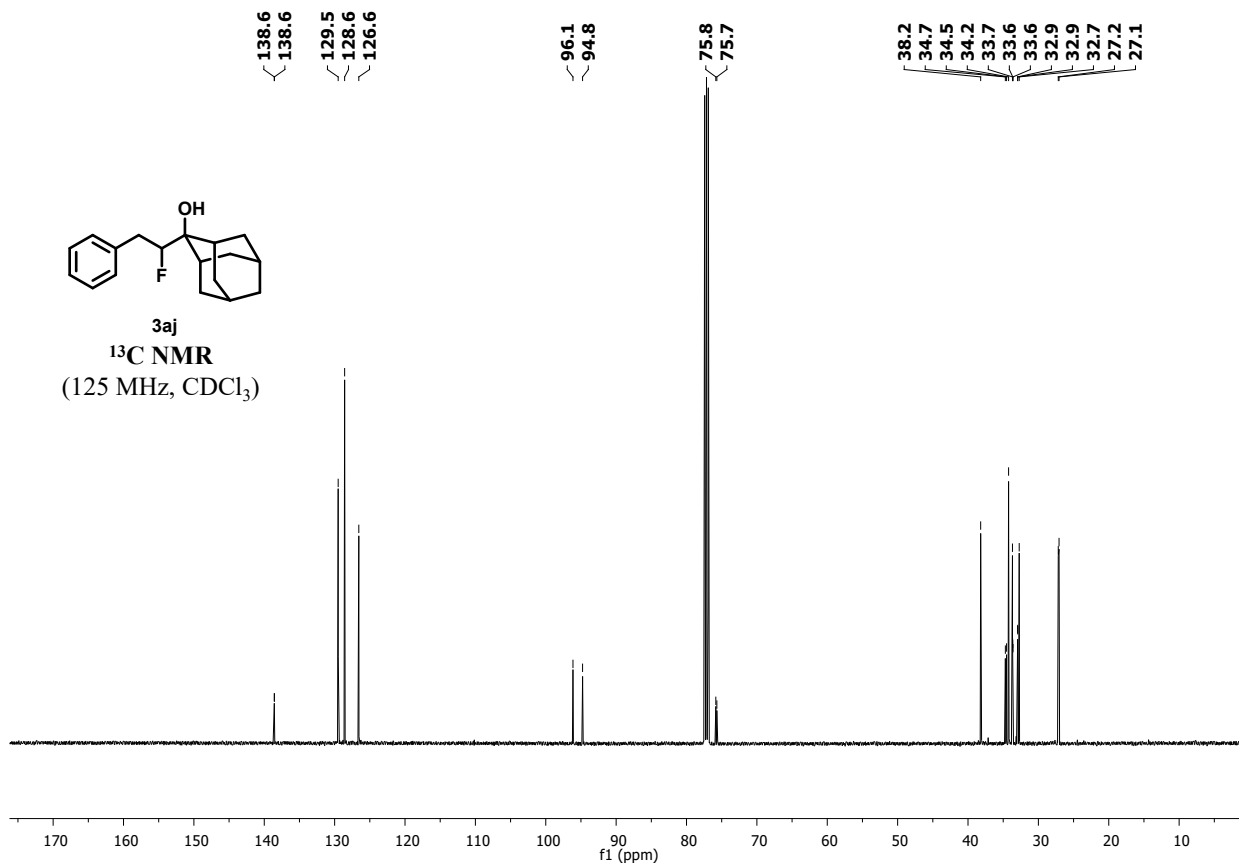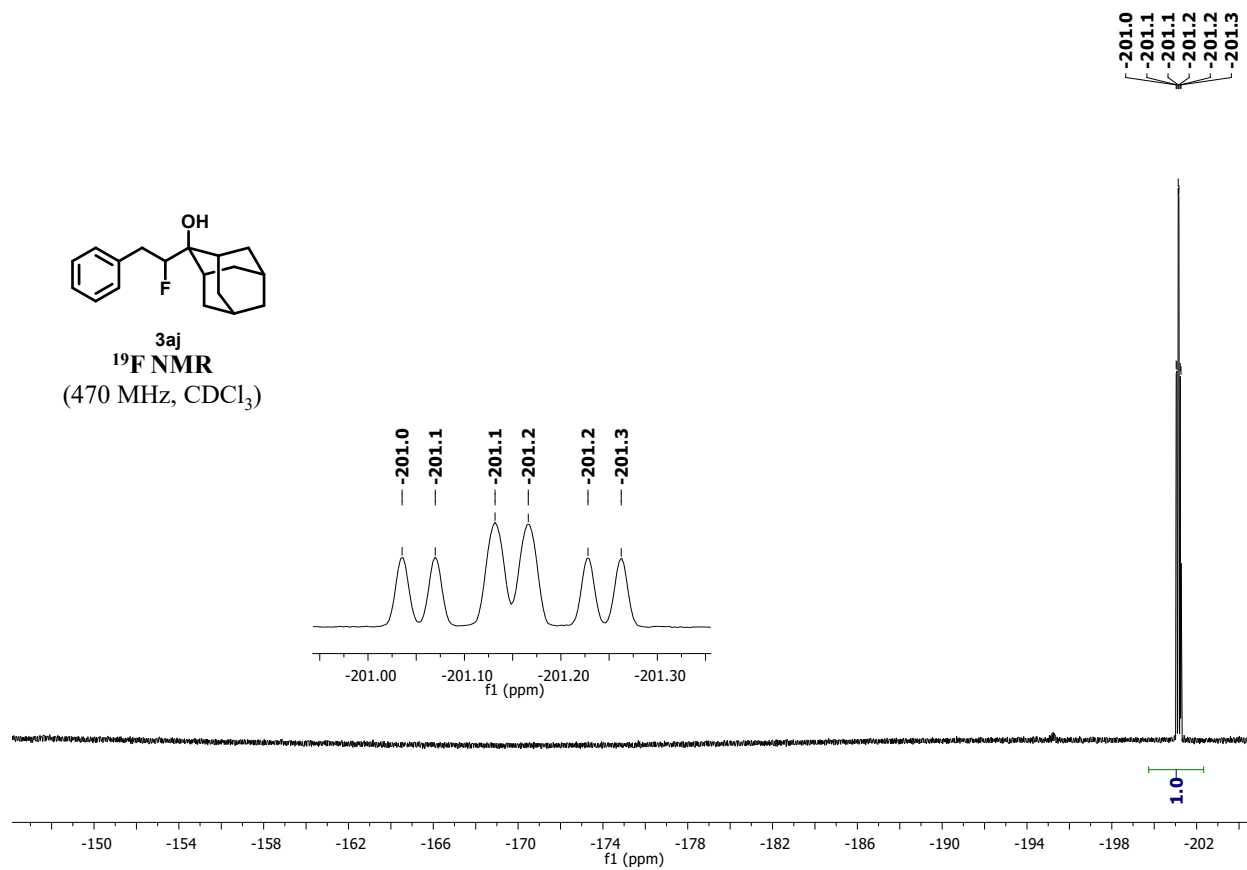

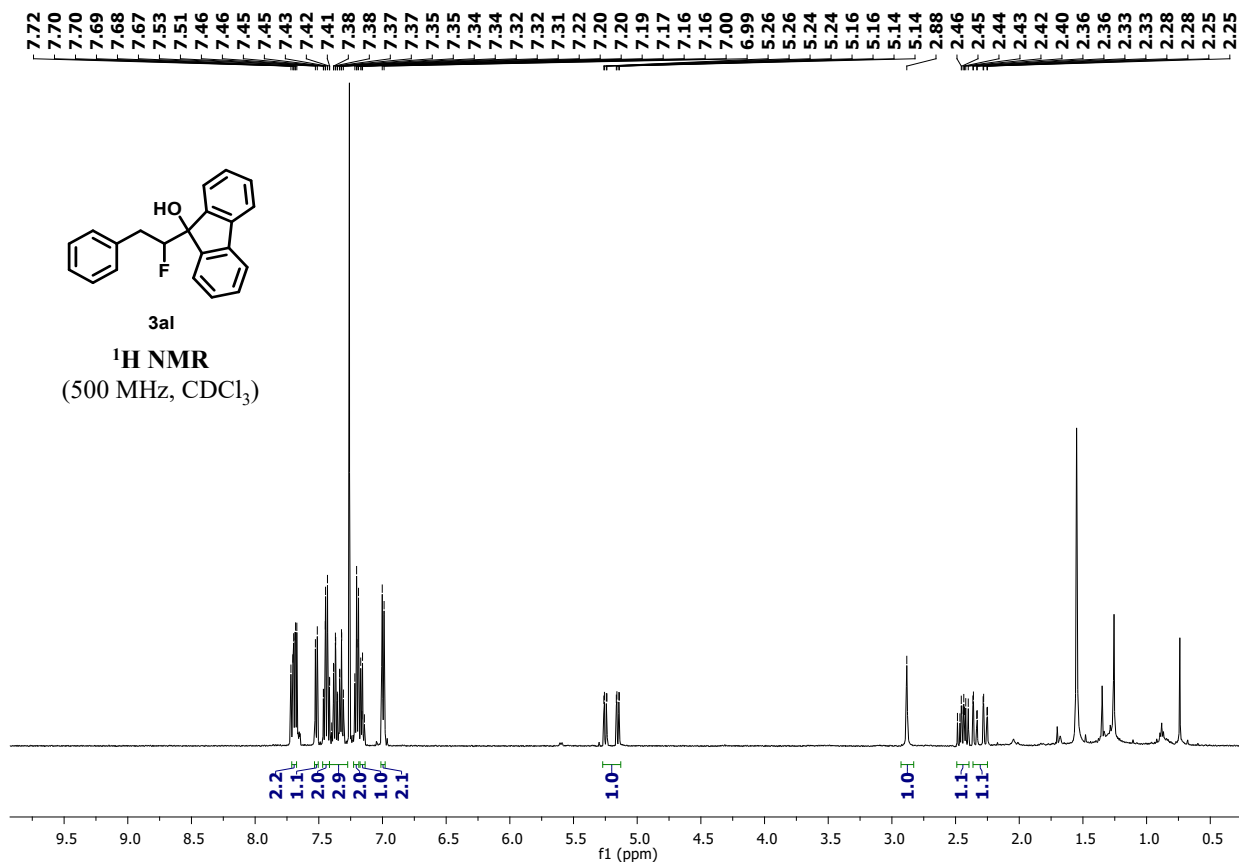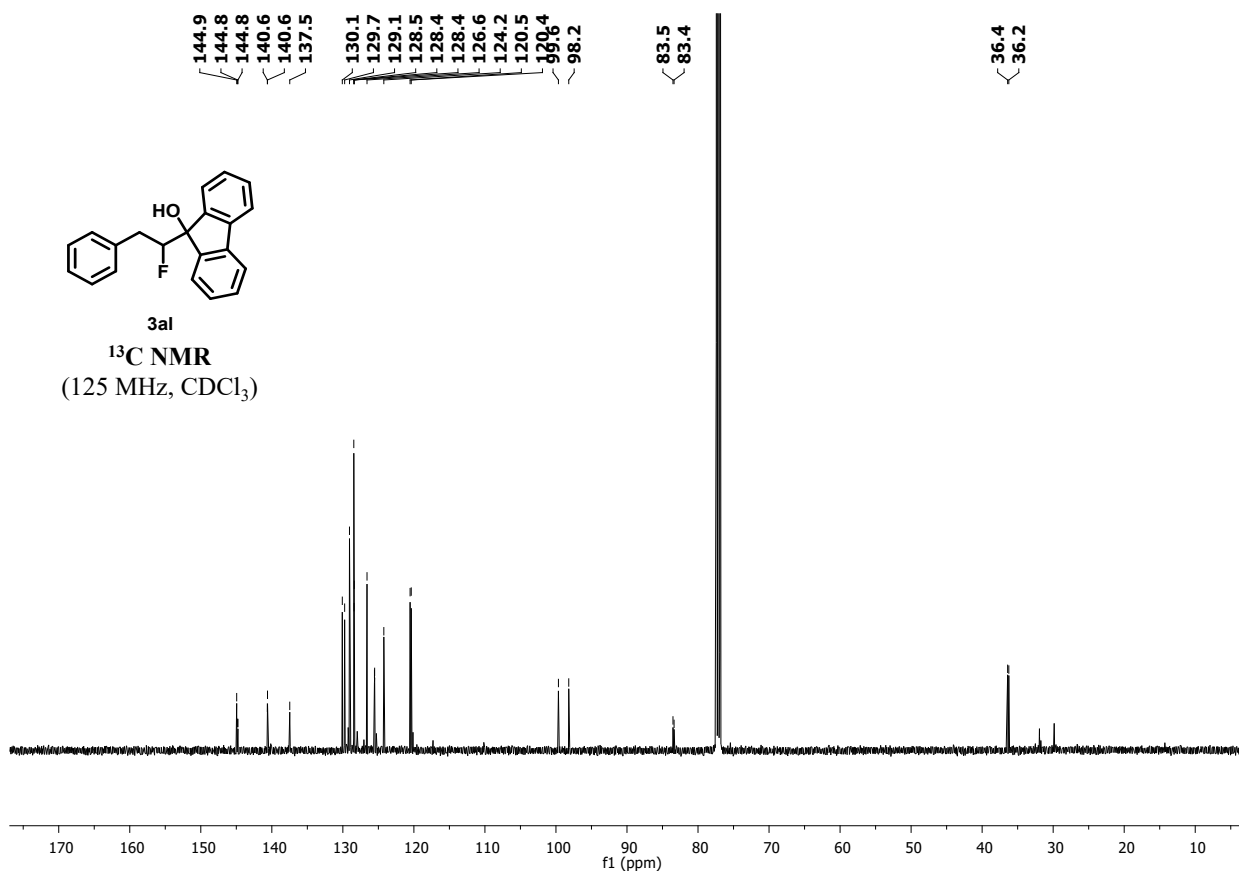

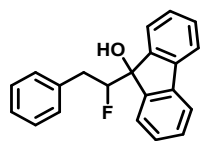

3al

<sup>19</sup>F NMR  
(470 MHz, CDCl<sub>3</sub>)

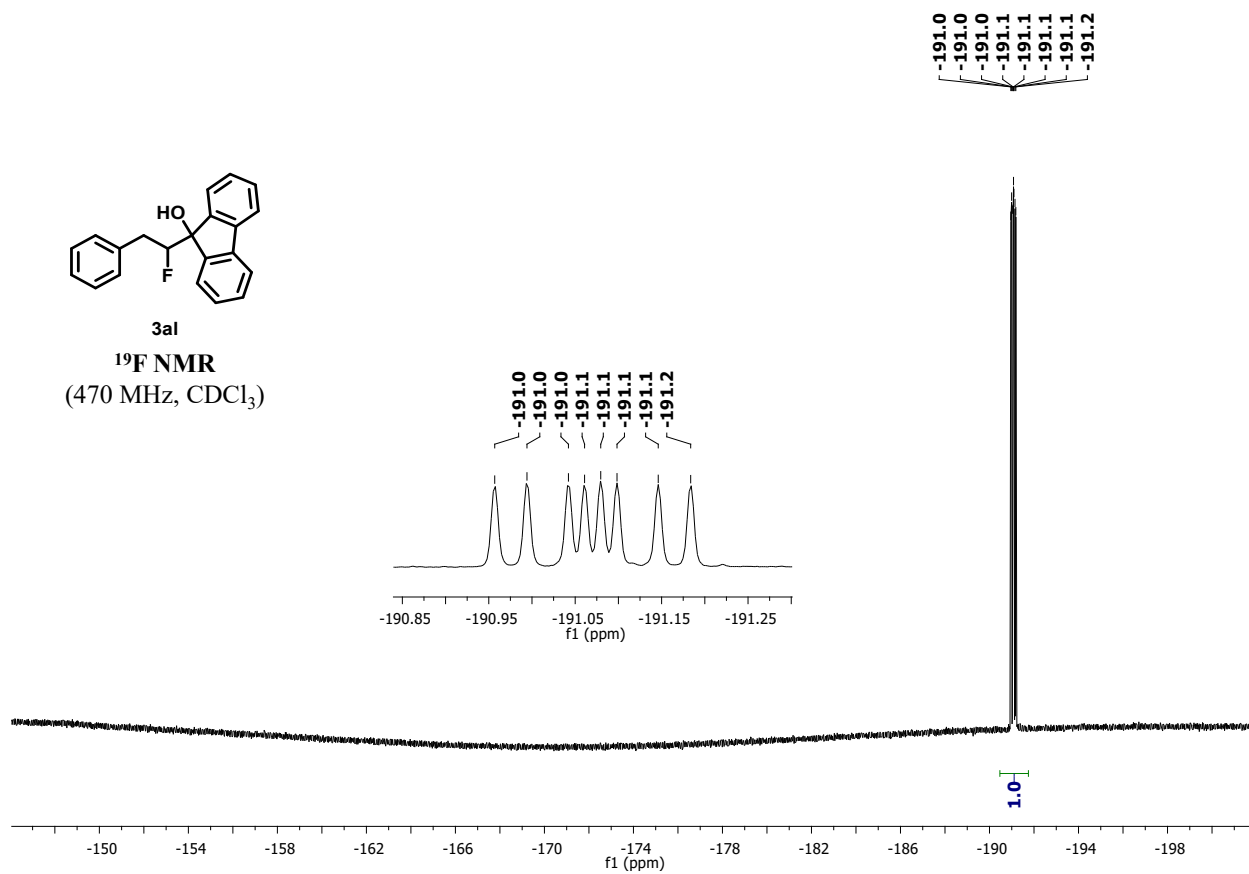

7.28  
7.28  
7.27  
7.26  
7.23  
7.22  
7.21  
7.20  
7.17  
7.16  
7.04  
7.03  
7.03  
7.02  
7.02  
7.01  
7.01  
4.77  
4.76  
4.75  
4.74  
4.67  
4.67  
4.65  
2.99  
2.96  
2.94  
2.93  
2.91  
2.85  
2.82  
2.77  
2.74  
2.42  
2.42  
1.75  
1.75

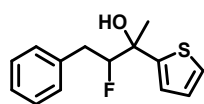

3am-A

<sup>1</sup>H NMR  
(500 MHz, CDCl<sub>3</sub>)

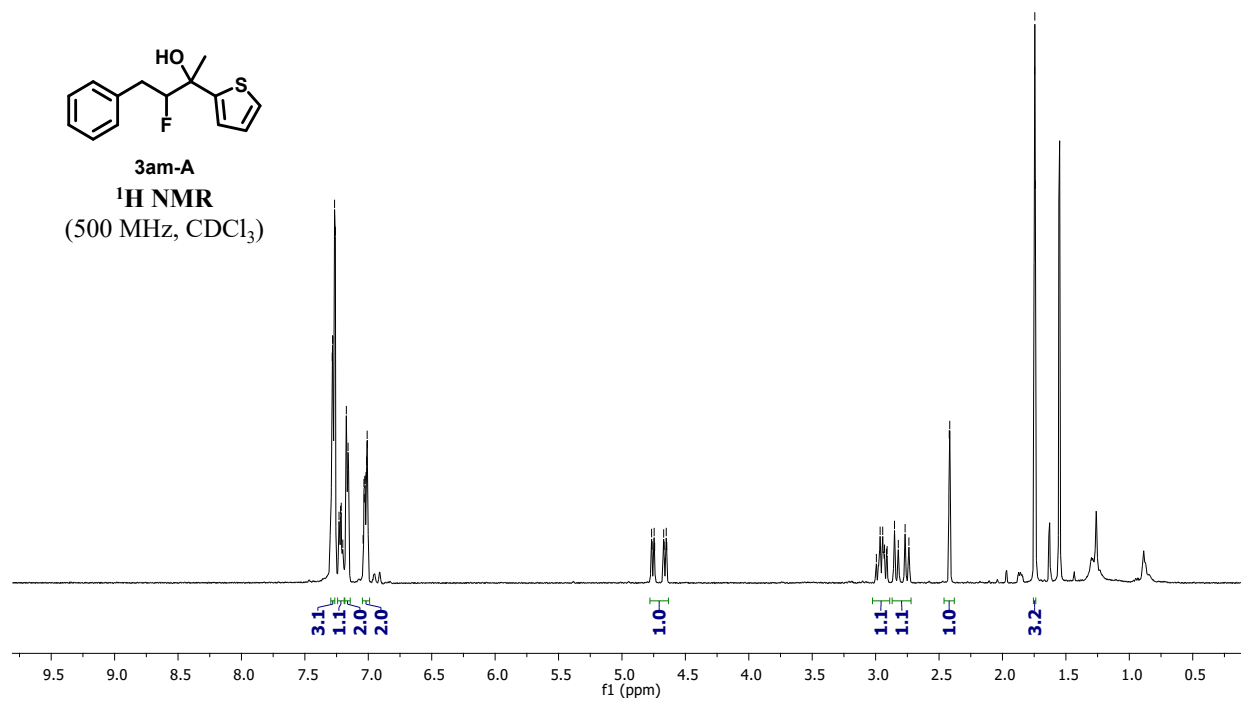

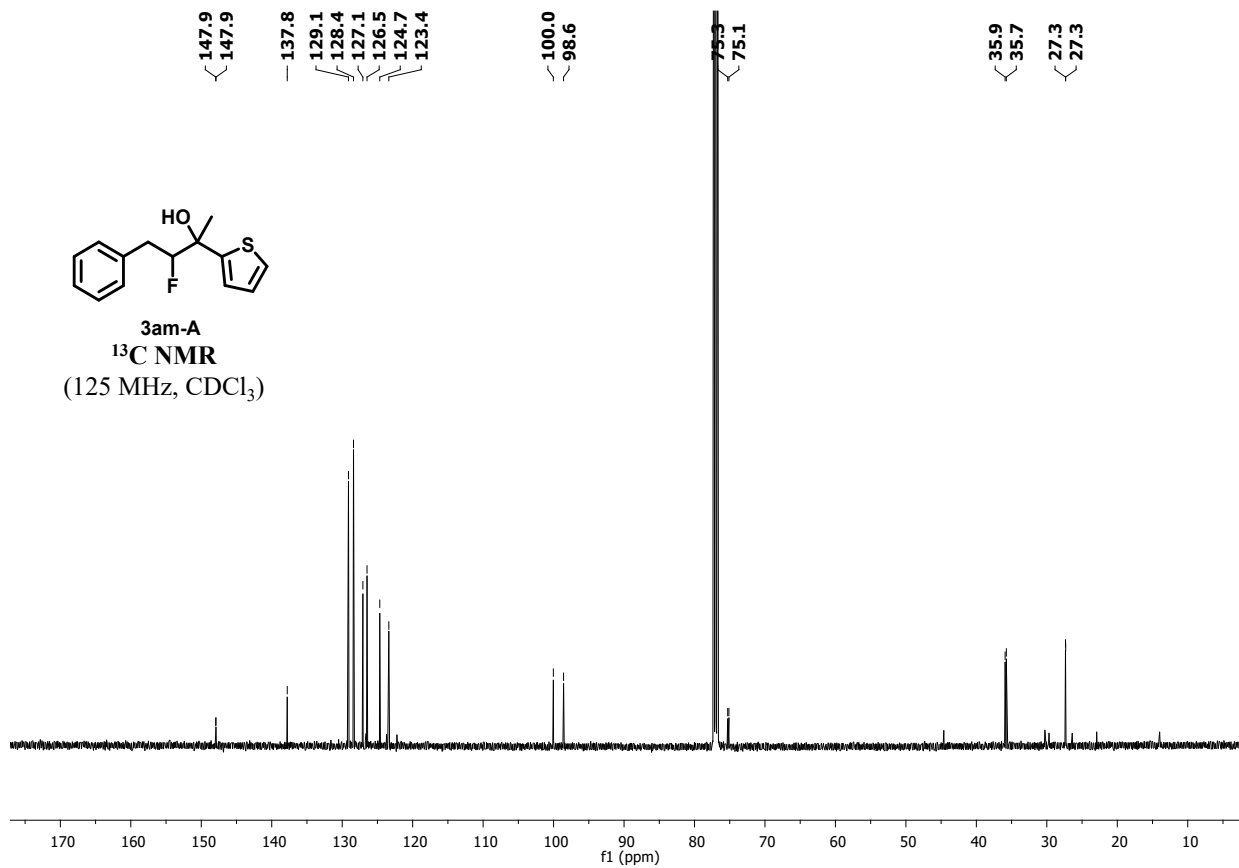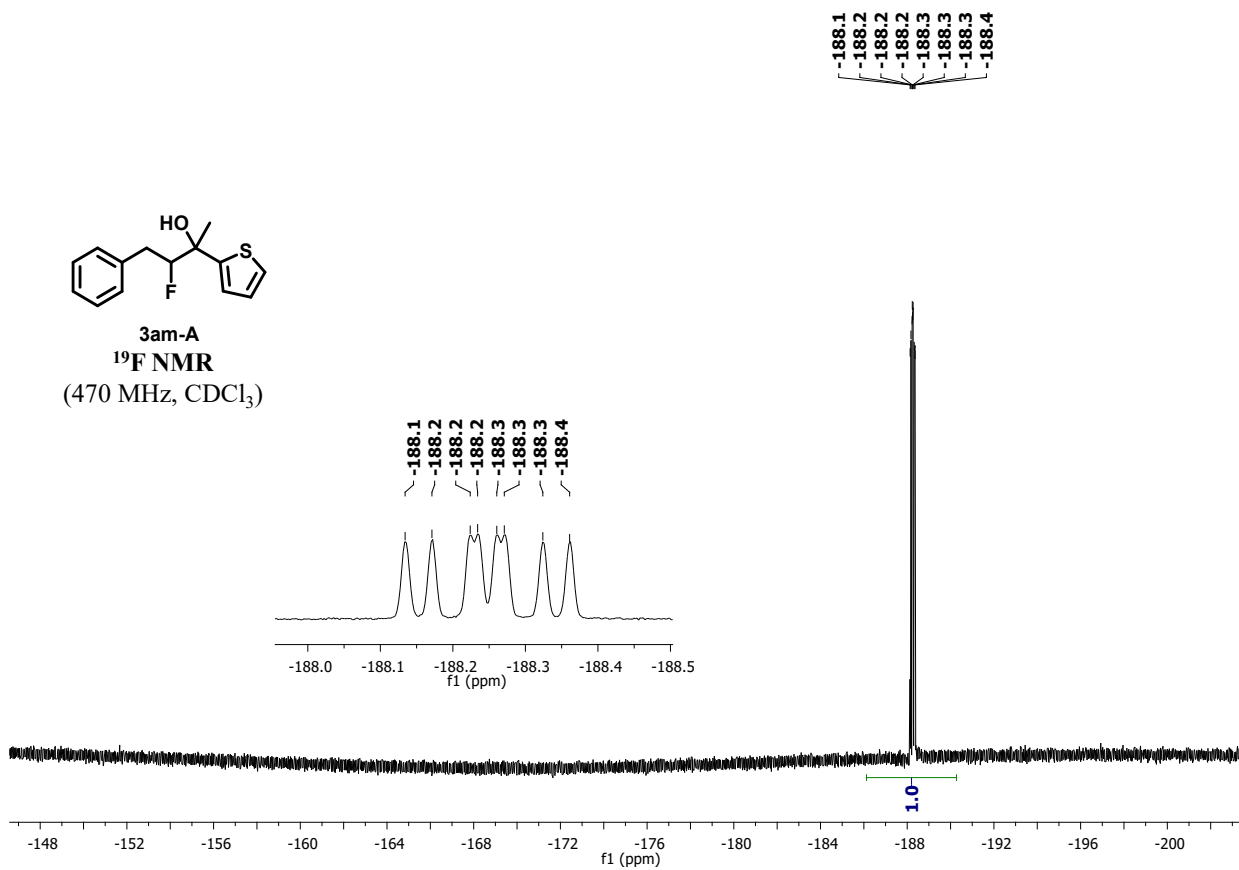

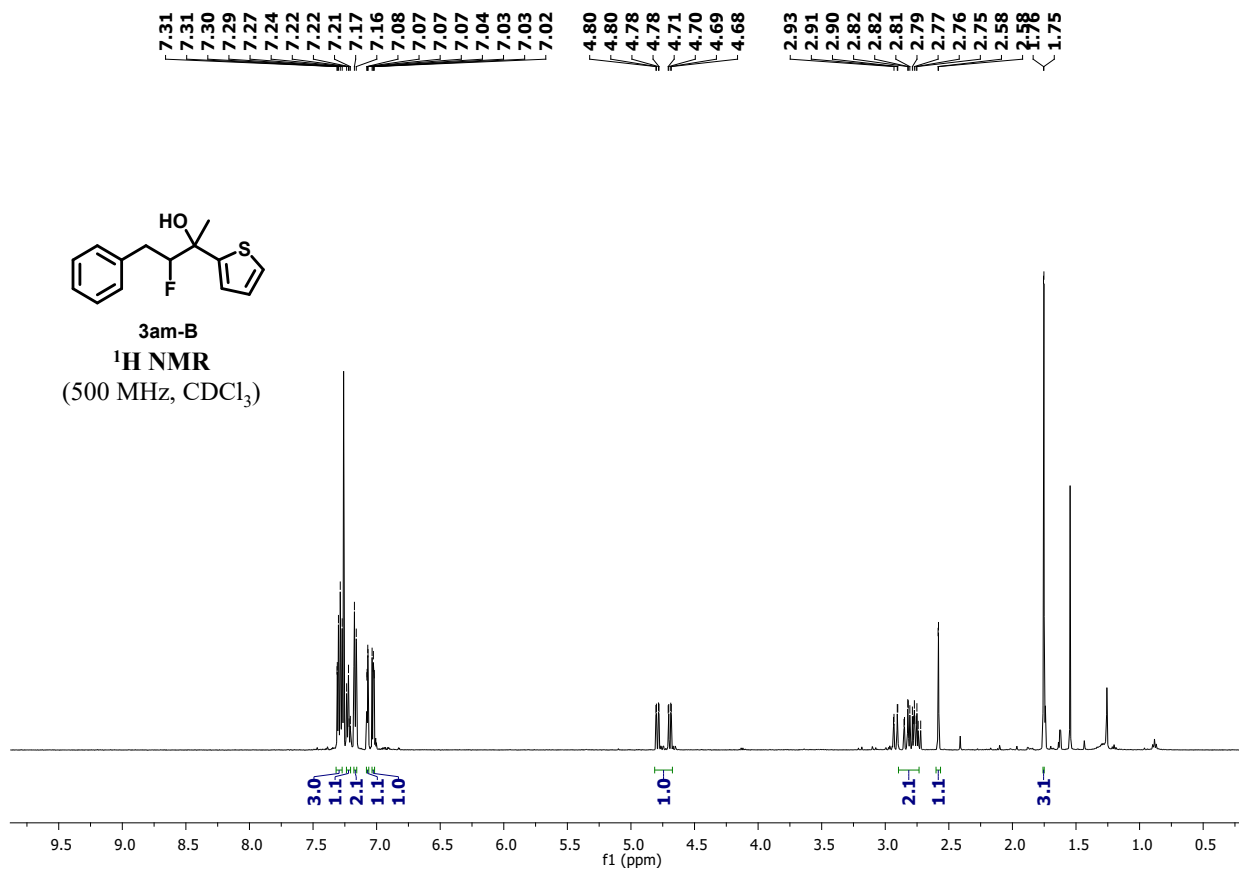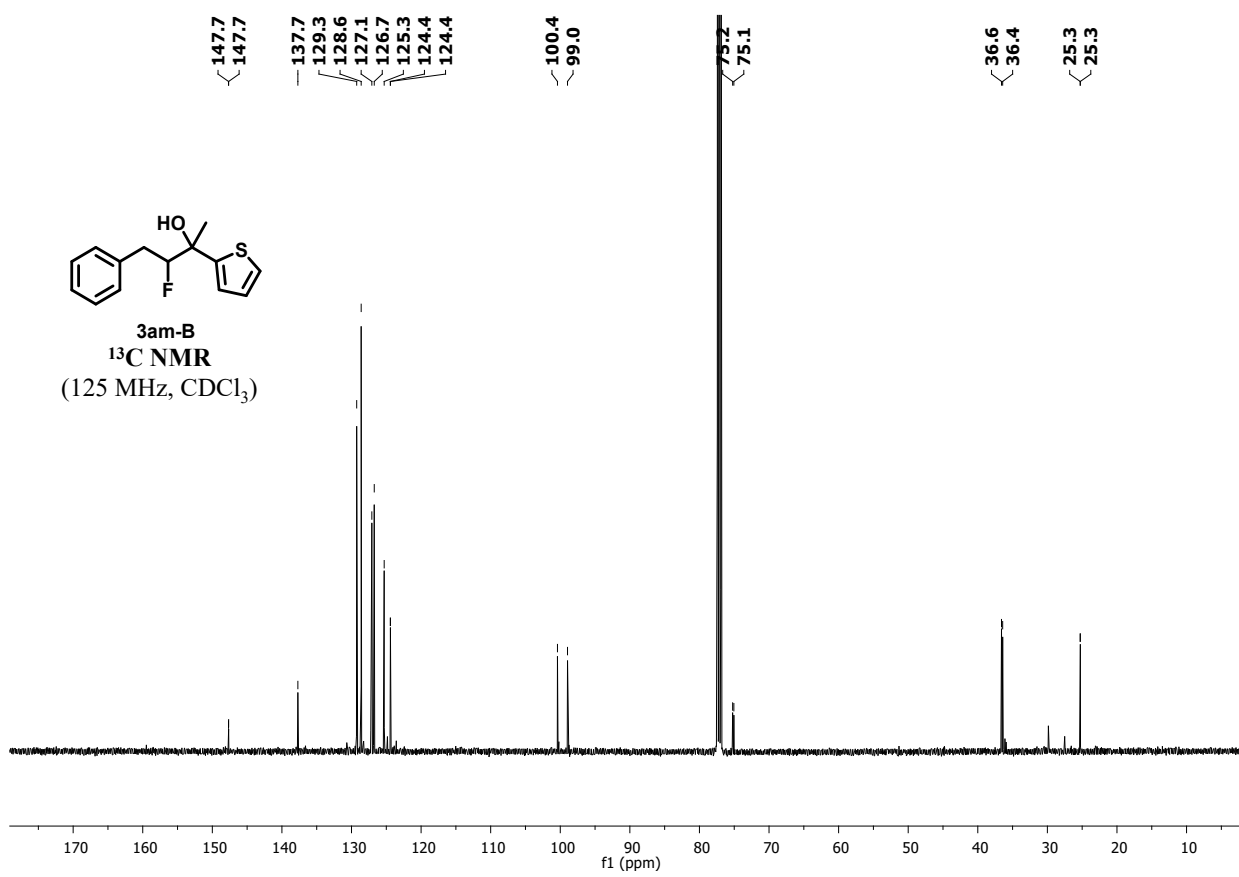

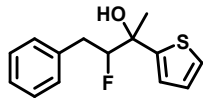

**3am-B**  
<sup>19</sup>F NMR  
 (470 MHz, CDCl<sub>3</sub>)

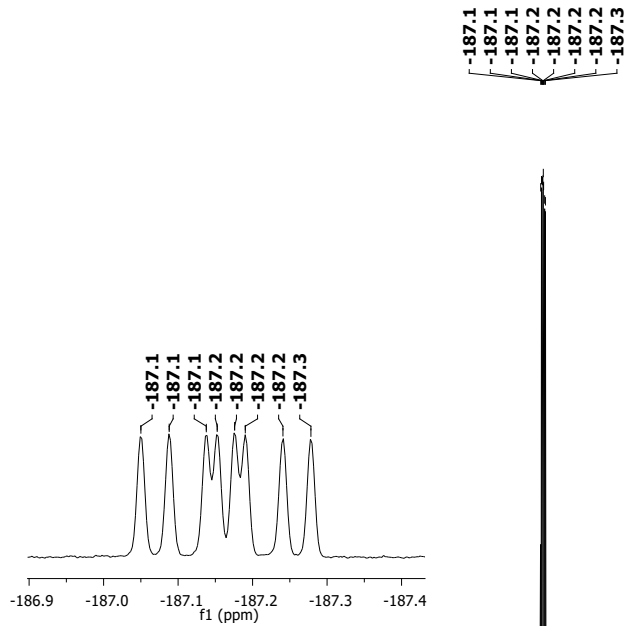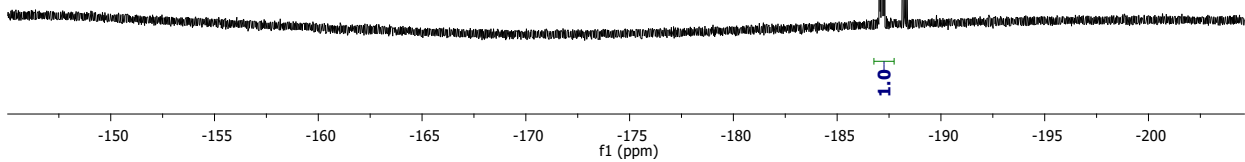

7.33, 7.32, 7.32, 7.31, 7.30, 7.26, 7.23, 7.23, 4.61, 4.60, 4.60, 4.59, 4.59, 4.58, 4.51, 4.51, 4.50, 4.50, 4.49, 4.49, 3.59, 3.55, 3.06, 3.05, 3.04, 3.02, 3.01, 2.99, 2.98, 1.78, 1.76, 1.59, 1.58, 1.56, 1.55, 1.54, 1.54, 1.49, 1.48, 1.48, 1.46, 1.45, 1.37, 1.36, 1.35, 1.34, 1.33, 1.32, 1.32, 1.31, 1.29, 1.28, 1.28, 1.26, 0.89, 0.88, 0.87

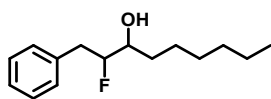

**3an-A**  
<sup>1</sup>H NMR  
 (500 MHz, CDCl<sub>3</sub>)

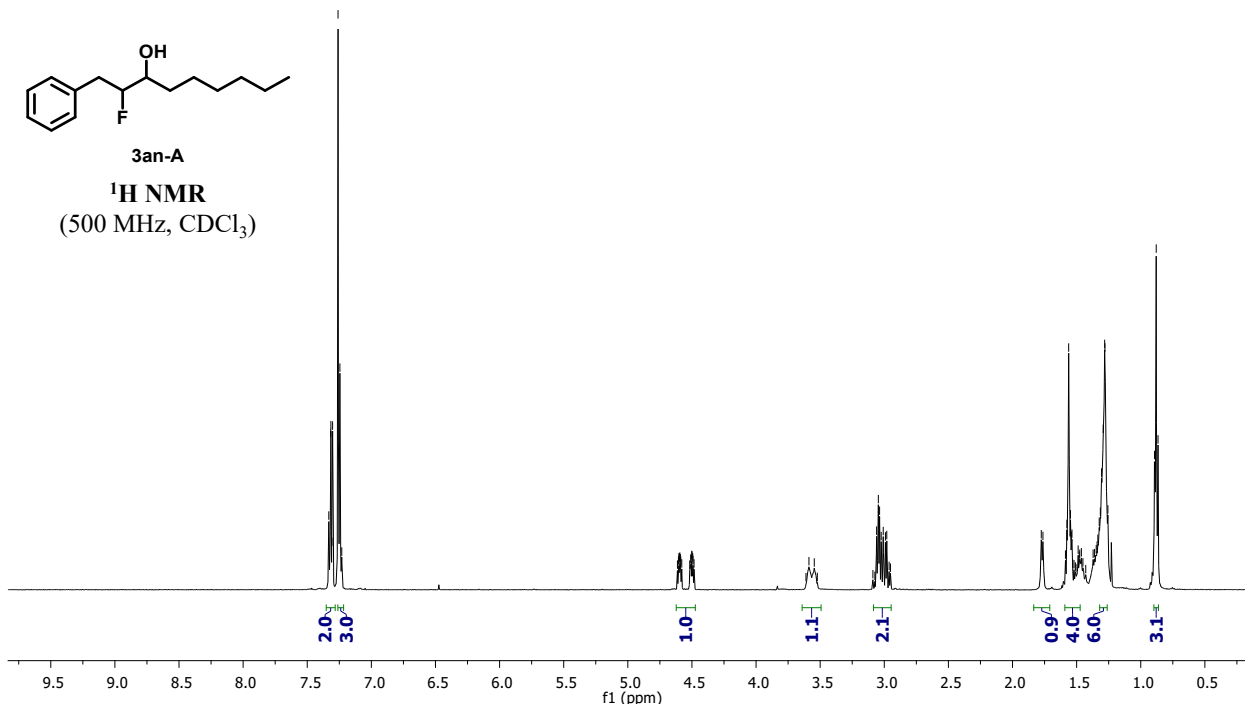

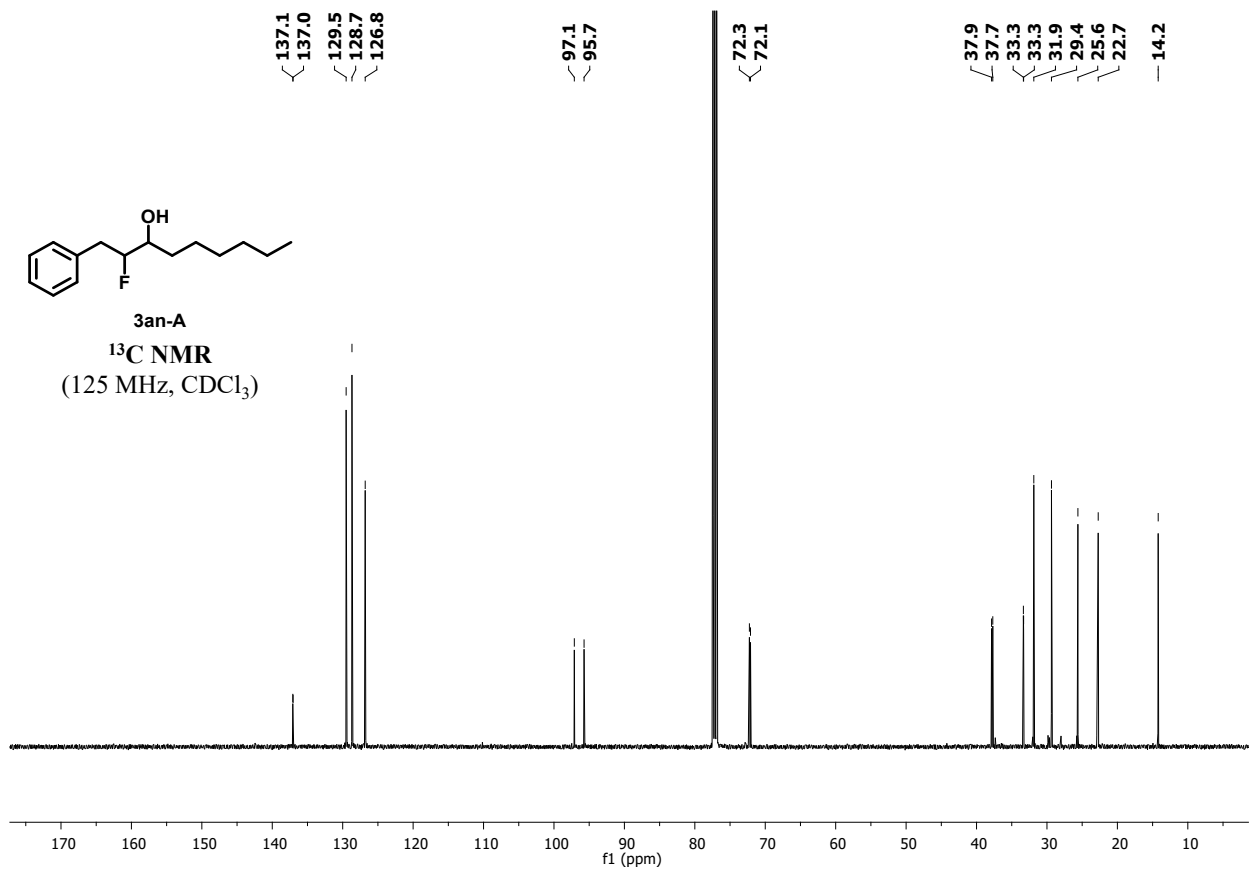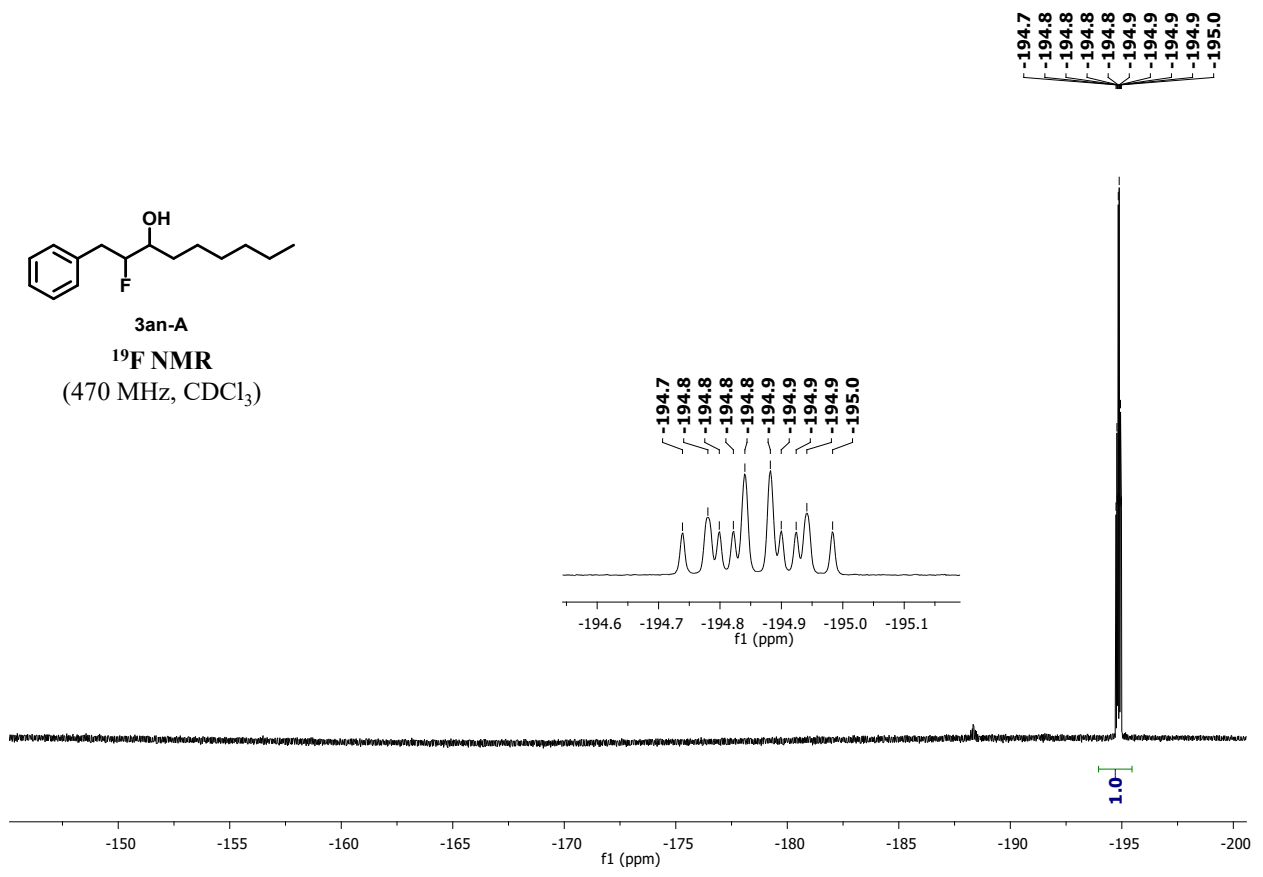

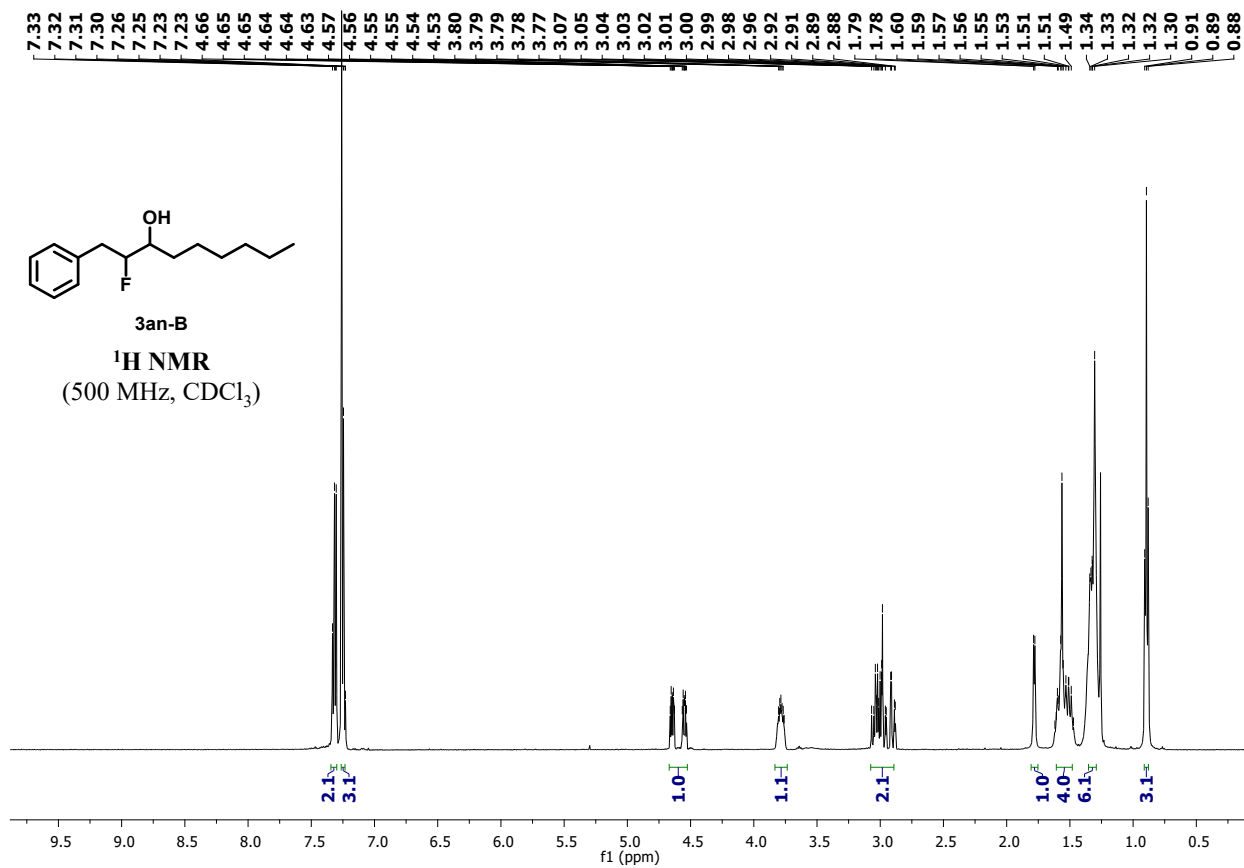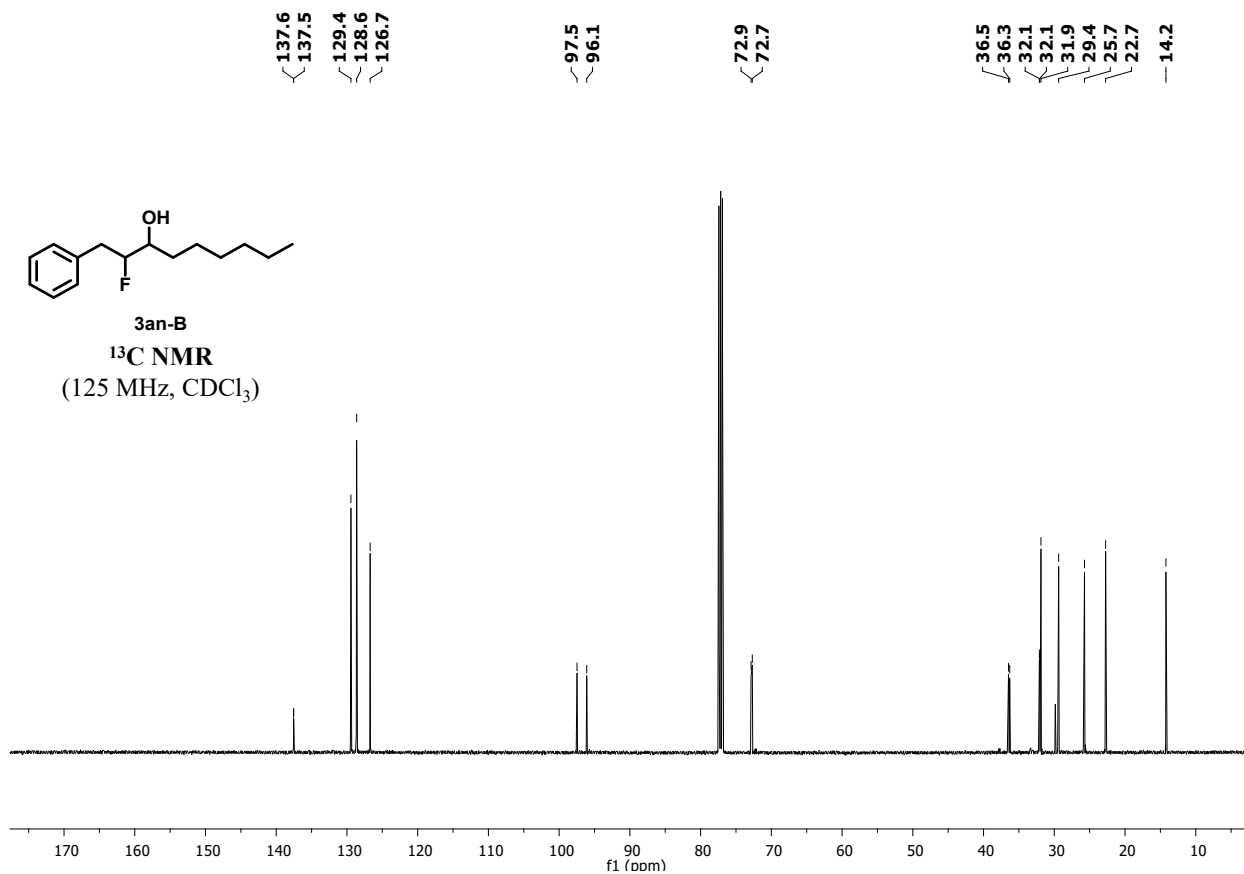



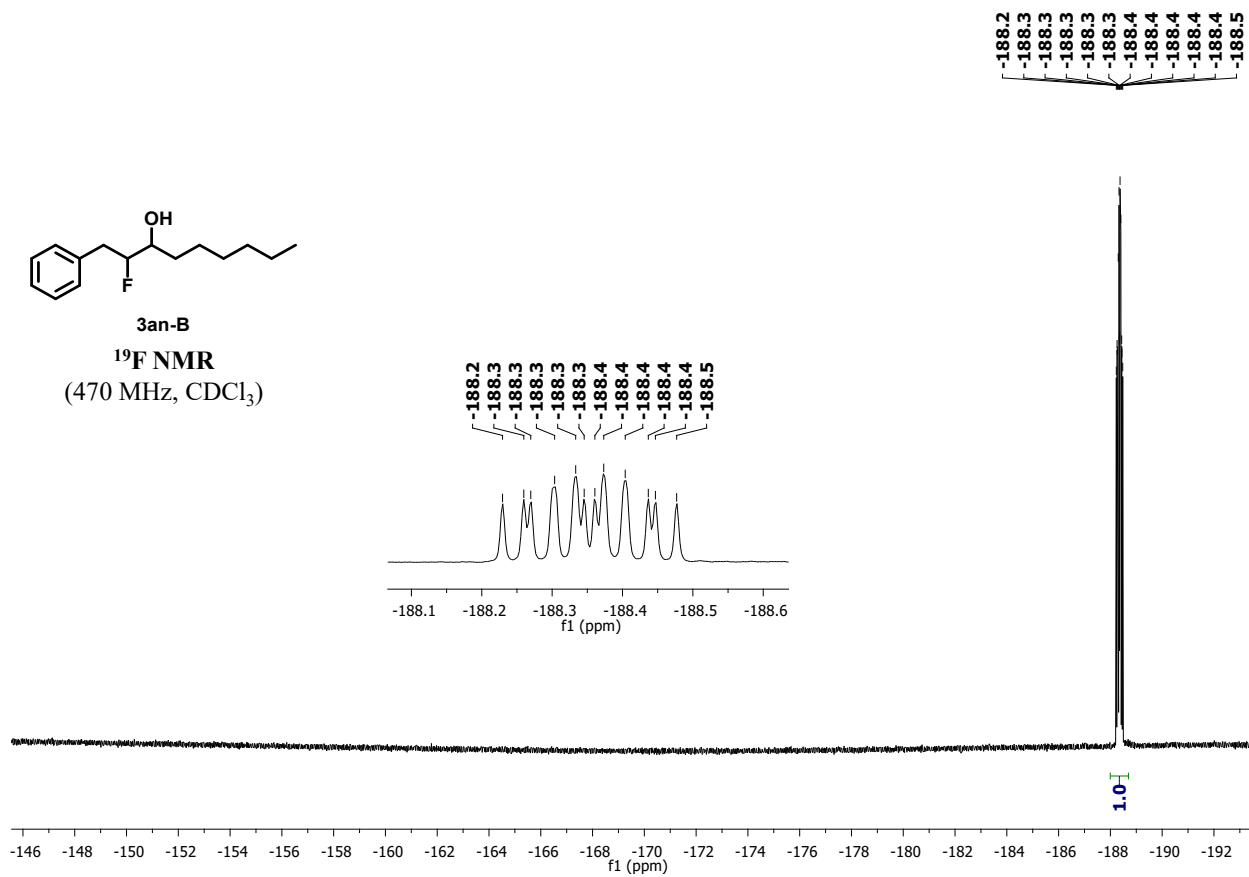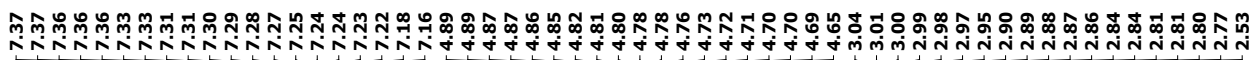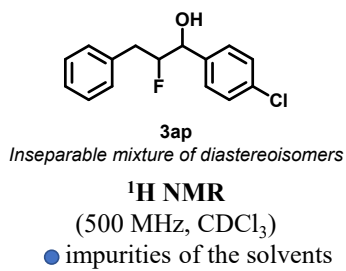

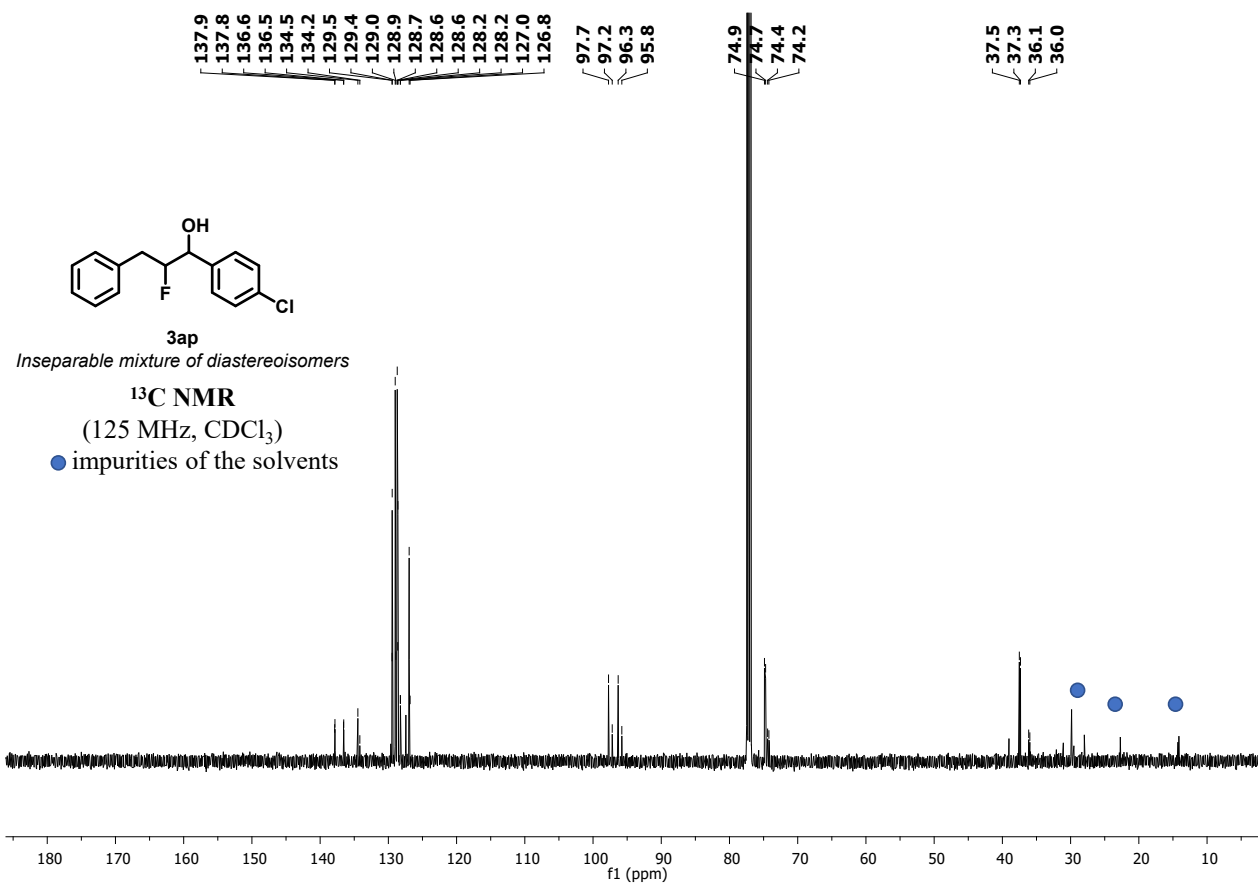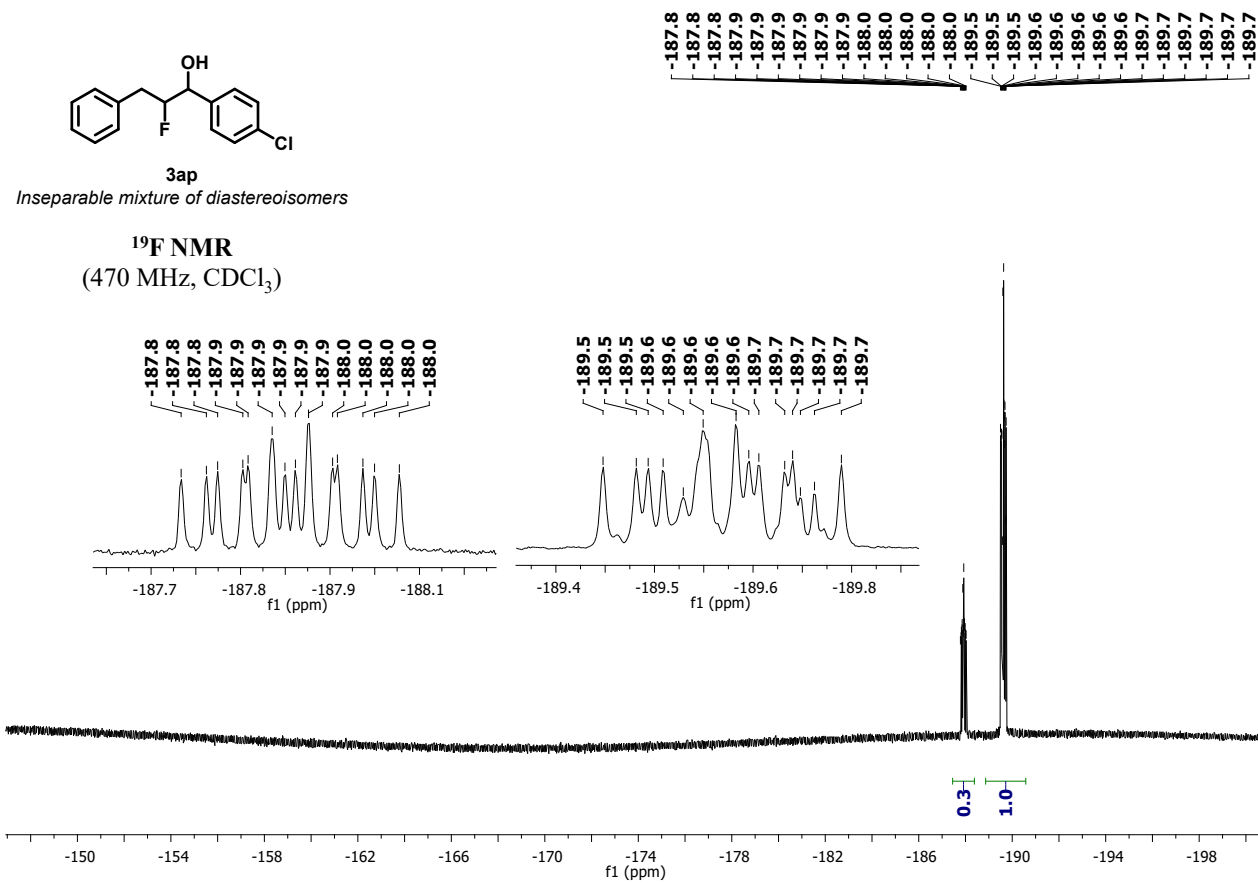

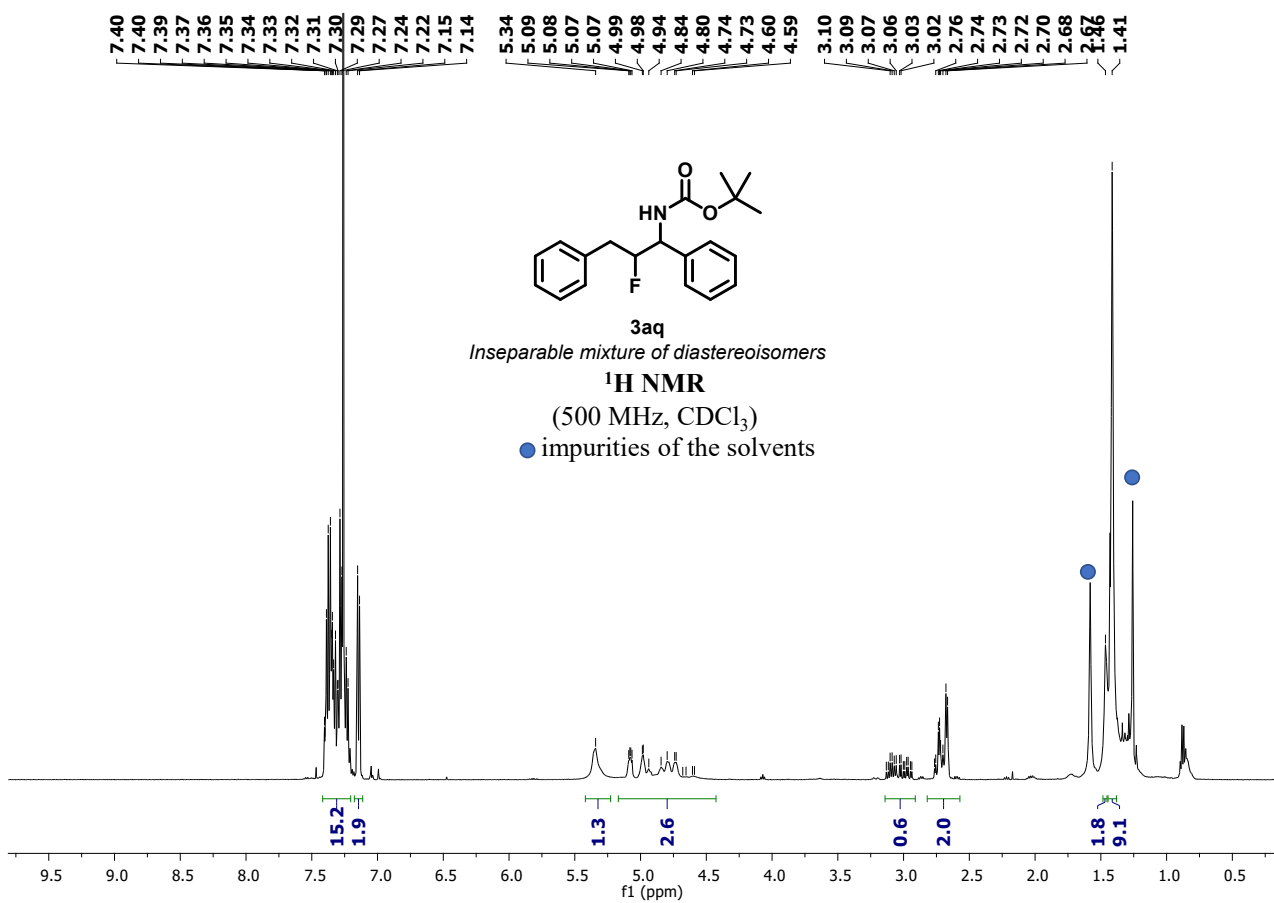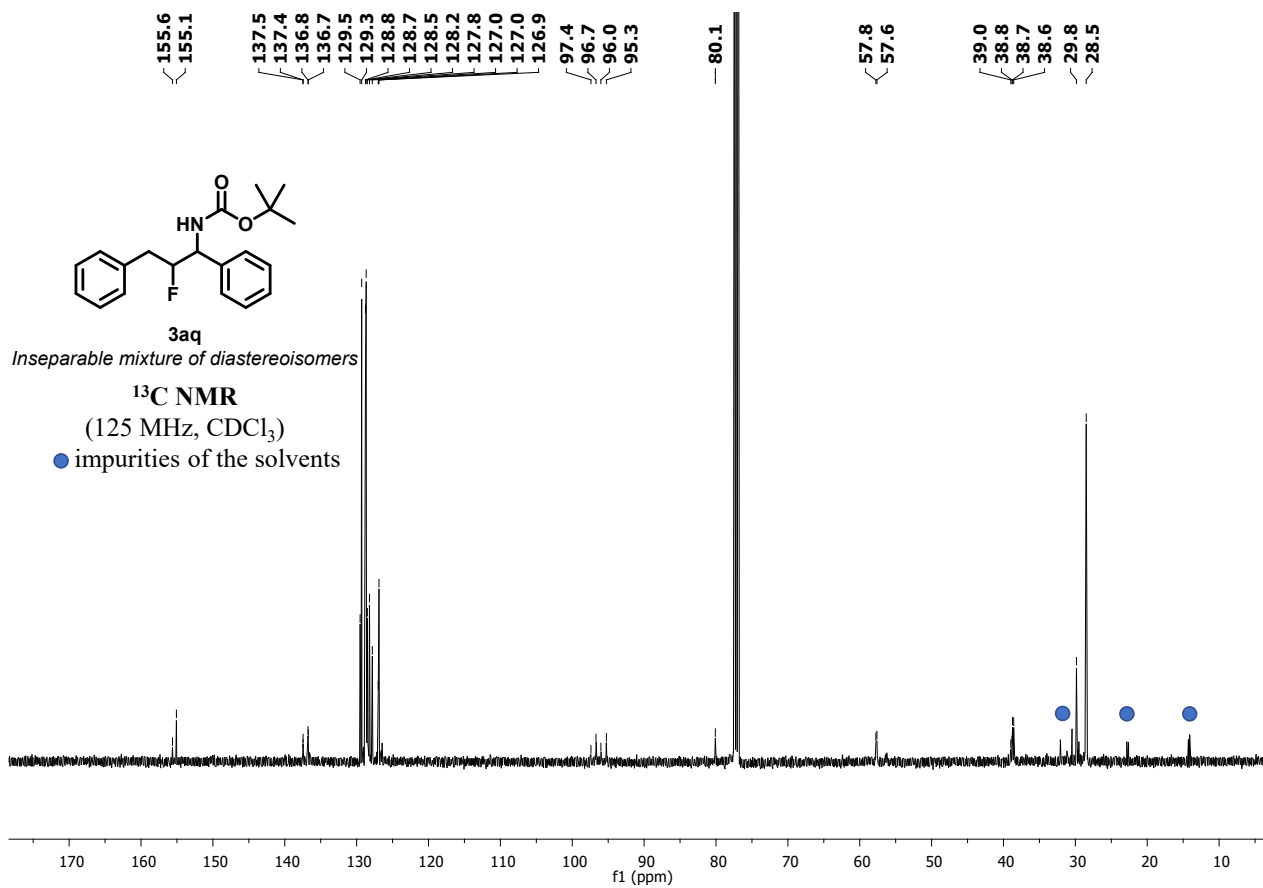



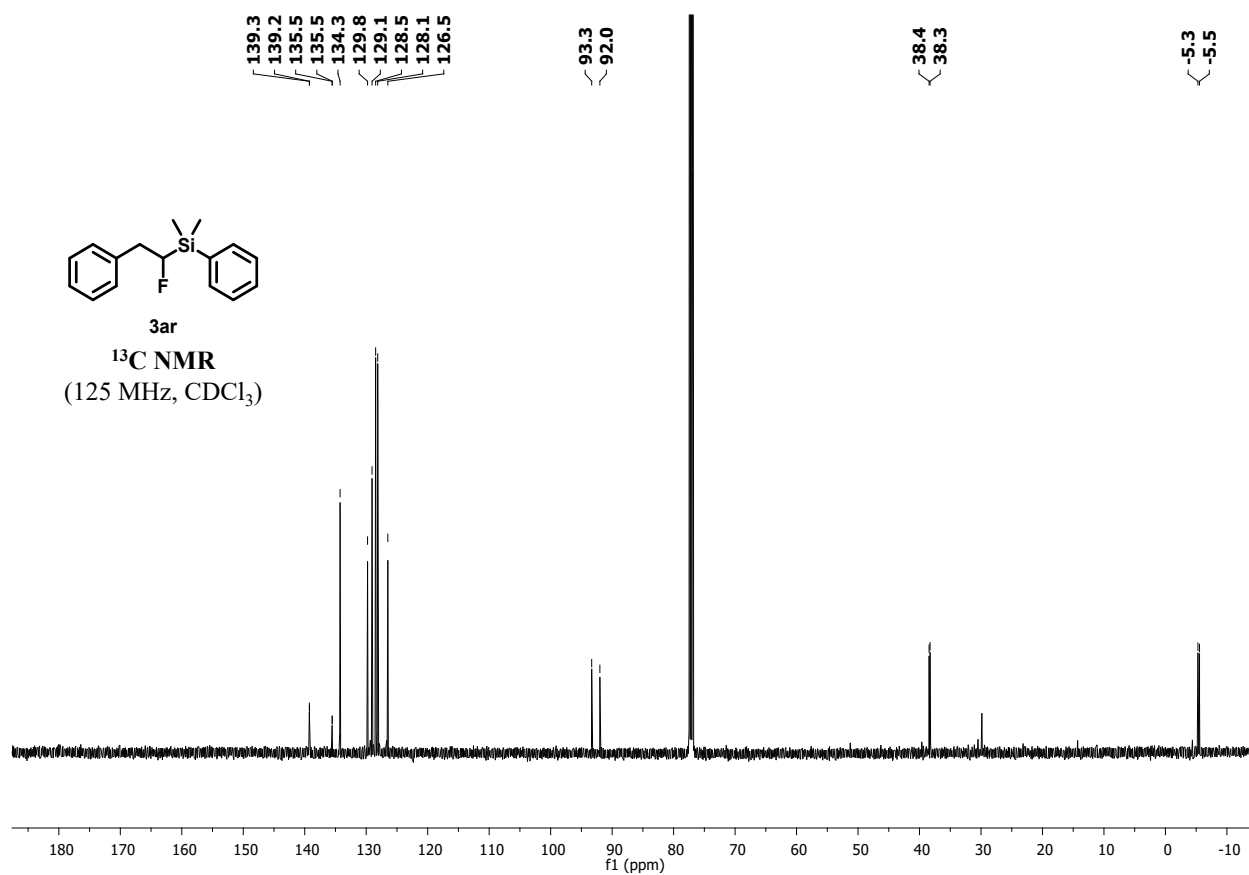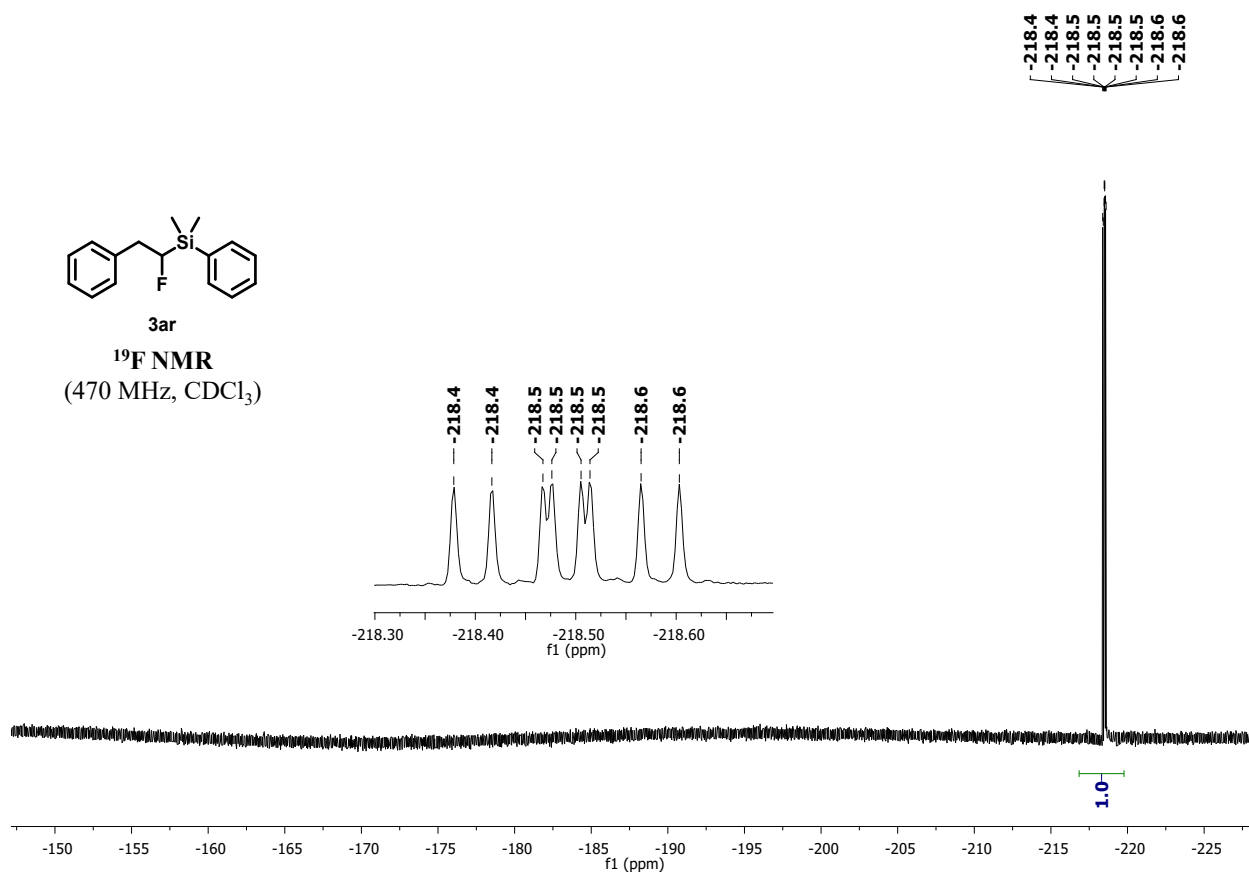

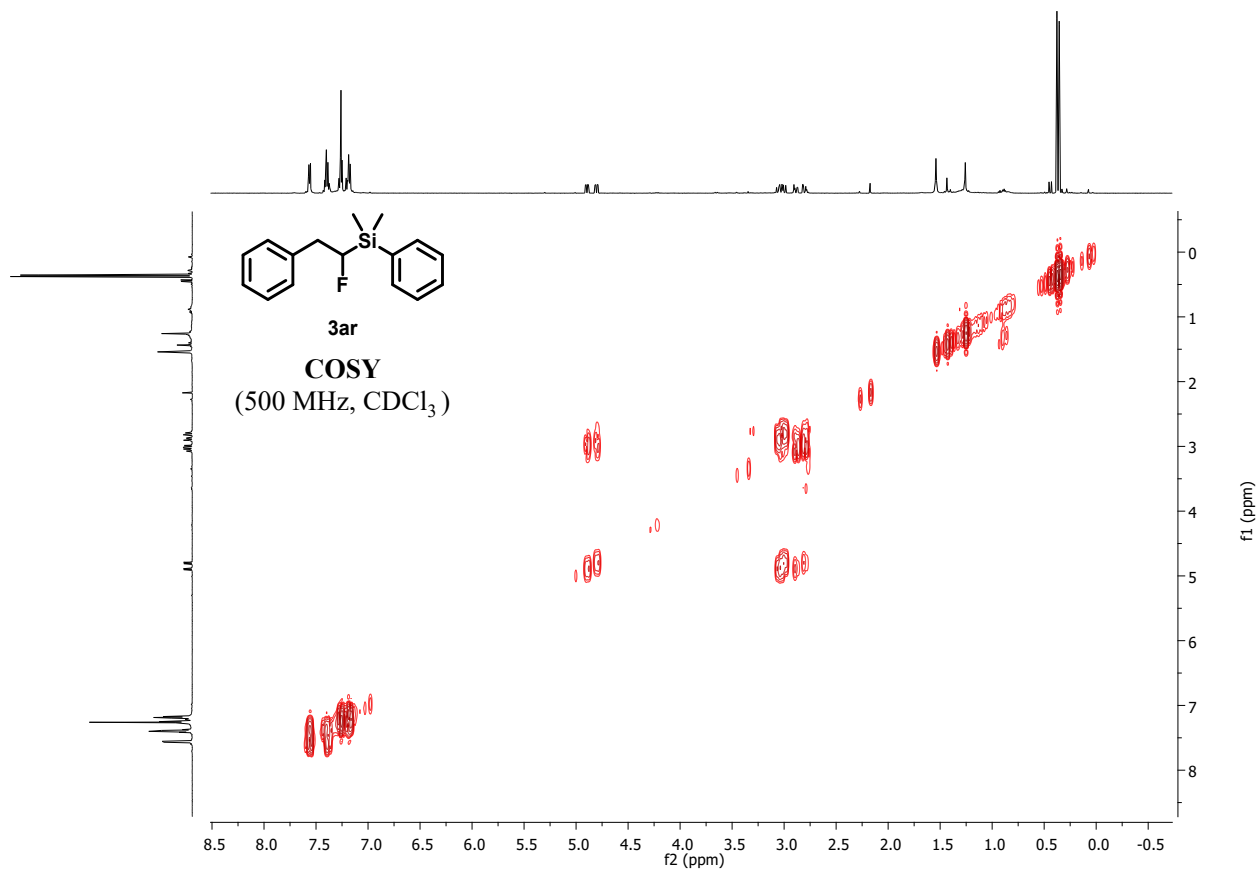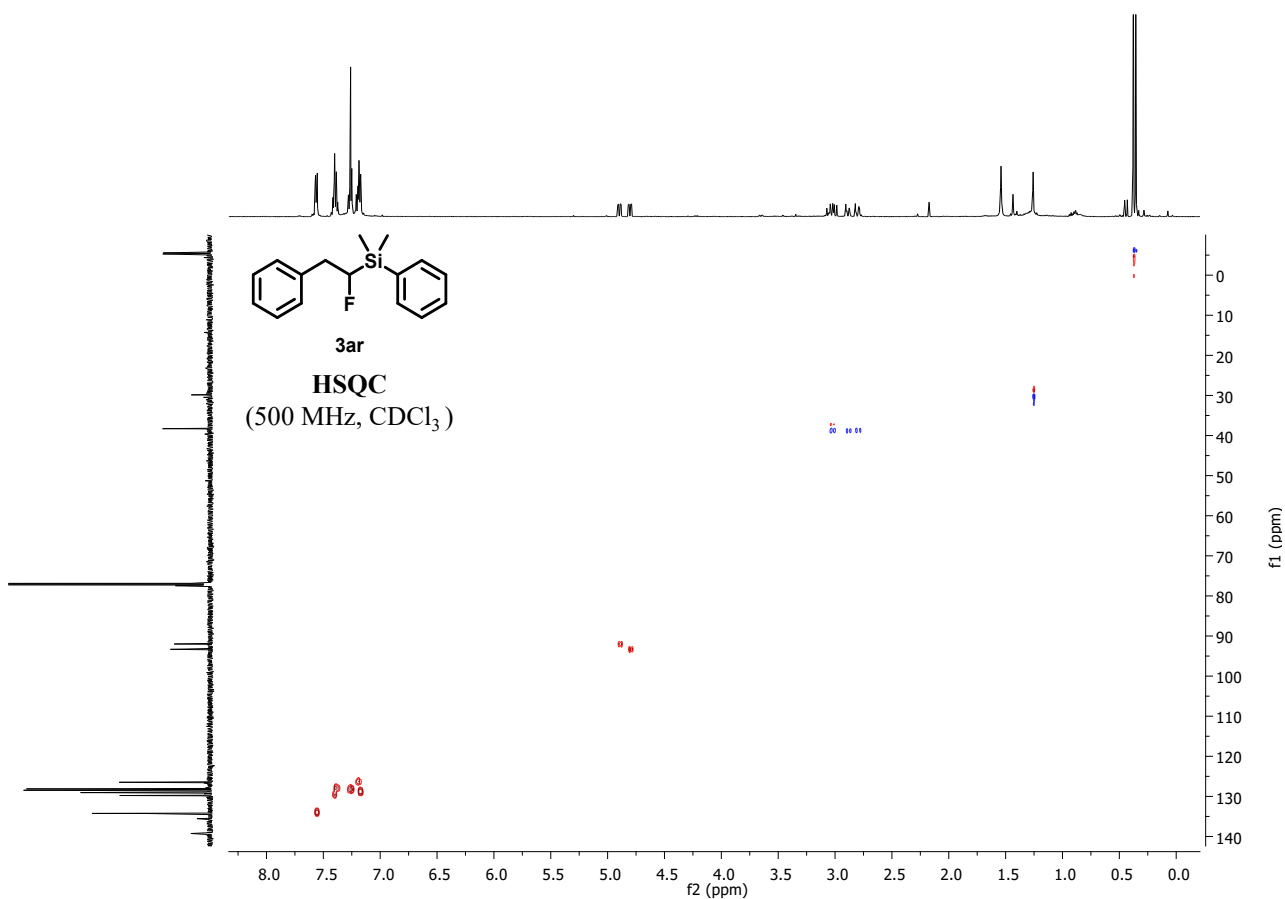

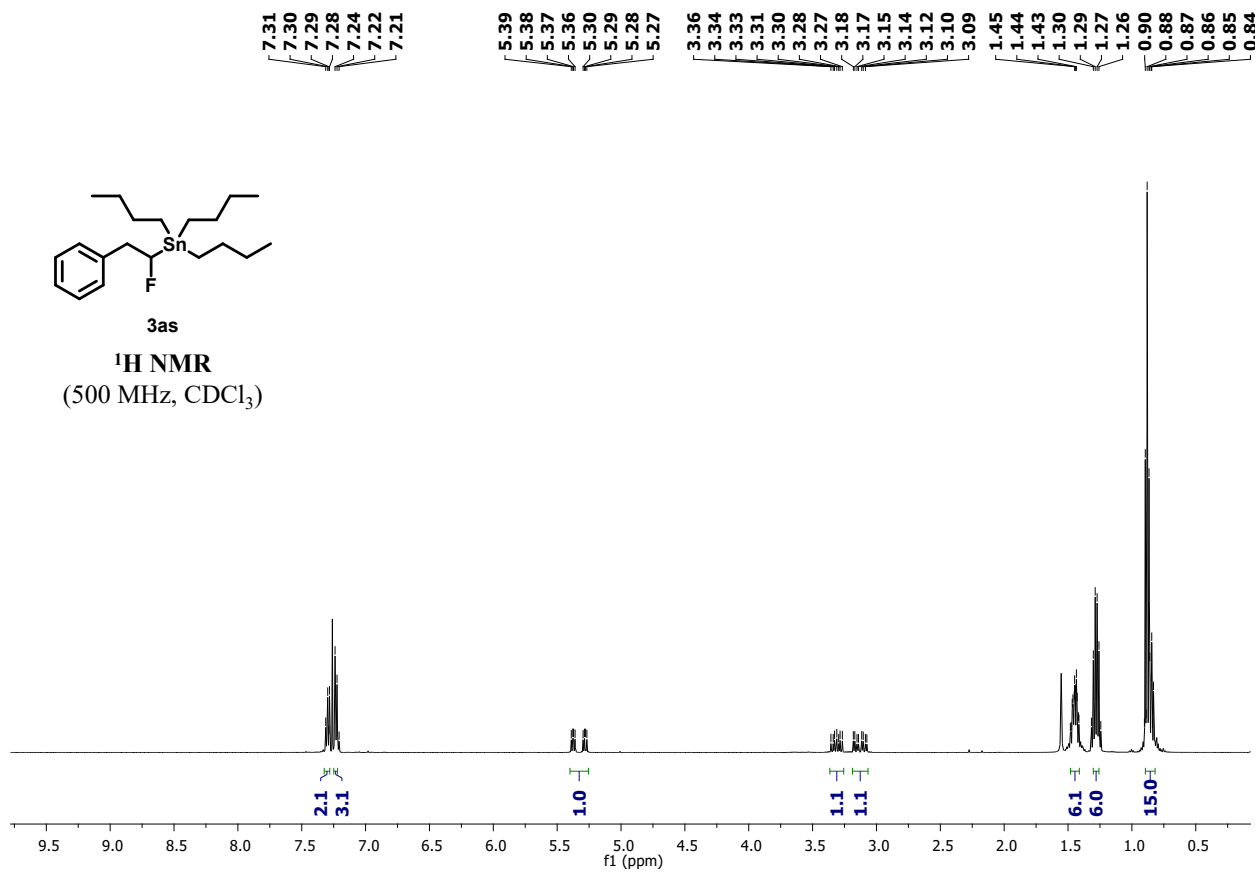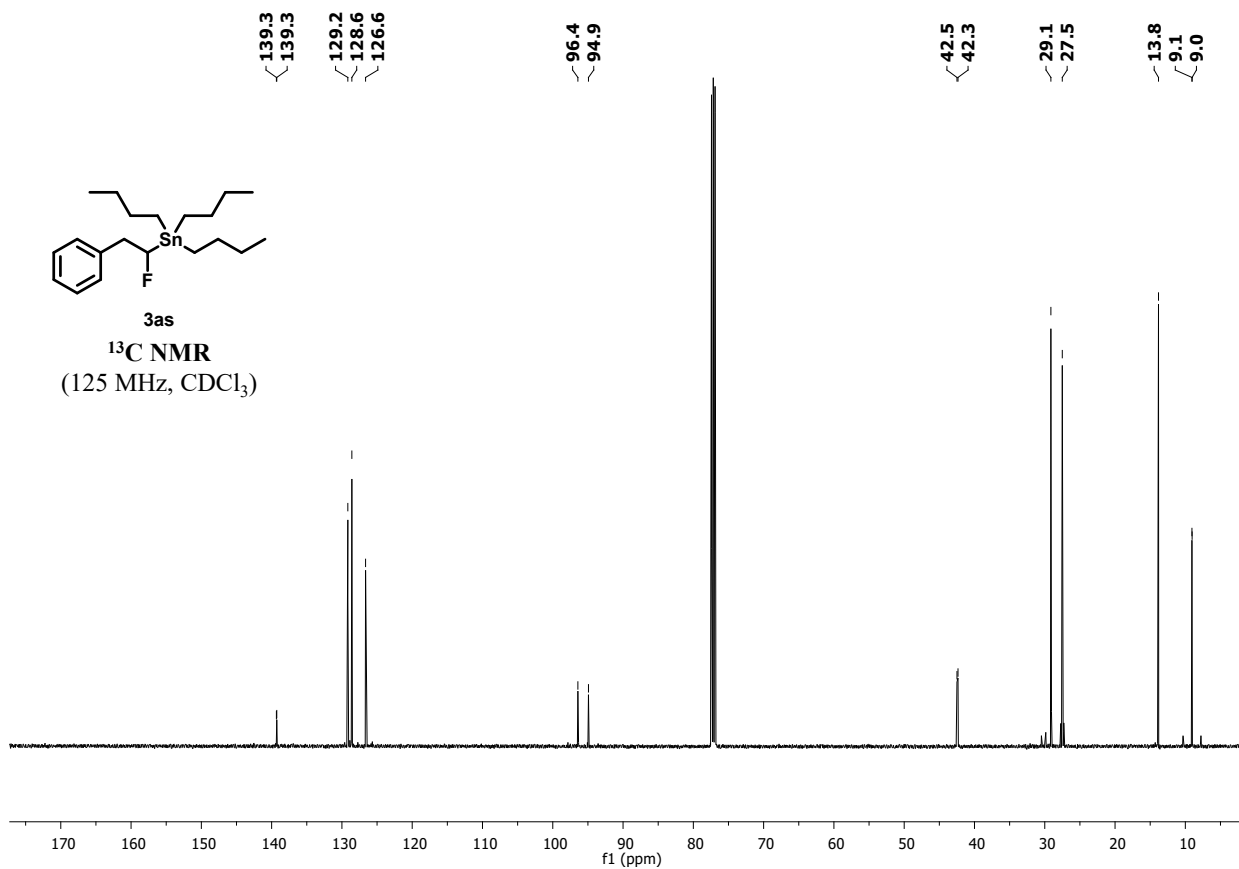

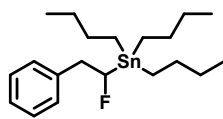

3as

<sup>19</sup>F NMR  
(470 MHz, CDCl<sub>3</sub>)

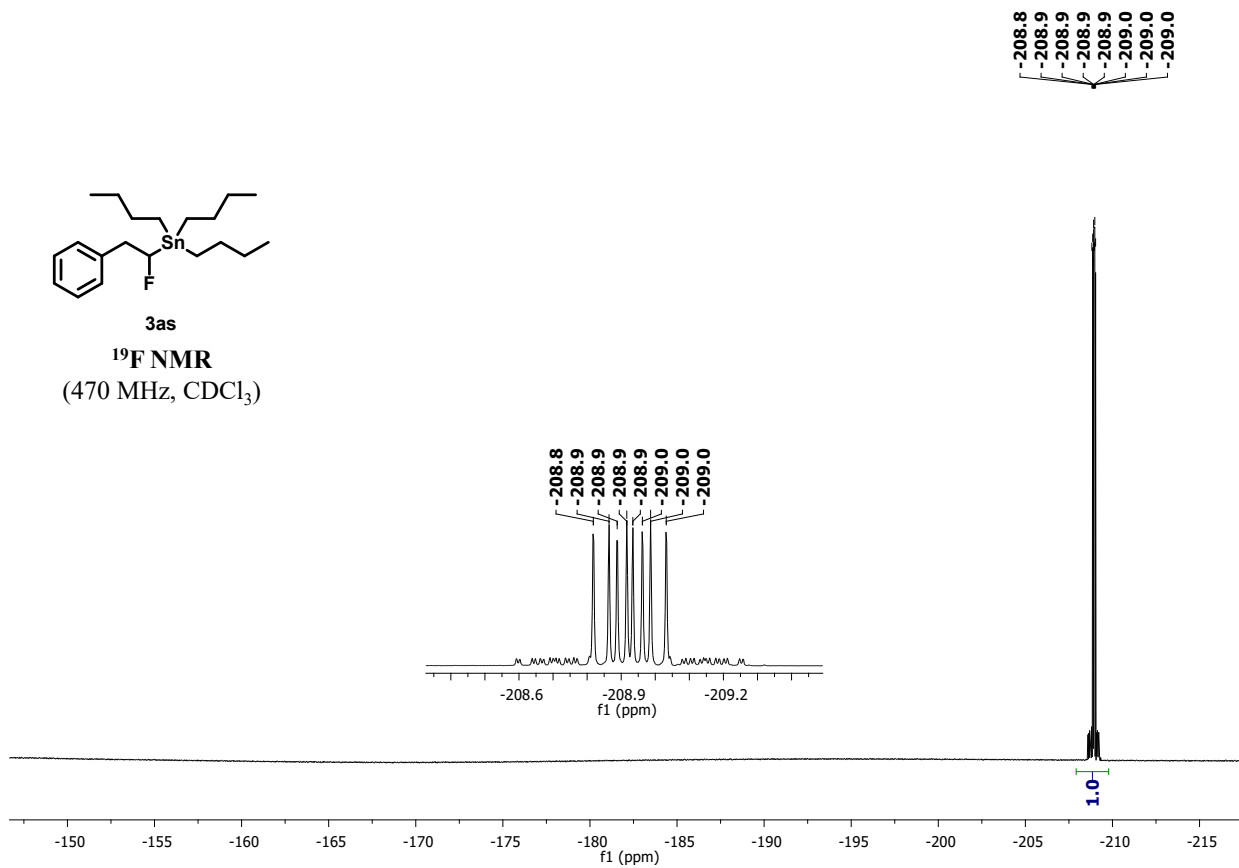

7.95  
7.95  
7.93  
7.93  
7.93  
7.60  
7.59  
7.49  
7.48  
7.48  
7.46  
7.33  
7.33  
7.32  
7.31  
7.29  
7.27  
7.27  
5.86  
5.79  
5.79  
5.78  
5.70  
5.69  
5.68  
3.38  
3.37  
3.35  
3.34  
3.31  
3.31  
3.29  
3.28  
3.28  
3.26  
3.25  
3.23  
3.22  
3.20

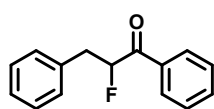

3at

<sup>1</sup>H NMR  
(500 MHz, CDCl<sub>3</sub>)

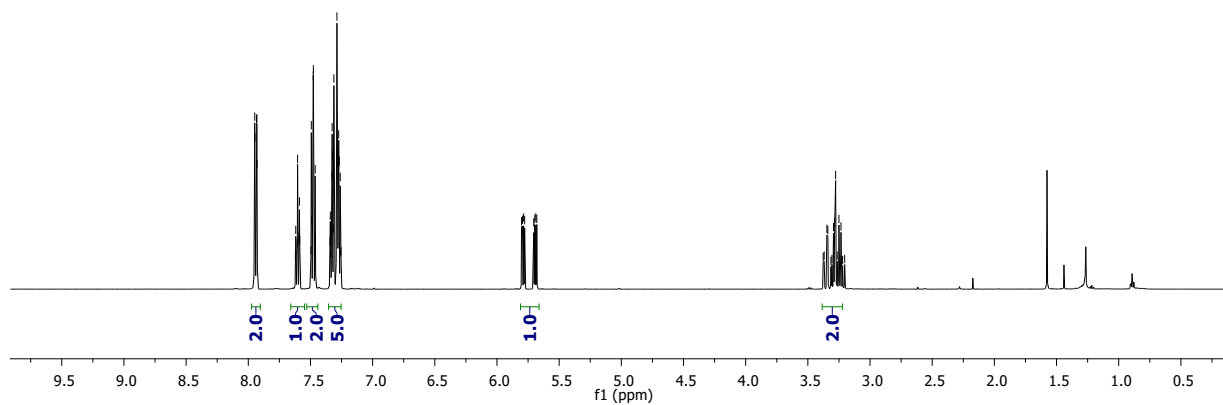



7.33  
7.31  
7.30  
7.27  
7.27  
7.26  
7.24  
7.23  
7.22  
4.97  
4.96  
4.95  
4.87  
4.87  
4.86  
4.85  
3.23  
3.22  
3.20  
3.19  
3.17  
3.16  
3.14  
3.13  
3.08  
3.07  
3.05  
3.04  
3.03  
3.01  
3.00  
2.99  
2.48  
2.48  
2.47  
2.46  
2.45  
2.44  
2.44  
2.43  
2.27  
2.26  
2.25  
2.25  
2.23  
2.23  
2.22  
2.21  
2.14  
2.13  
2.12  
2.10  
2.09  
0.91  
0.89  
0.86  
0.84

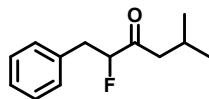

**3au**  
**<sup>1</sup>H NMR**  
(500 MHz, CDCl<sub>3</sub>)

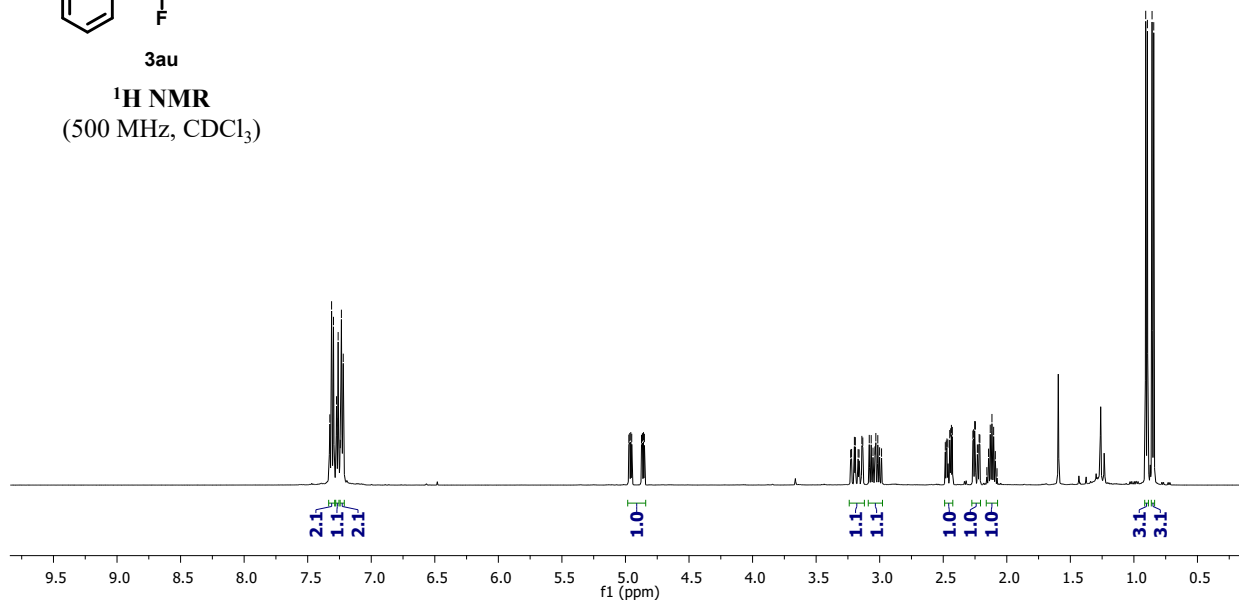

209.6  
209.4

135.6  
129.7  
128.7  
127.2

96.8  
95.4

47.5  
38.4  
38.2

23.5  
23.5  
22.7  
22.6

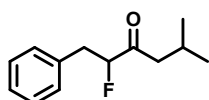

**3au**  
**<sup>13</sup>C NMR**  
(125 MHz, CDCl<sub>3</sub>)

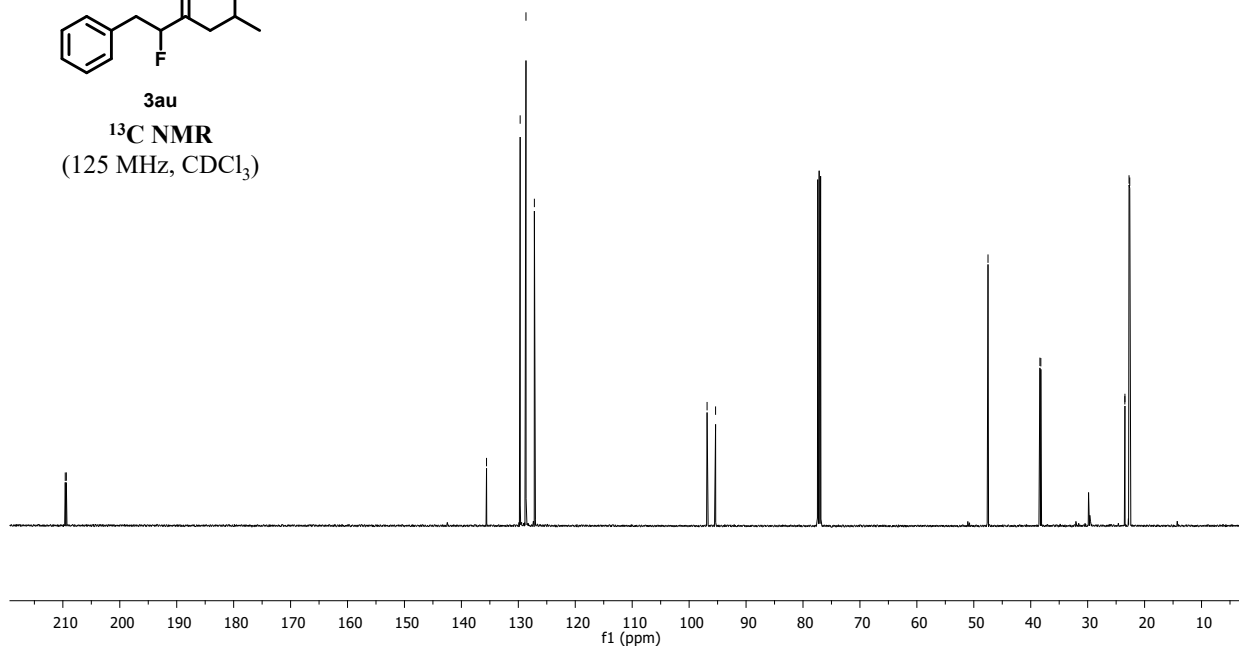

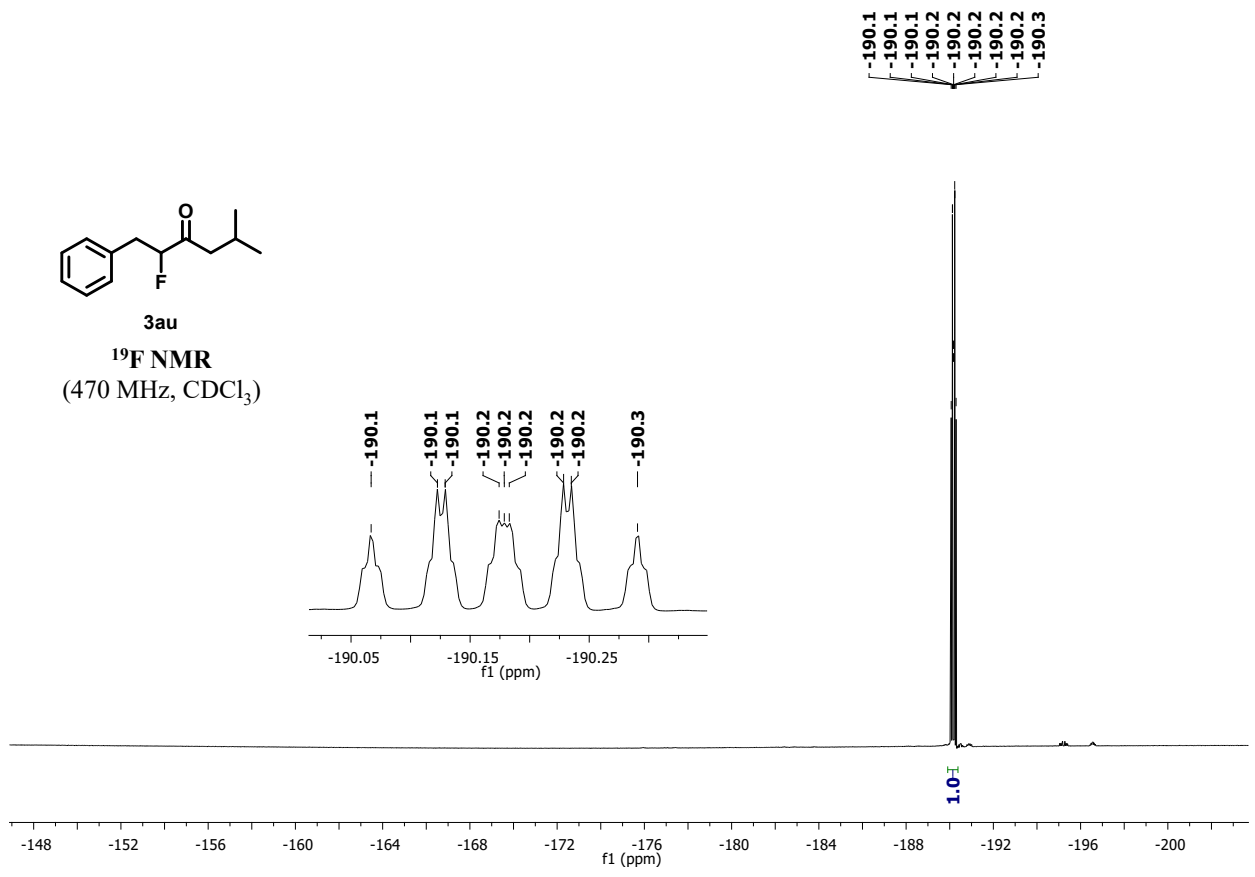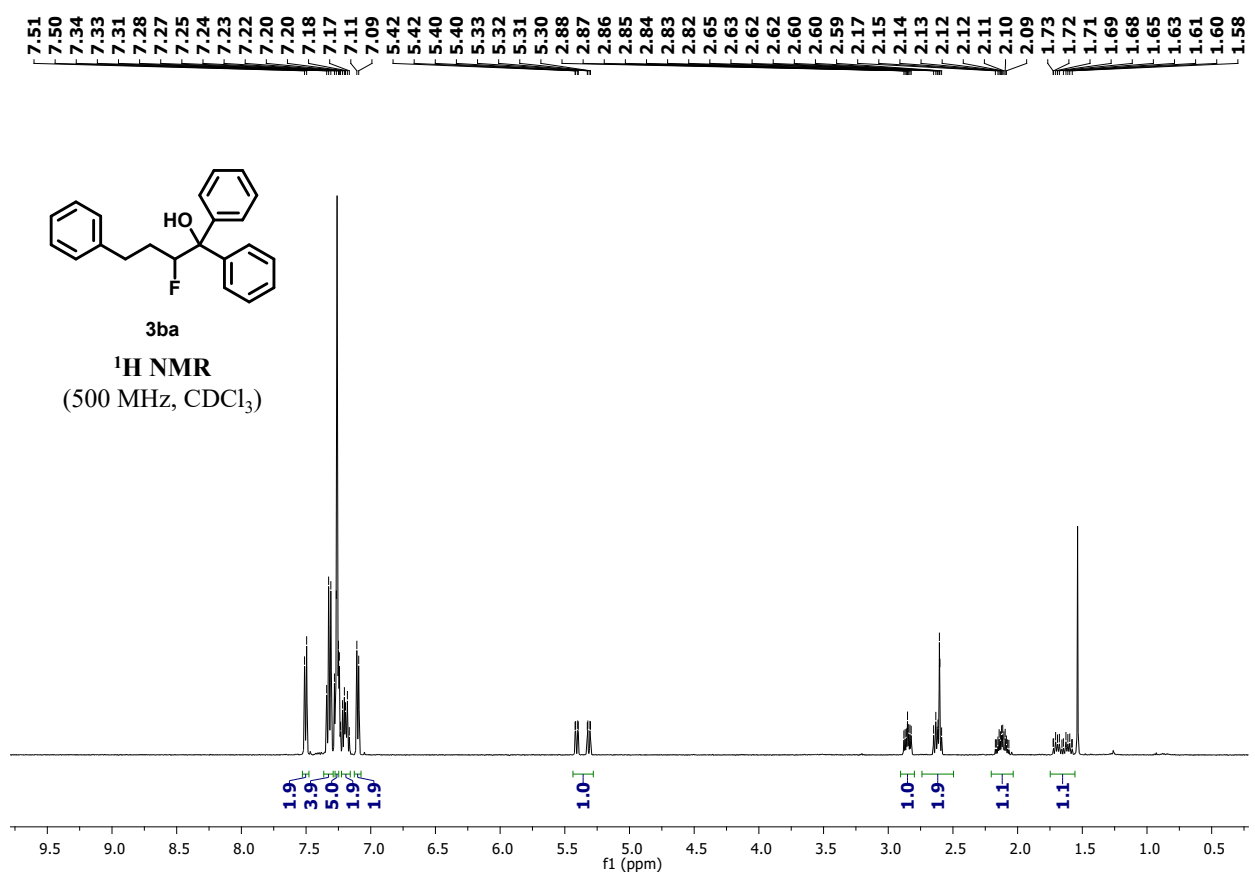

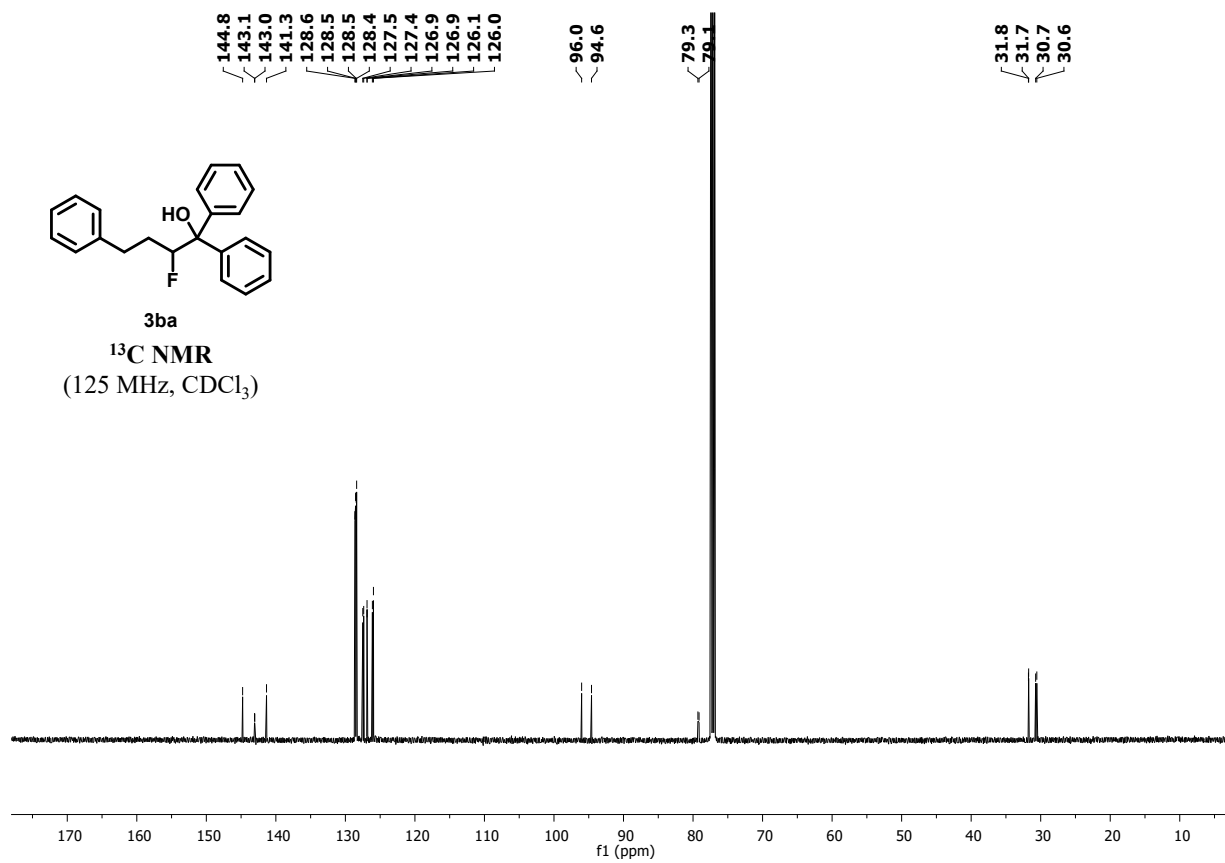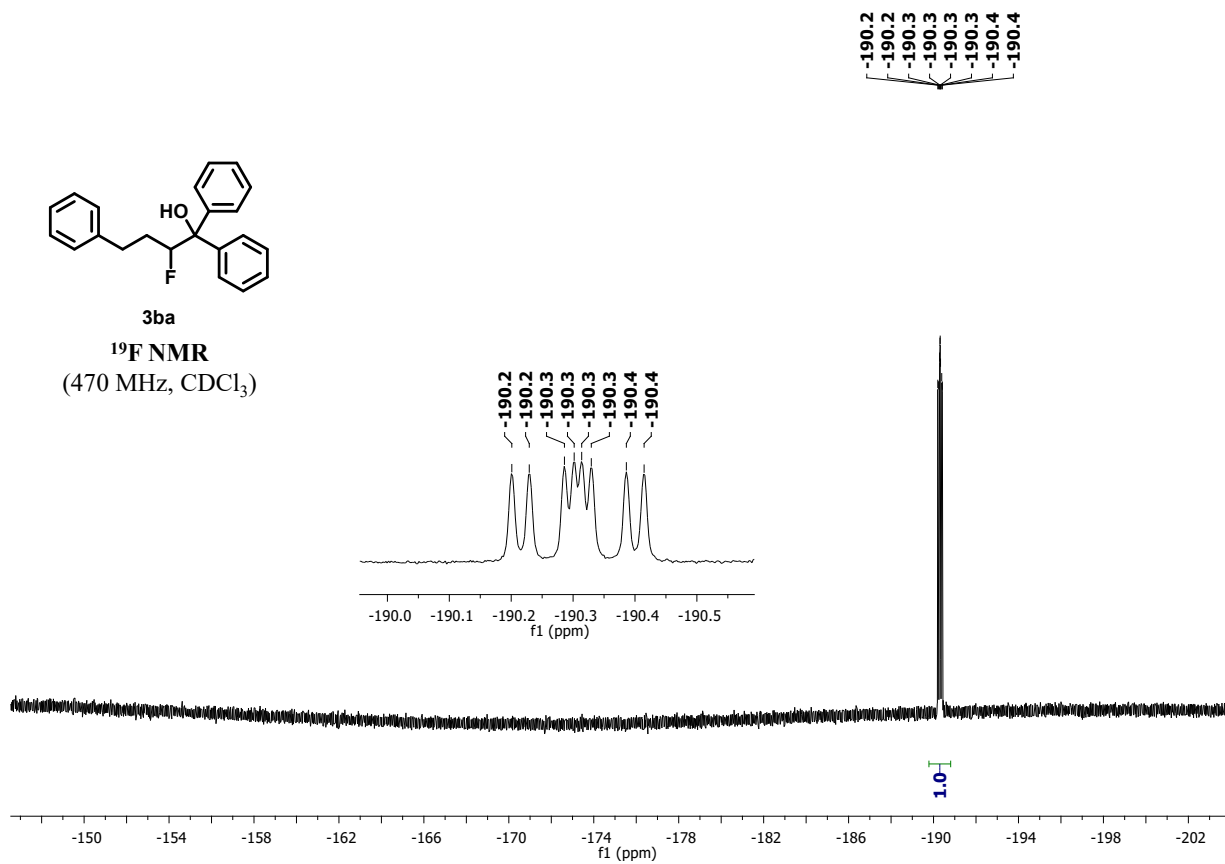

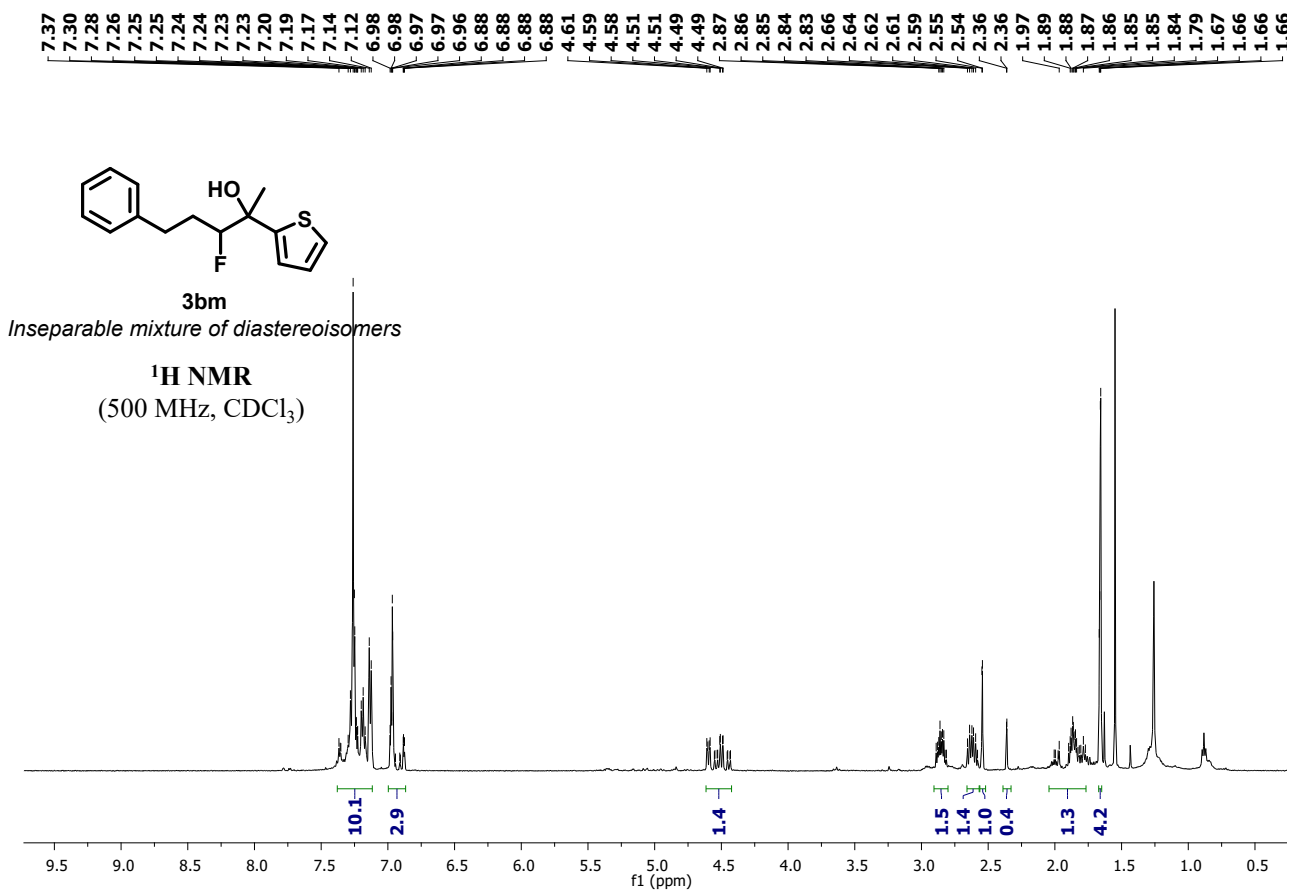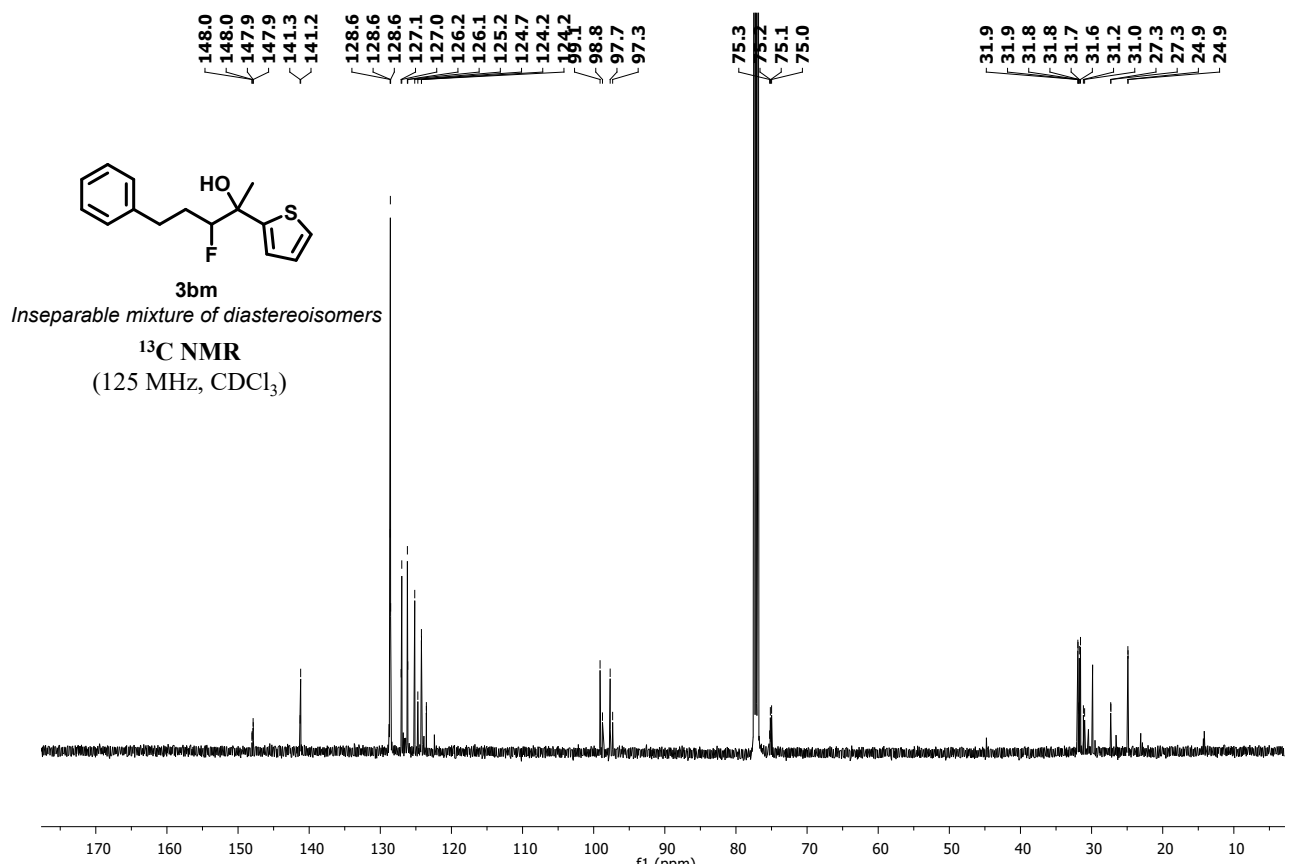

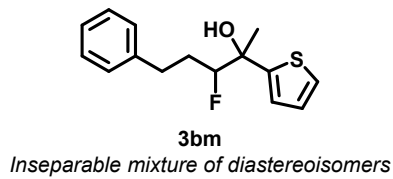

**<sup>19</sup>F NMR**  
(470 MHz, CDCl<sub>3</sub>)

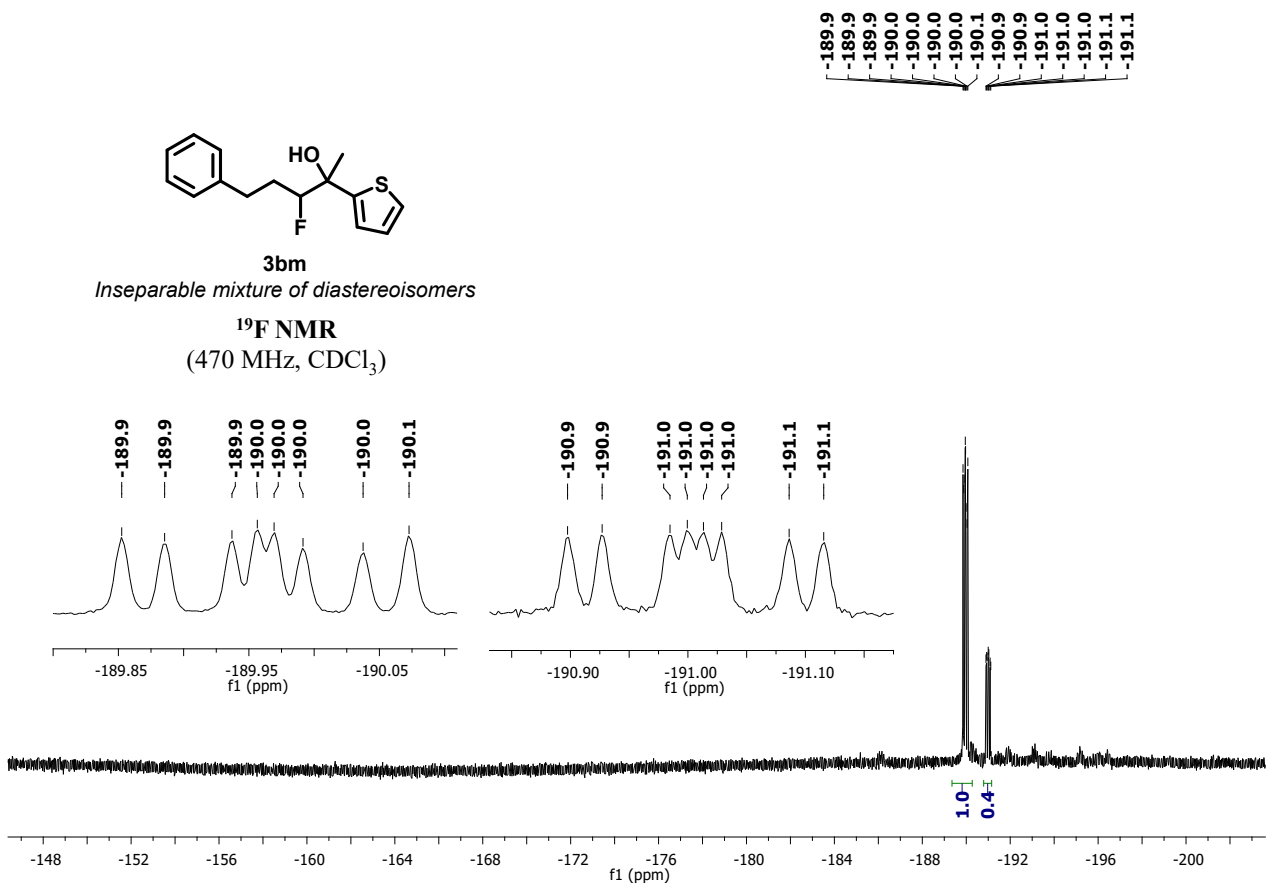

7.31, 7.30, 7.28, 7.22, 7.20, 7.19, 4.45, 2.93, 2.92, 2.91, 2.90, 2.89, 2.88, 2.87, 2.85, 2.73, 2.72, 2.71, 2.70, 2.69, 2.68, 2.66, 2.09, 2.08, 2.07, 2.06, 2.05, 2.04, 1.90, 1.88, 1.87, 1.85, 1.84, 1.83, 1.82, 1.80, 1.72, 1.56, 1.48, 1.47, 1.47, 1.46, 1.45, 1.44, 1.43, 1.42, 1.41, 1.40, 1.28, 1.26, 0.89, 0.88, 0.87

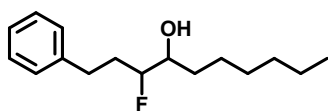

**3bn**  
*Inseparable mixture of diastereoisomers*

**<sup>1</sup>H NMR**  
(500 MHz, CDCl<sub>3</sub>)

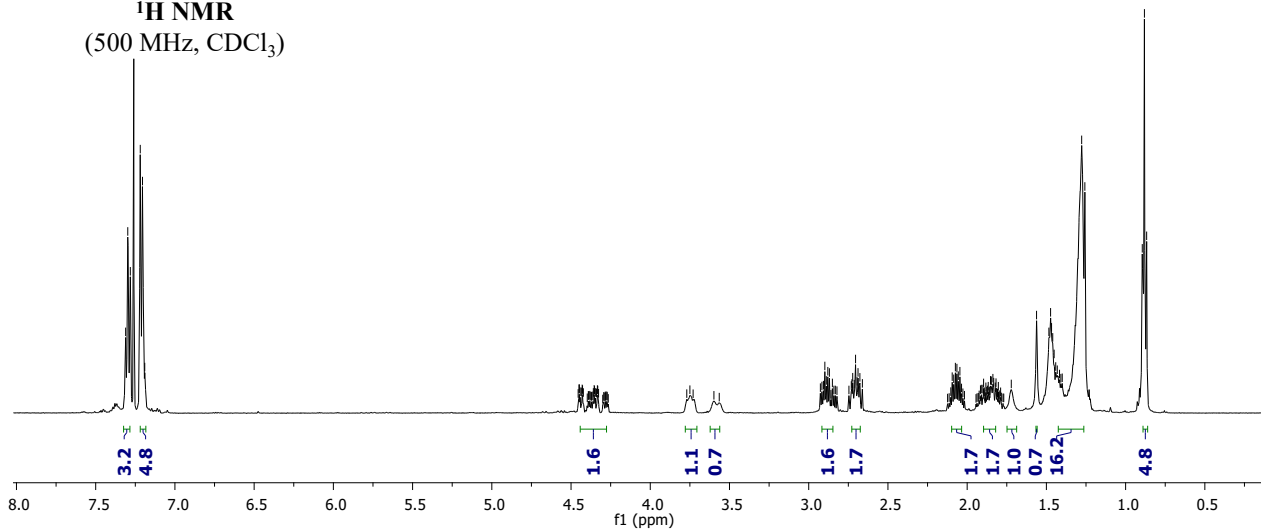



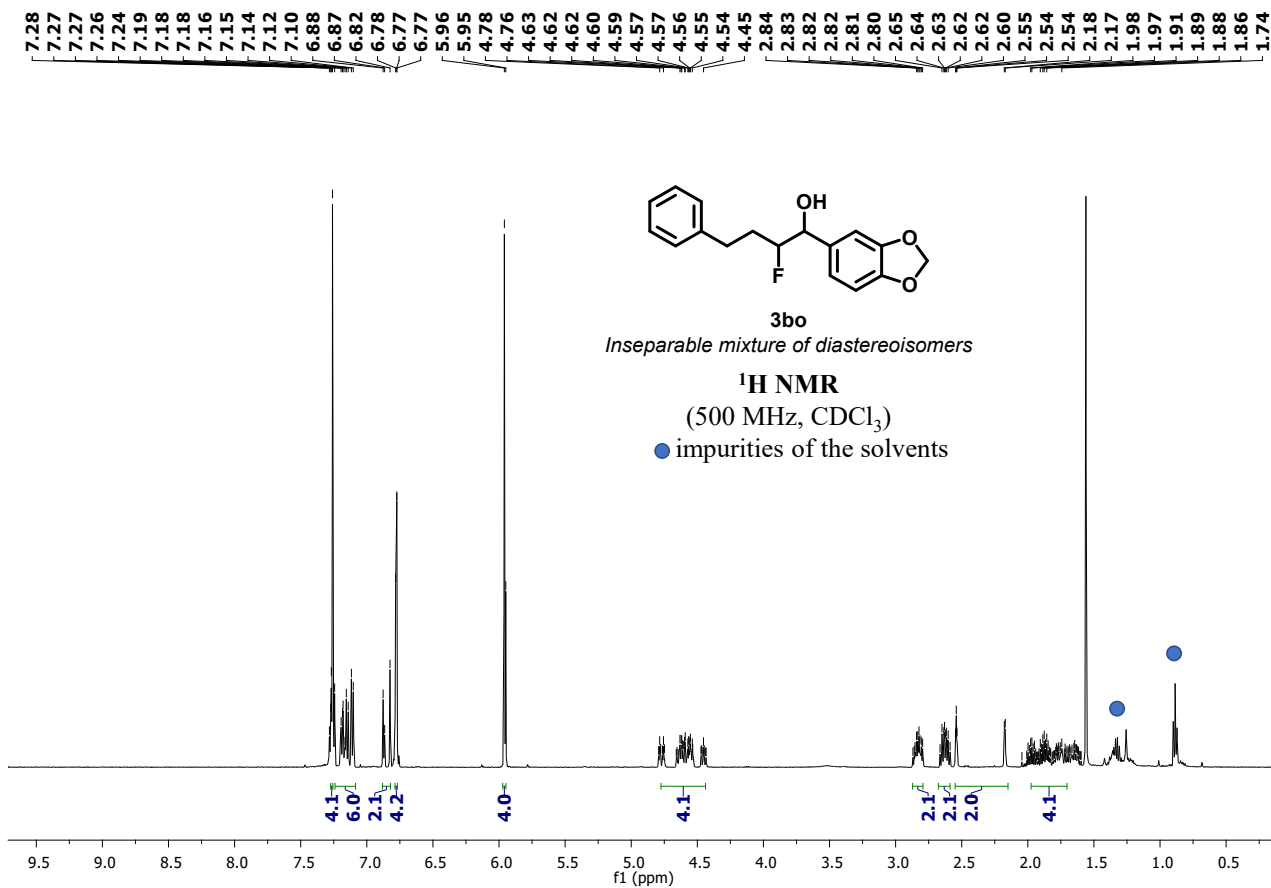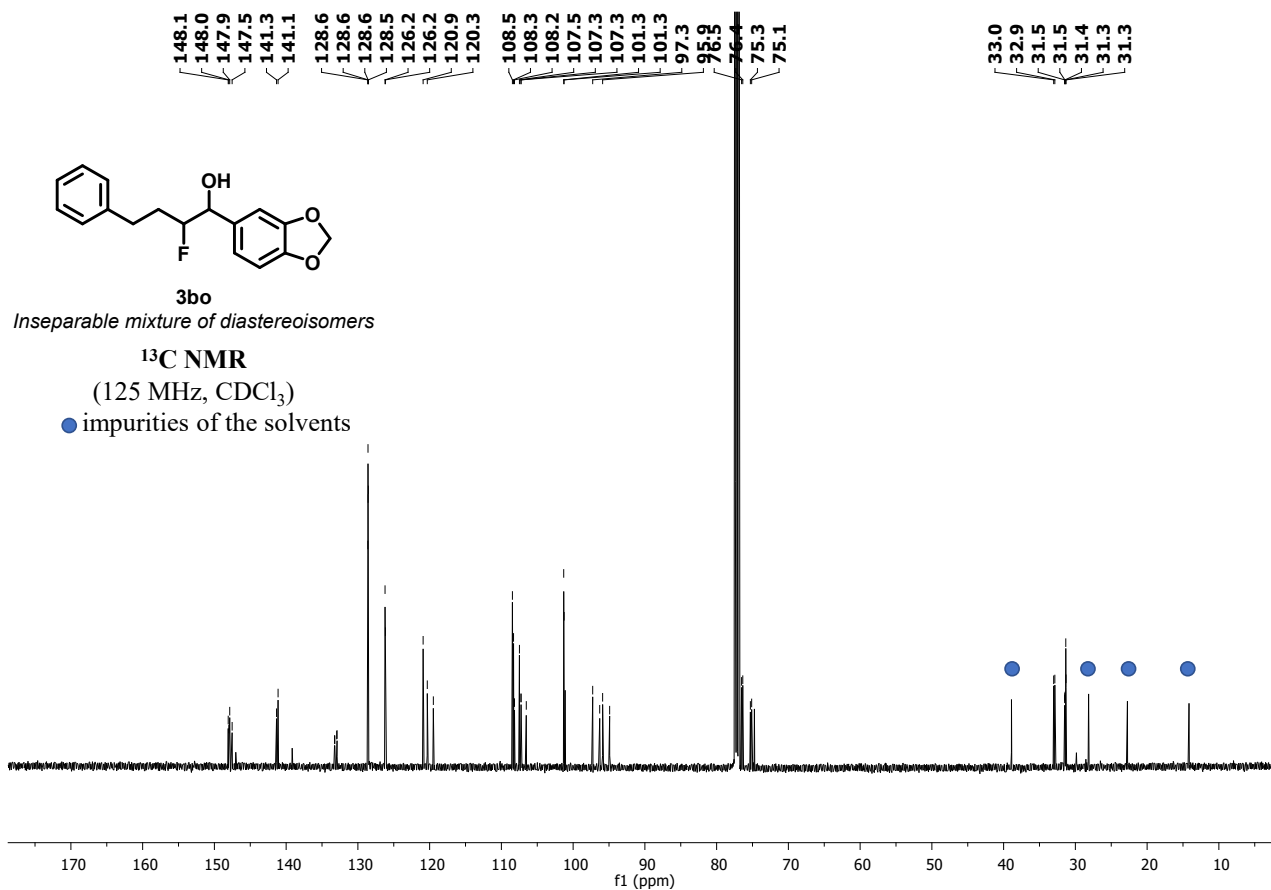

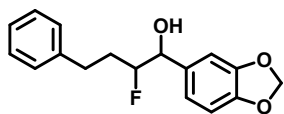

**3bo**

*Inseparable mixture of diastereoisomers*

**<sup>19</sup>F NMR**  
(470 MHz, CDCl<sub>3</sub>)

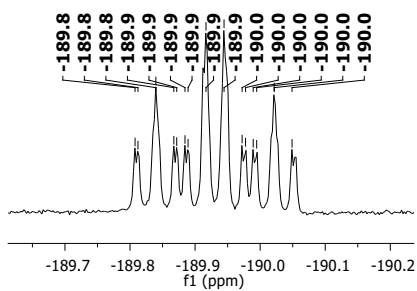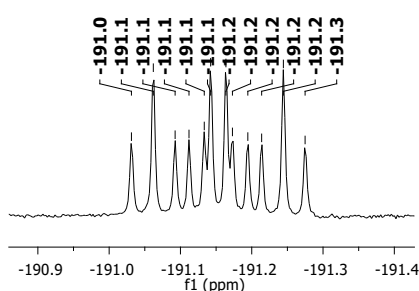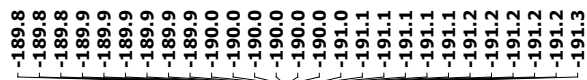

1.0H  
1.0H

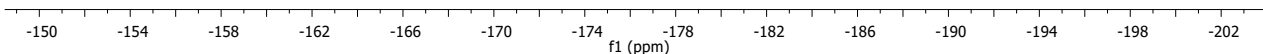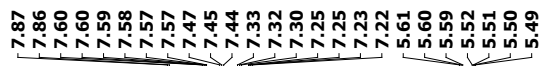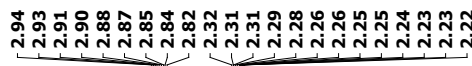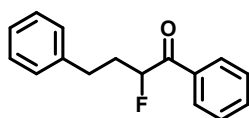

**3bt**

**<sup>1</sup>H NMR**  
(500 MHz, CDCl<sub>3</sub>)

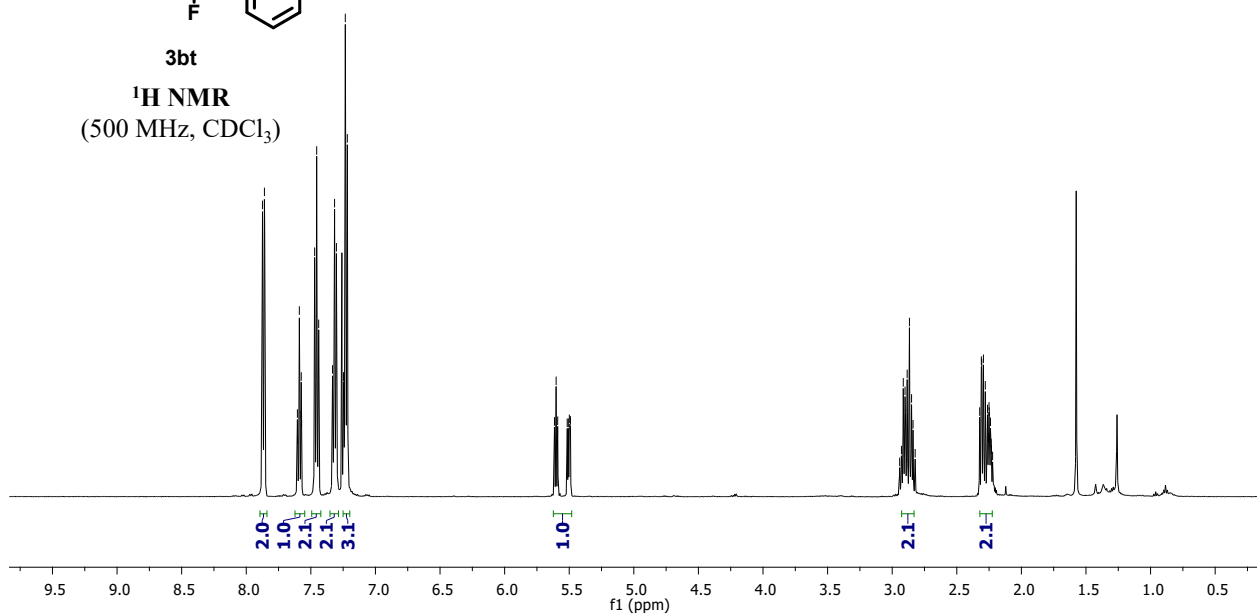



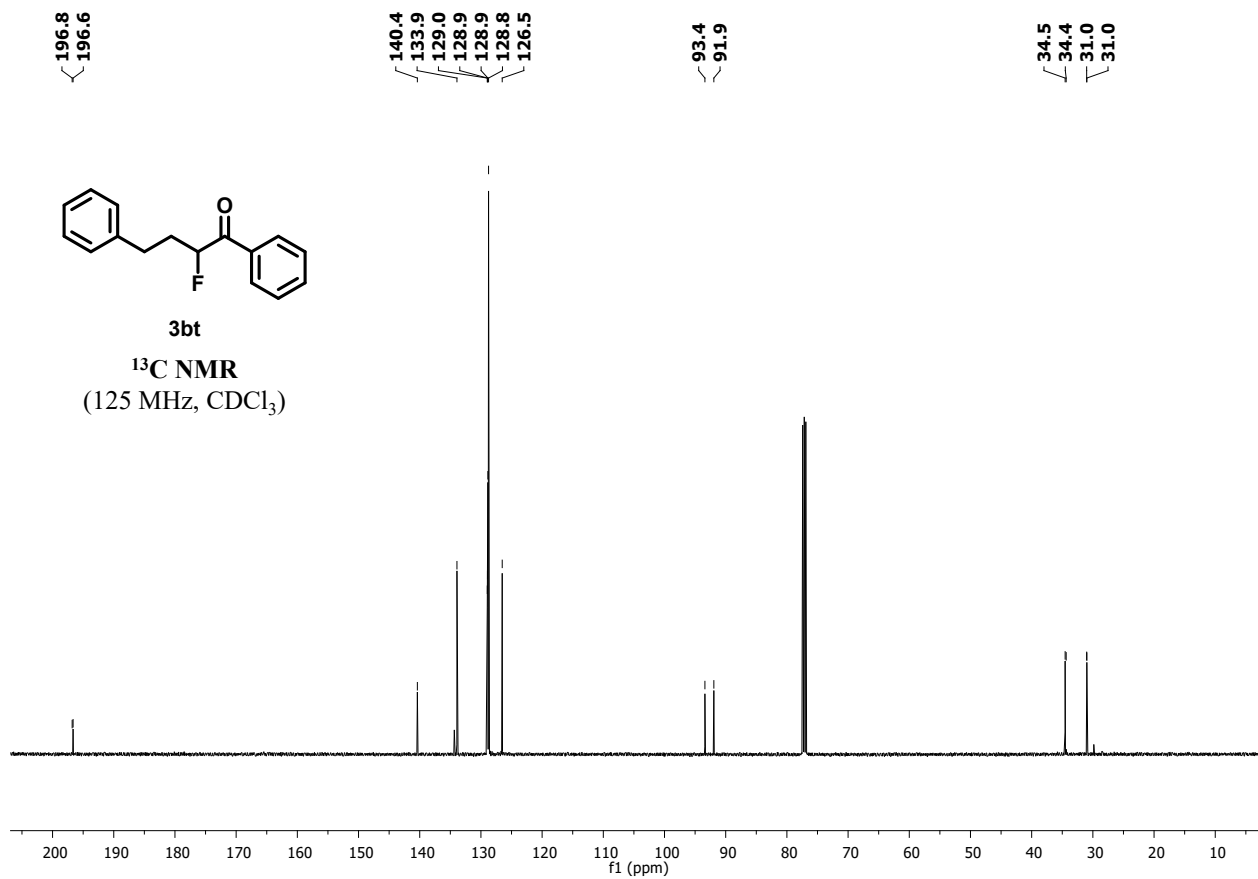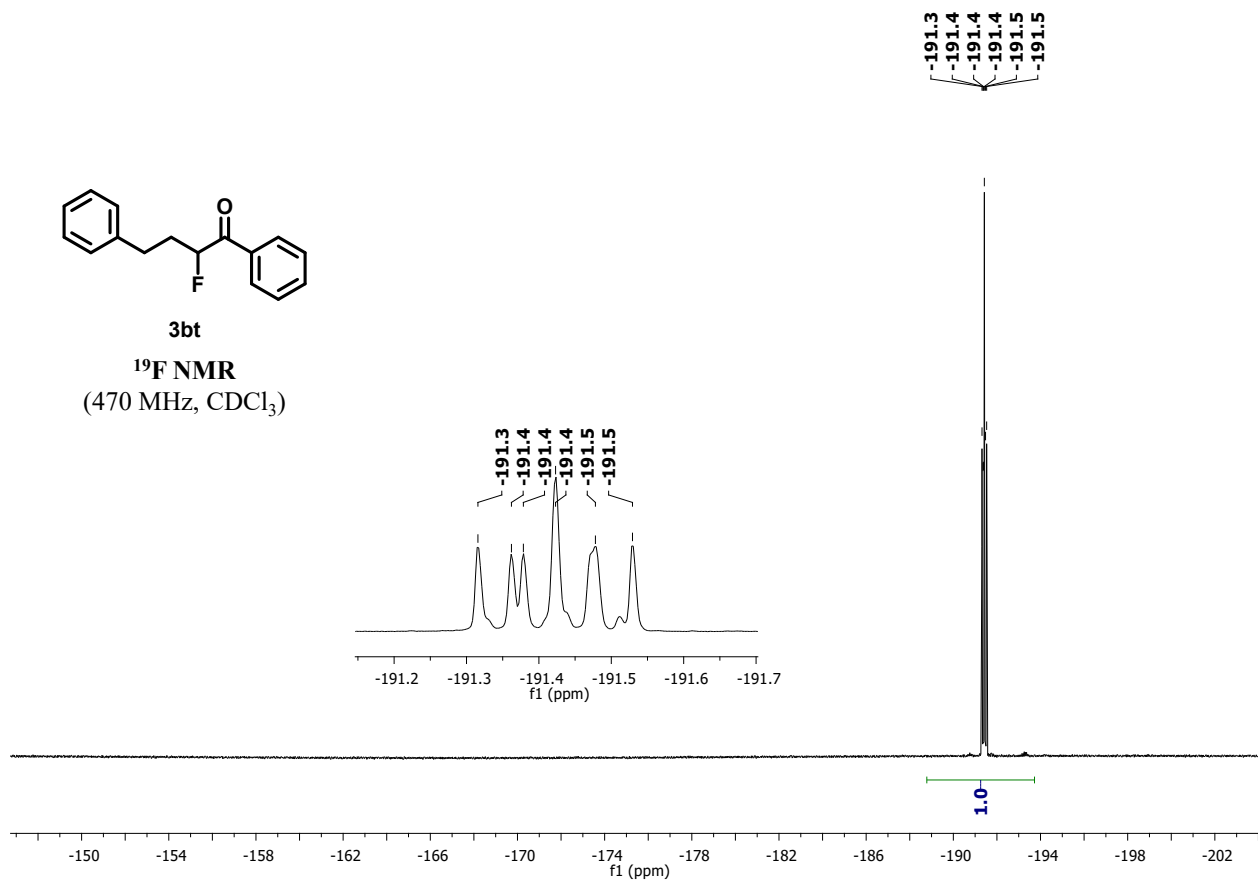



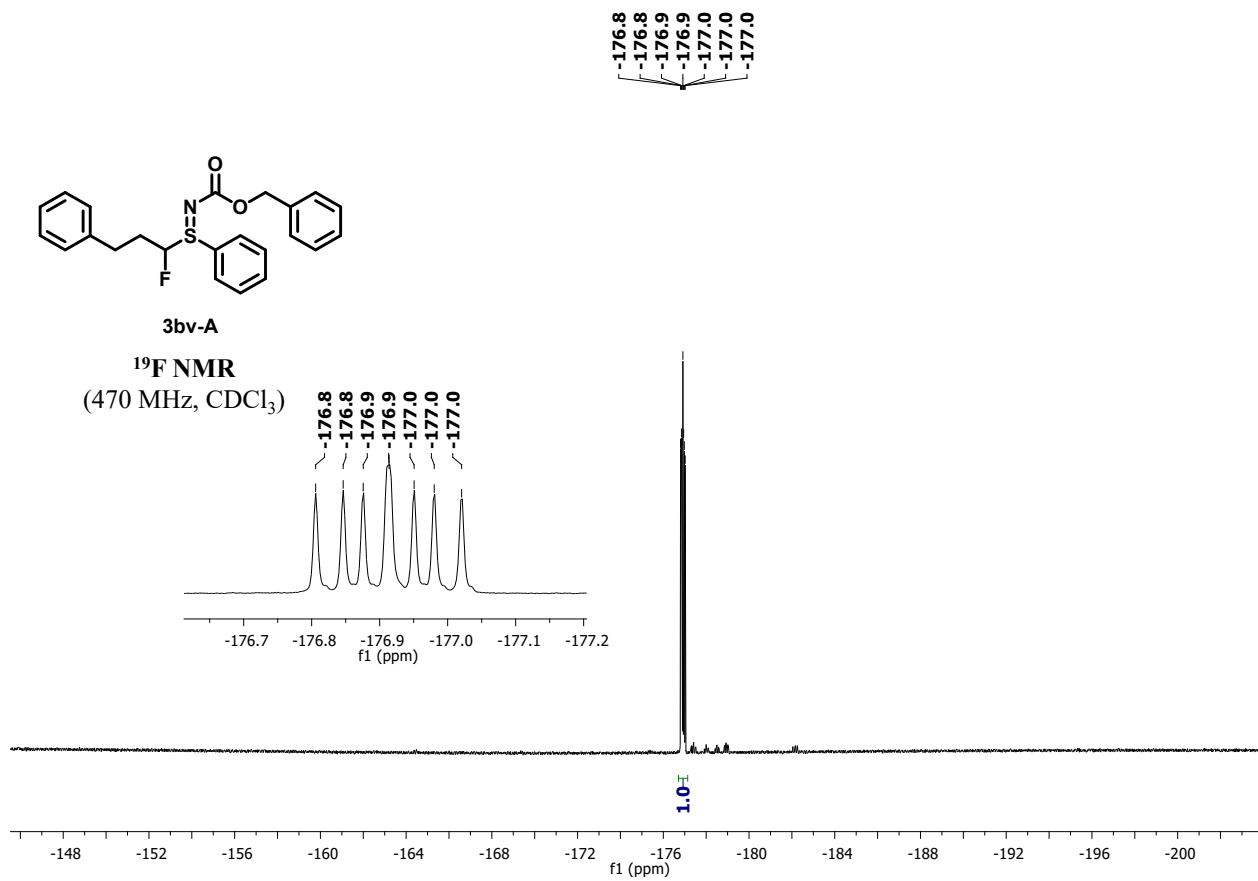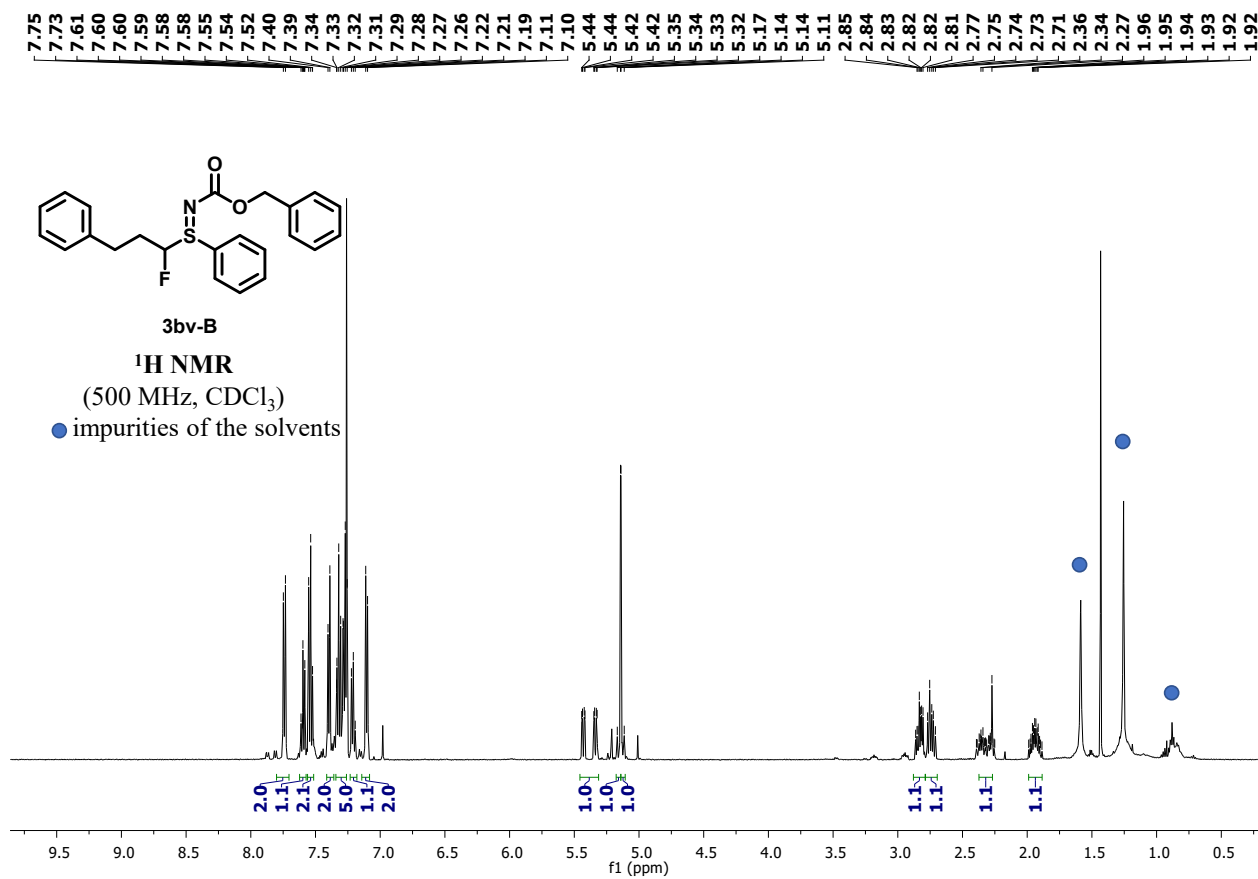

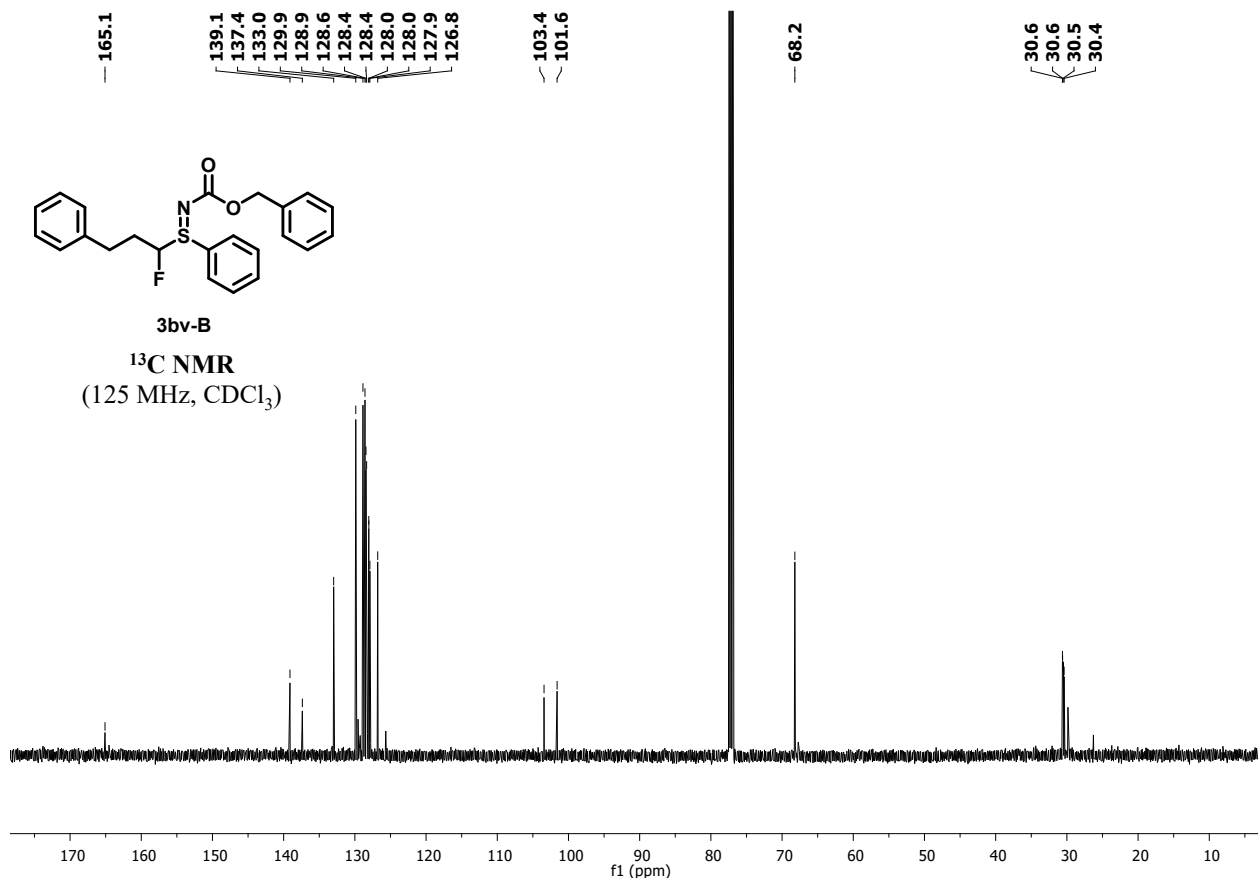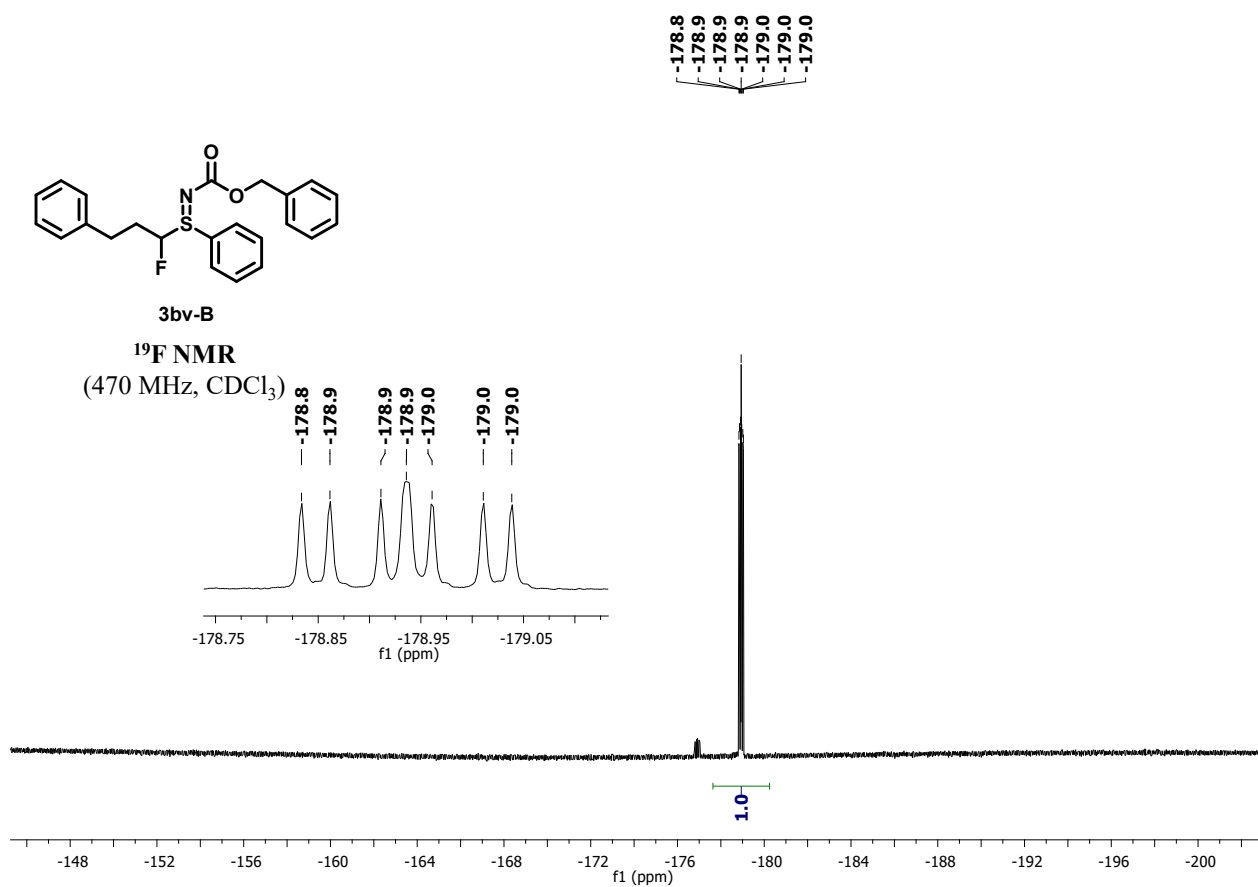

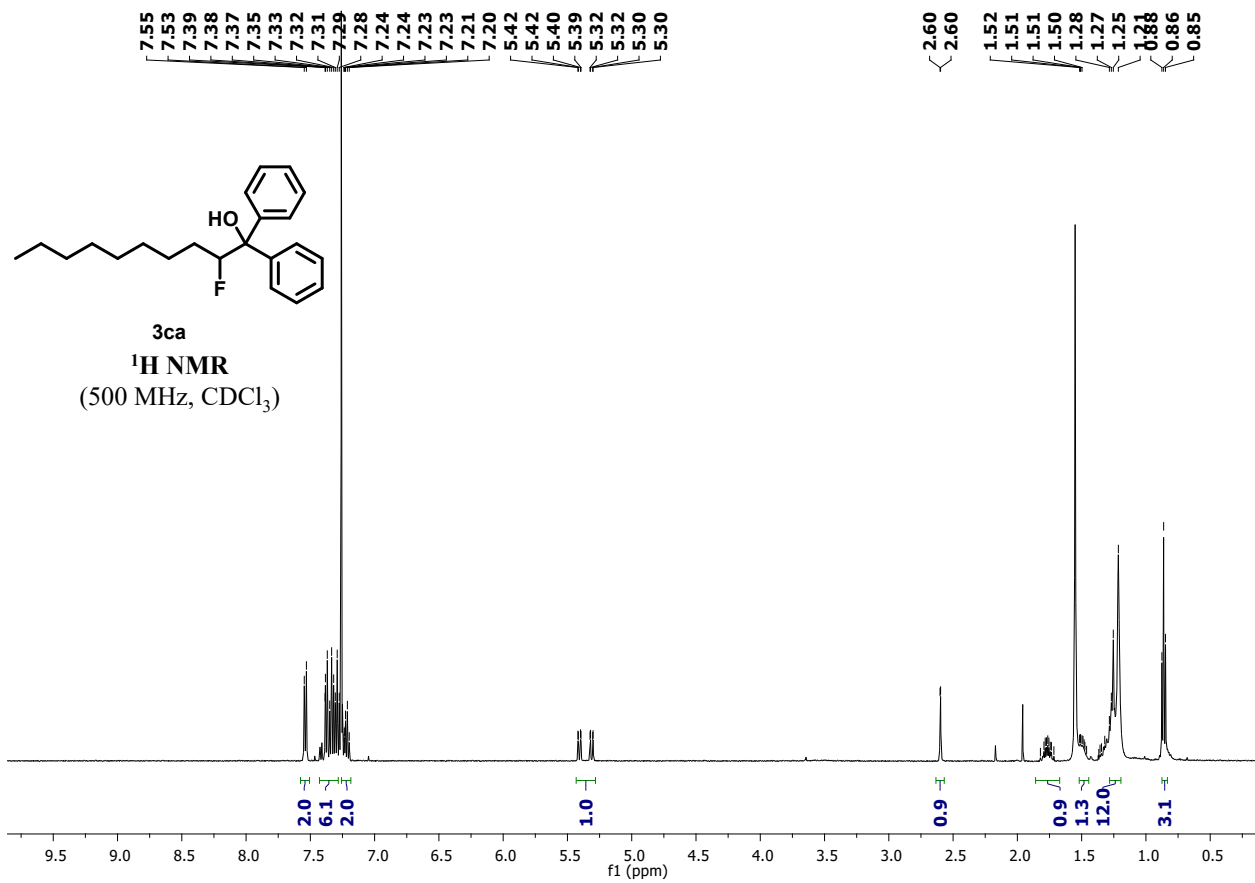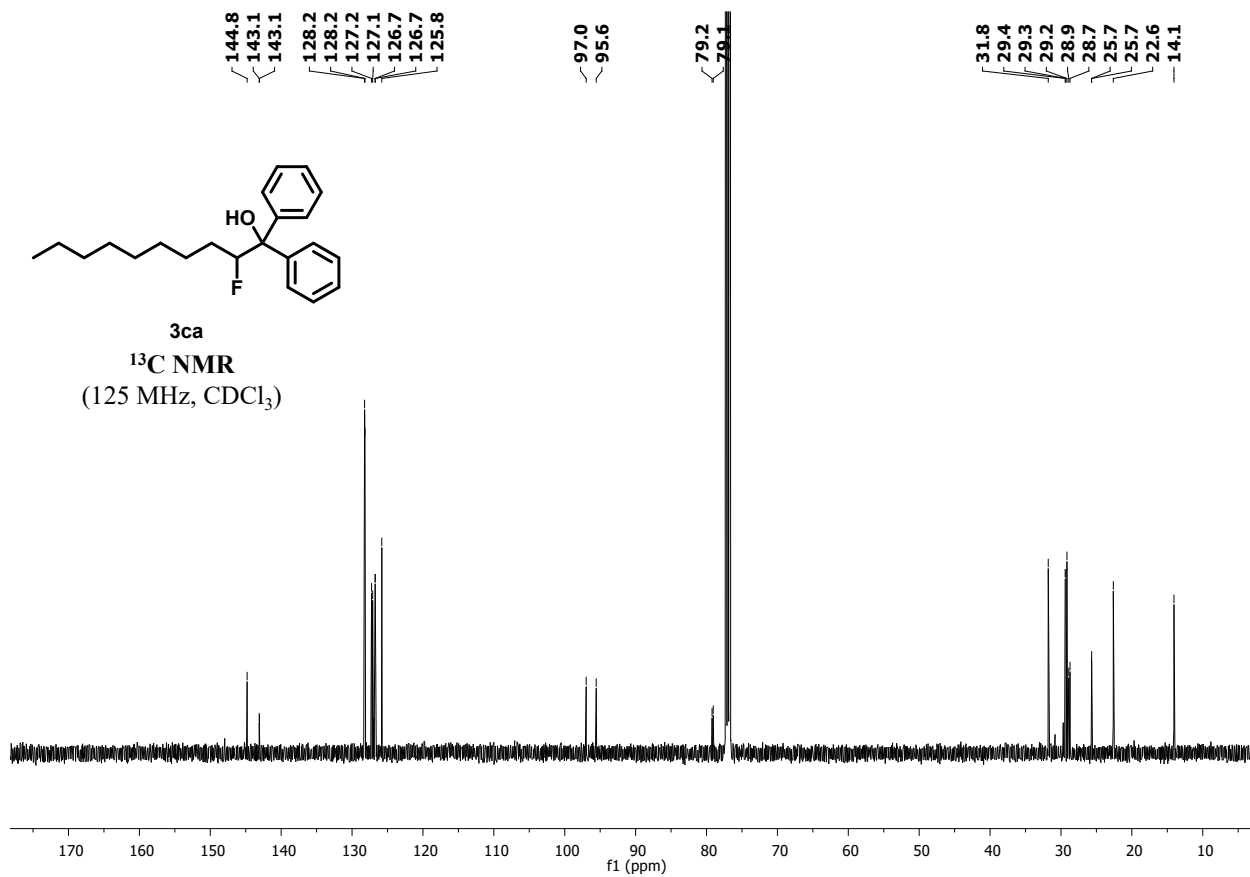

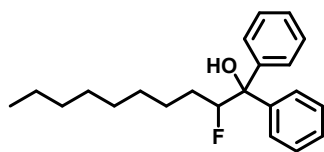

**3ca**

**$^{19}\text{F}$  NMR**  
(470 MHz,  $\text{CDCl}_3$ )

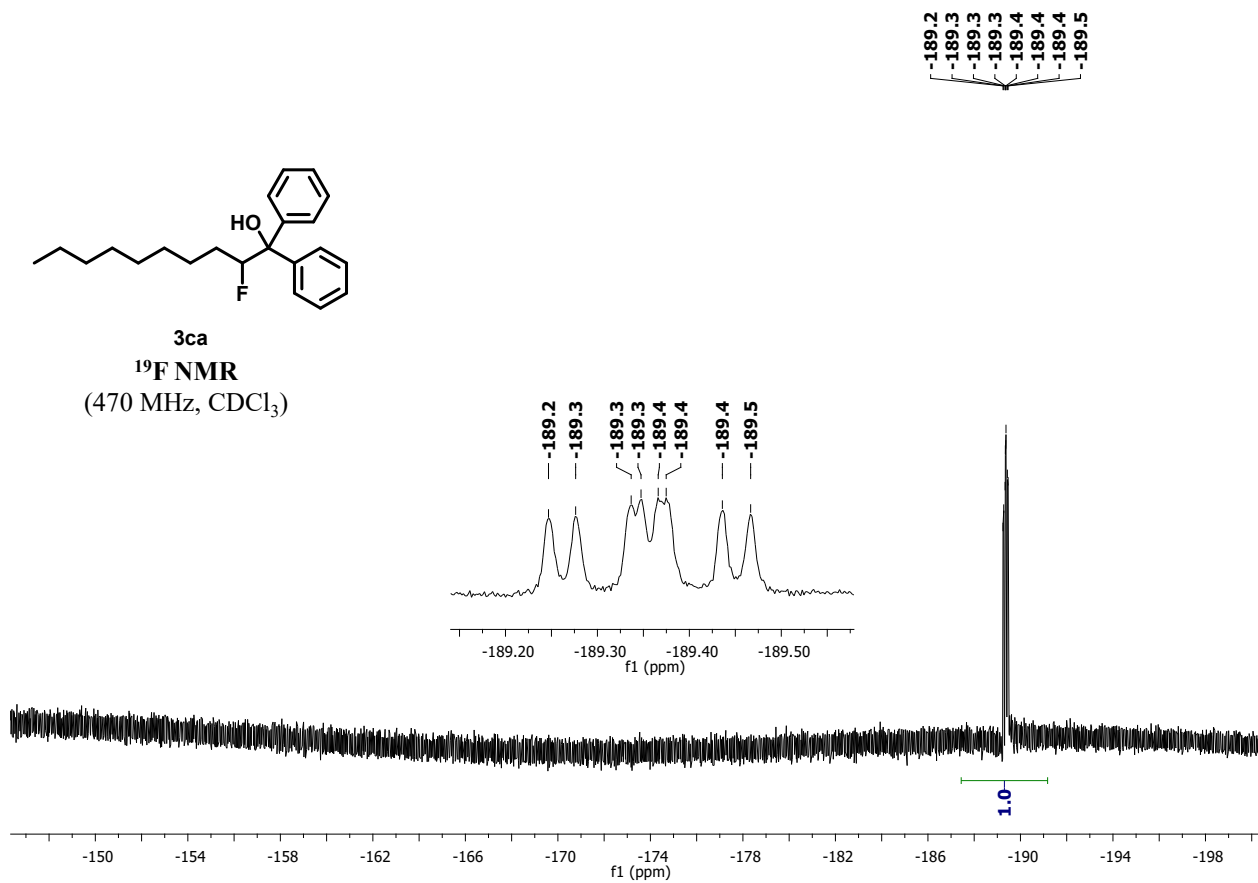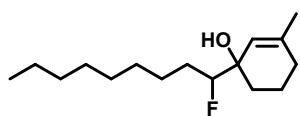

**3ce**

*Inseparable mixture of diastereoisomers*

**$^1\text{H}$  NMR**  
(500 MHz,  $\text{CDCl}_3$ )

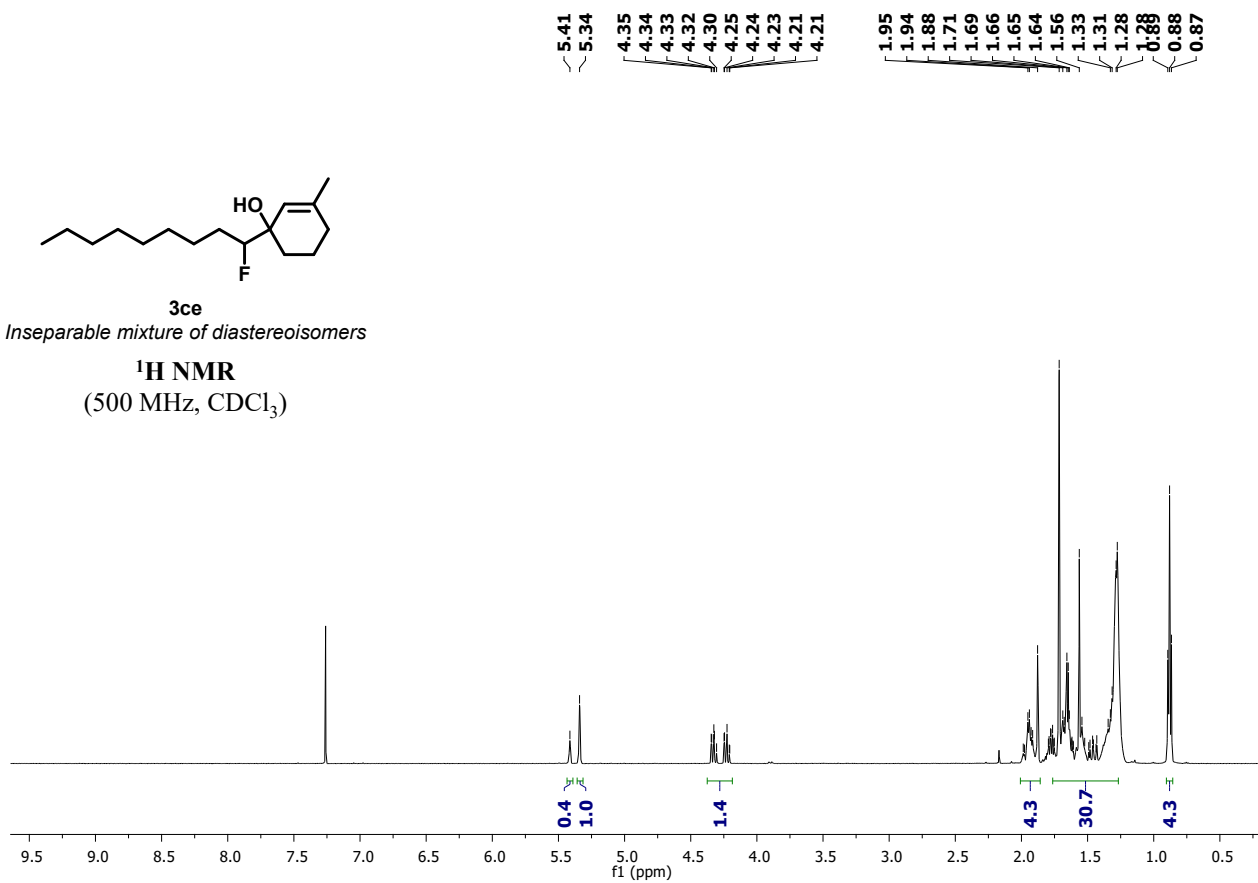

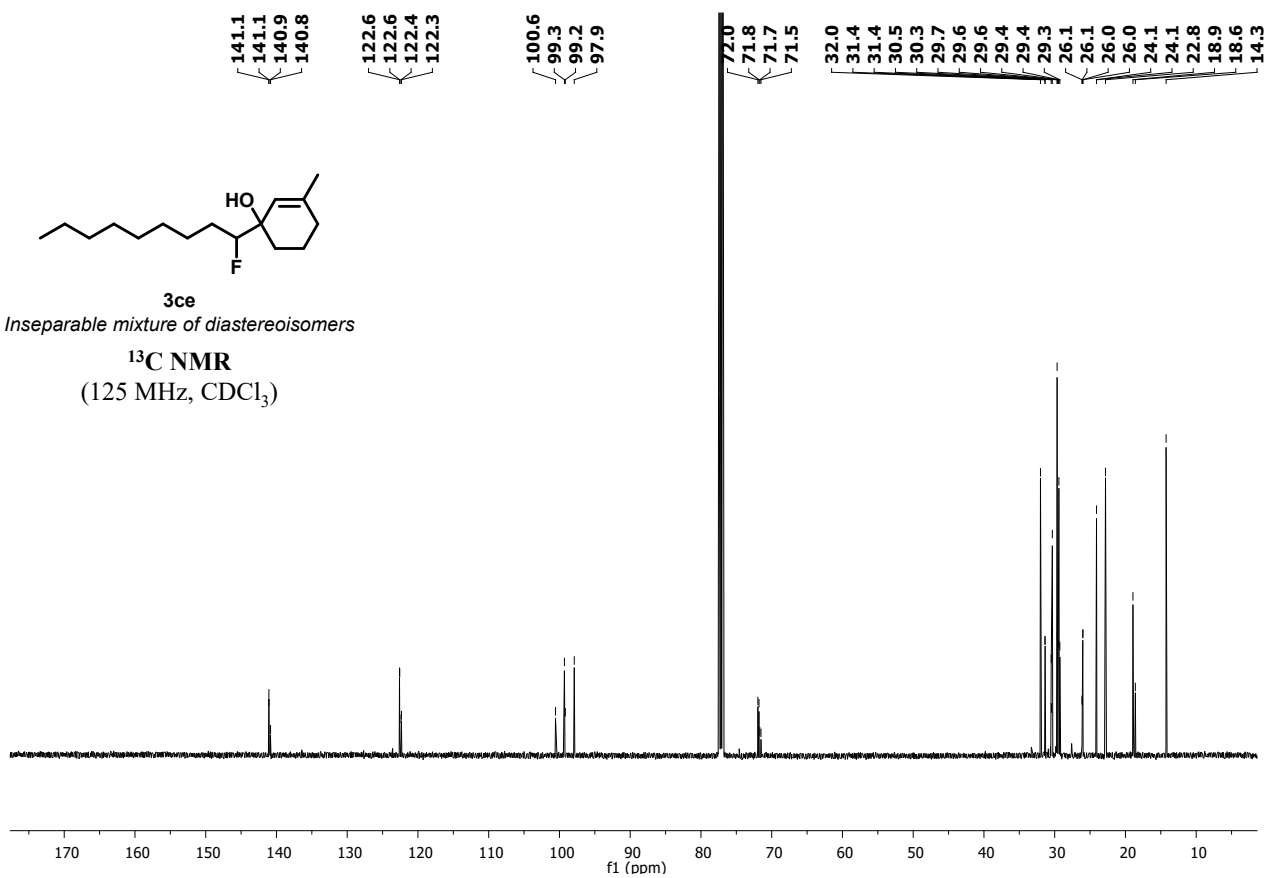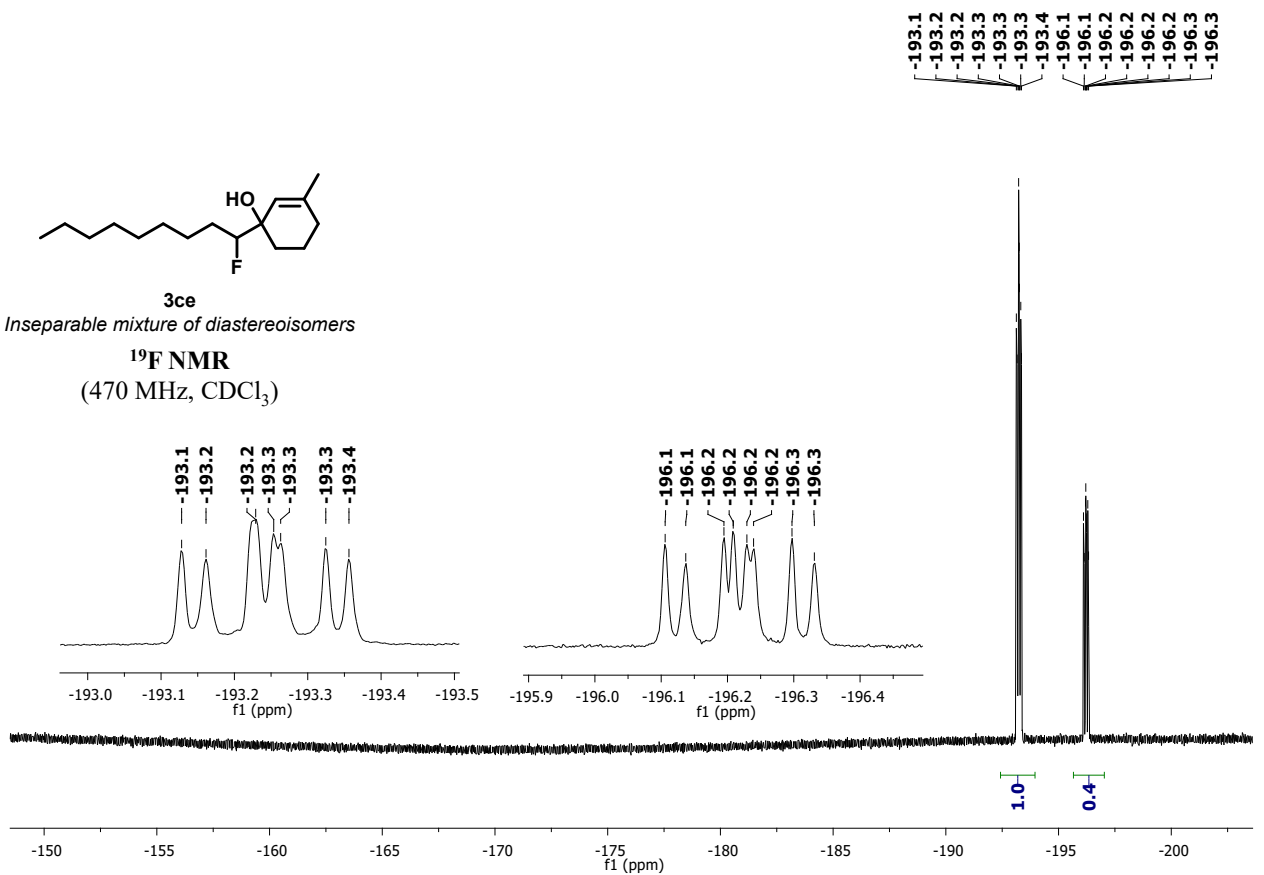

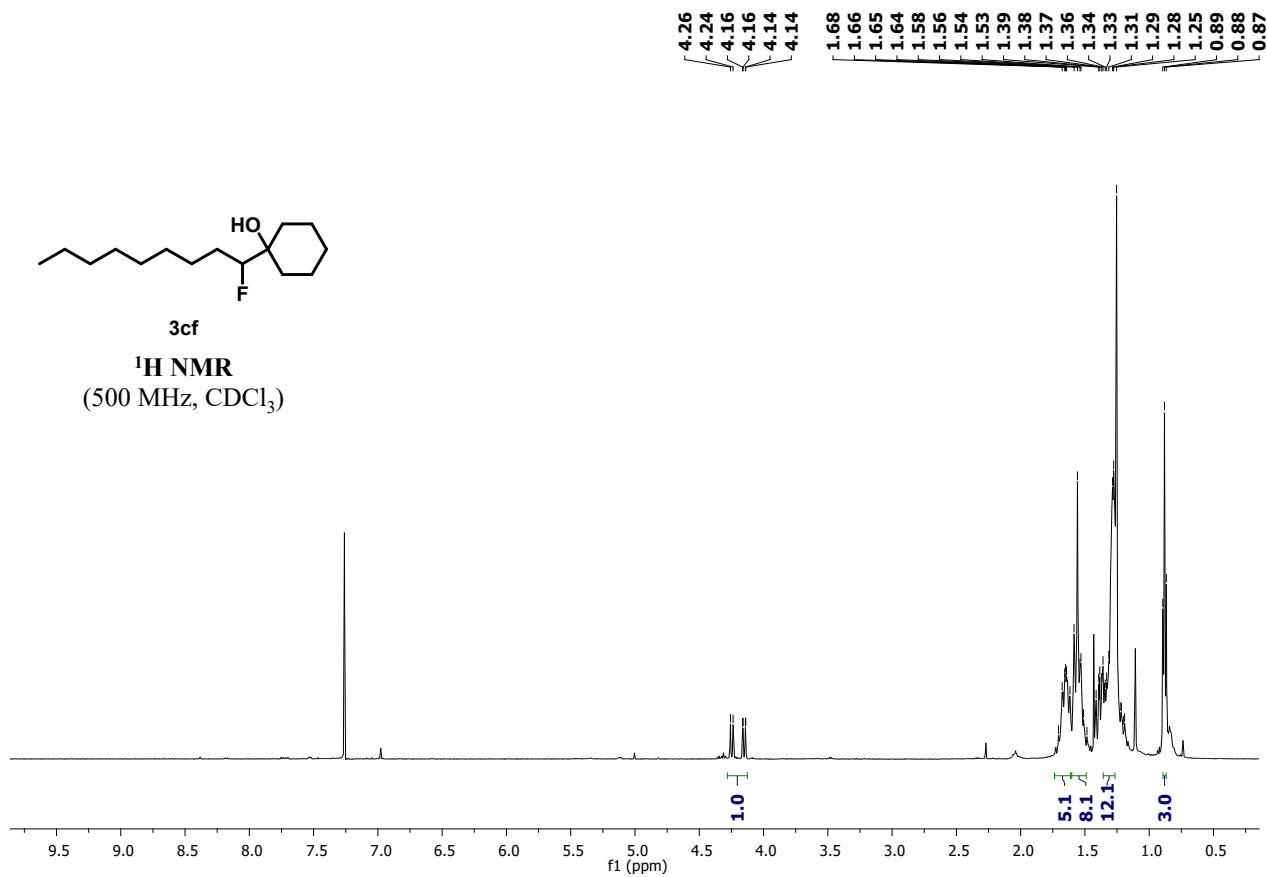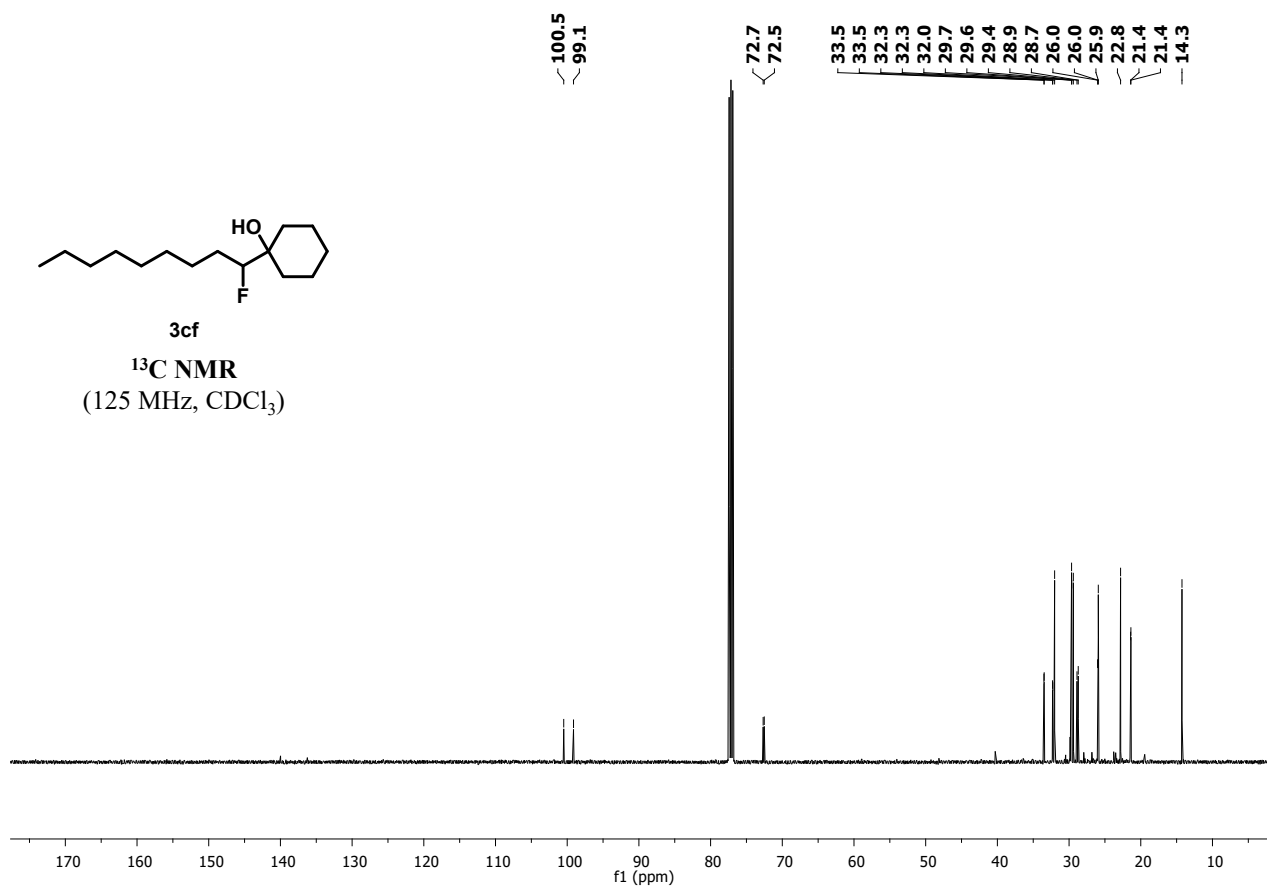



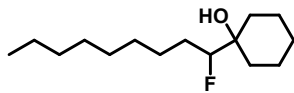

3cf

<sup>19</sup>F NMR  
(470 MHz, CDCl<sub>3</sub>)

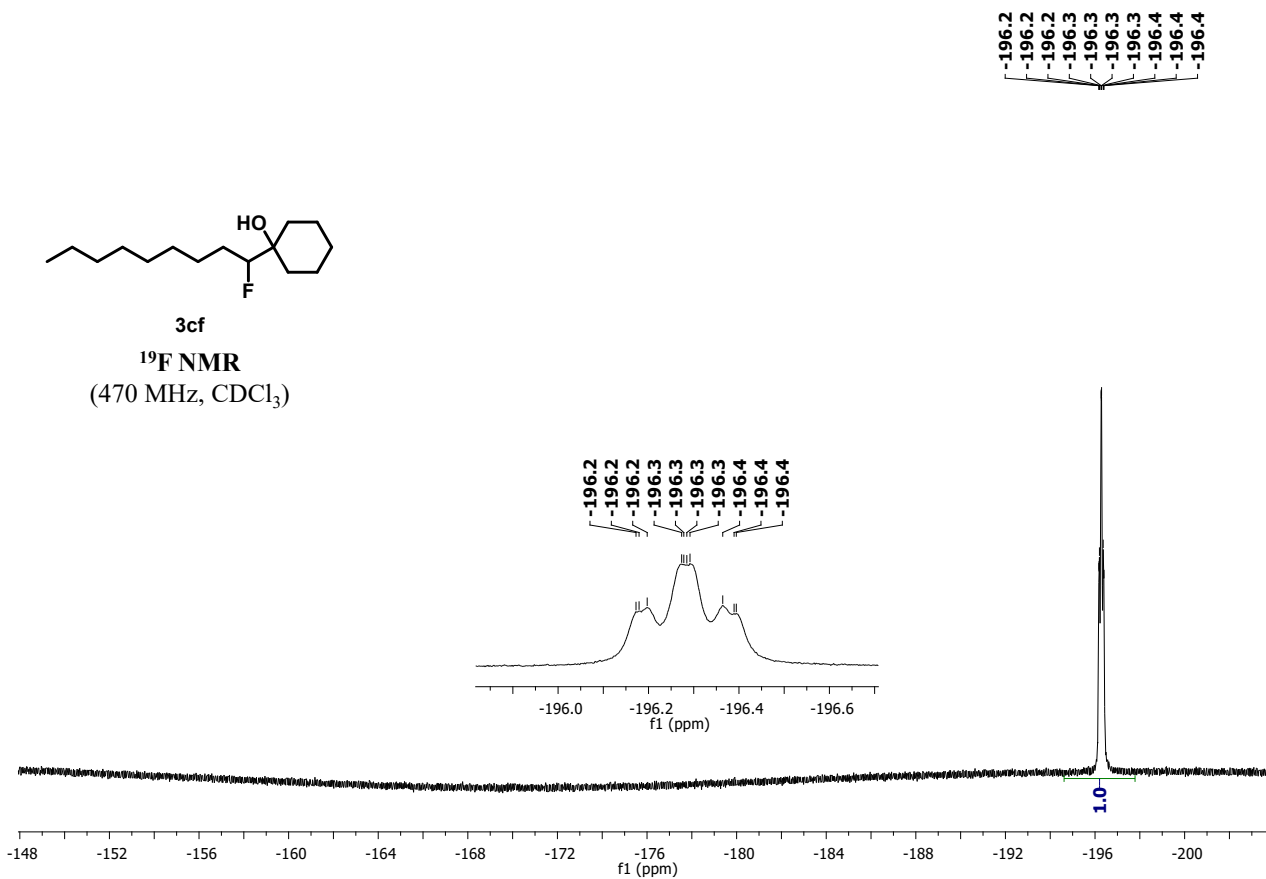

4.42  
4.40  
4.39  
4.32  
4.32  
4.30  
4.29  
1.80  
1.78  
1.55  
1.43  
1.42  
1.42  
1.37  
1.35  
1.34  
1.31  
1.29  
1.29  
1.28  
1.25  
0.90  
0.89  
0.88  
0.87  
0.86  
0.77  
0.76  
0.75  
0.74  
0.49  
0.49  
0.48  
0.48  
0.47  
0.47  
0.47  
0.46  
0.46  
0.45  
0.44  
0.43  
0.42  
0.42  
0.41  
0.40  
0.40  
0.39  
0.37  
0.36  
0.35  
0.35  
0.34  
0.34  
0.32  
0.31

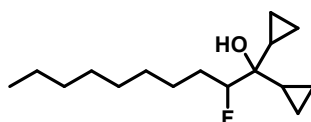

3ck

<sup>1</sup>H NMR  
(500 MHz, CDCl<sub>3</sub>)

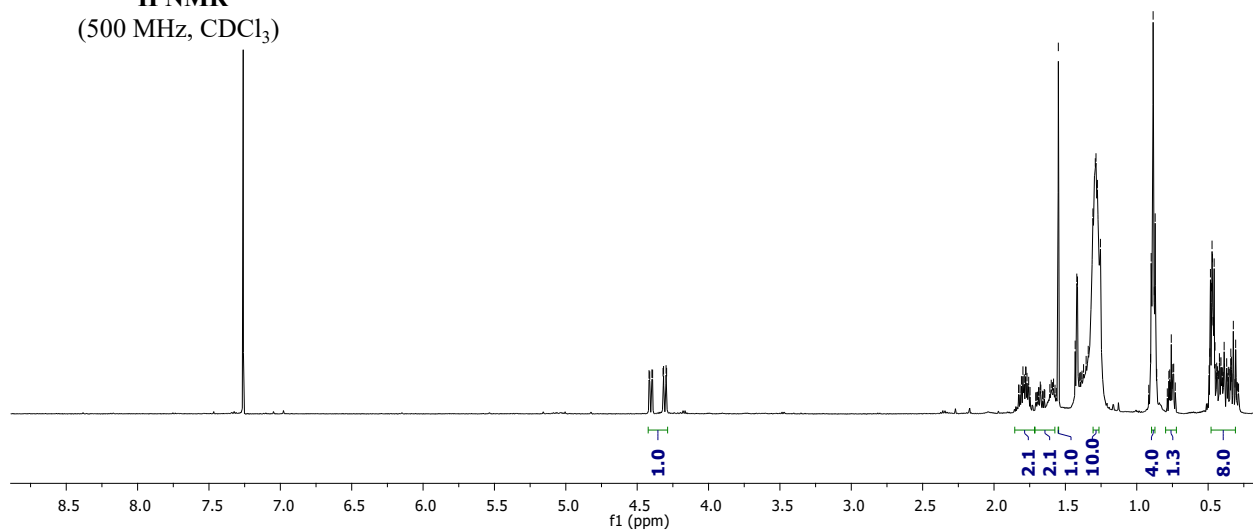

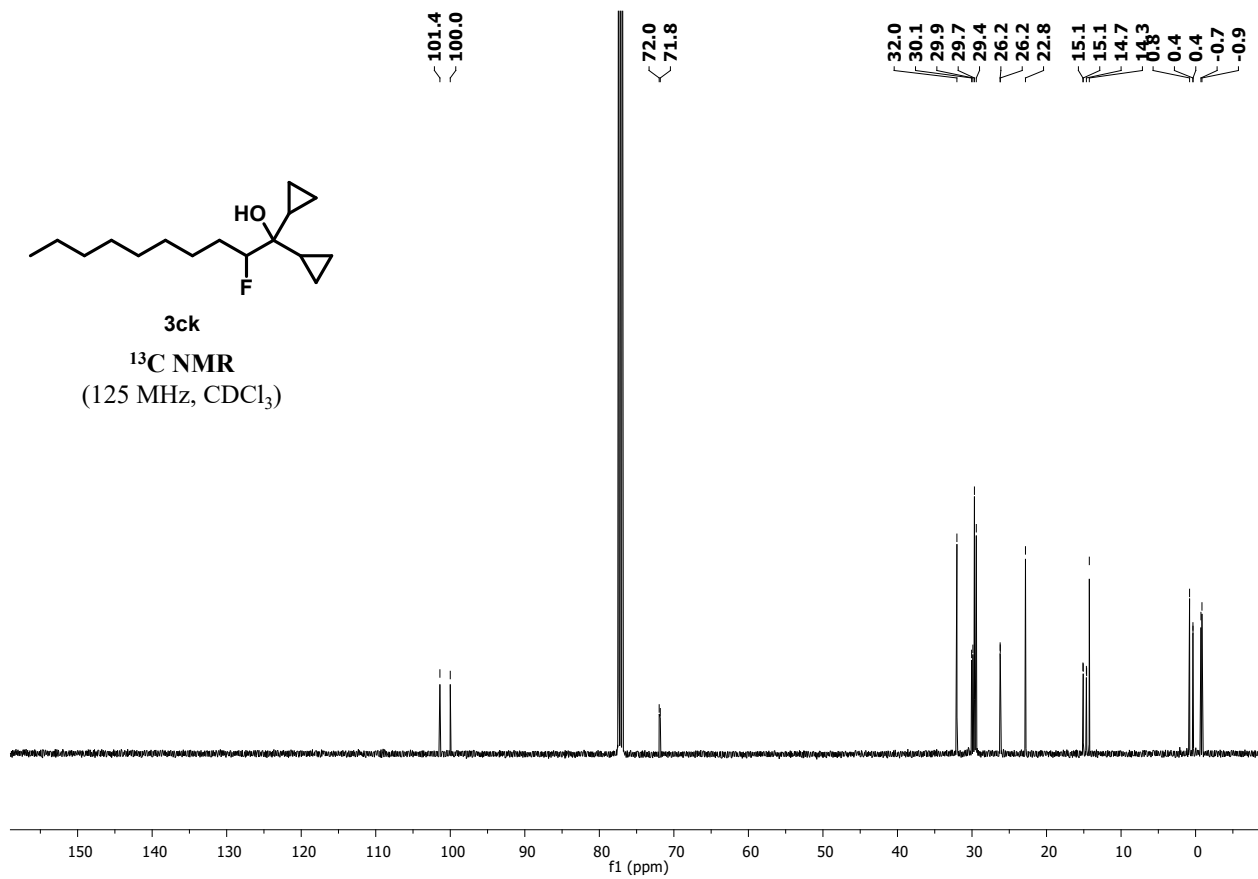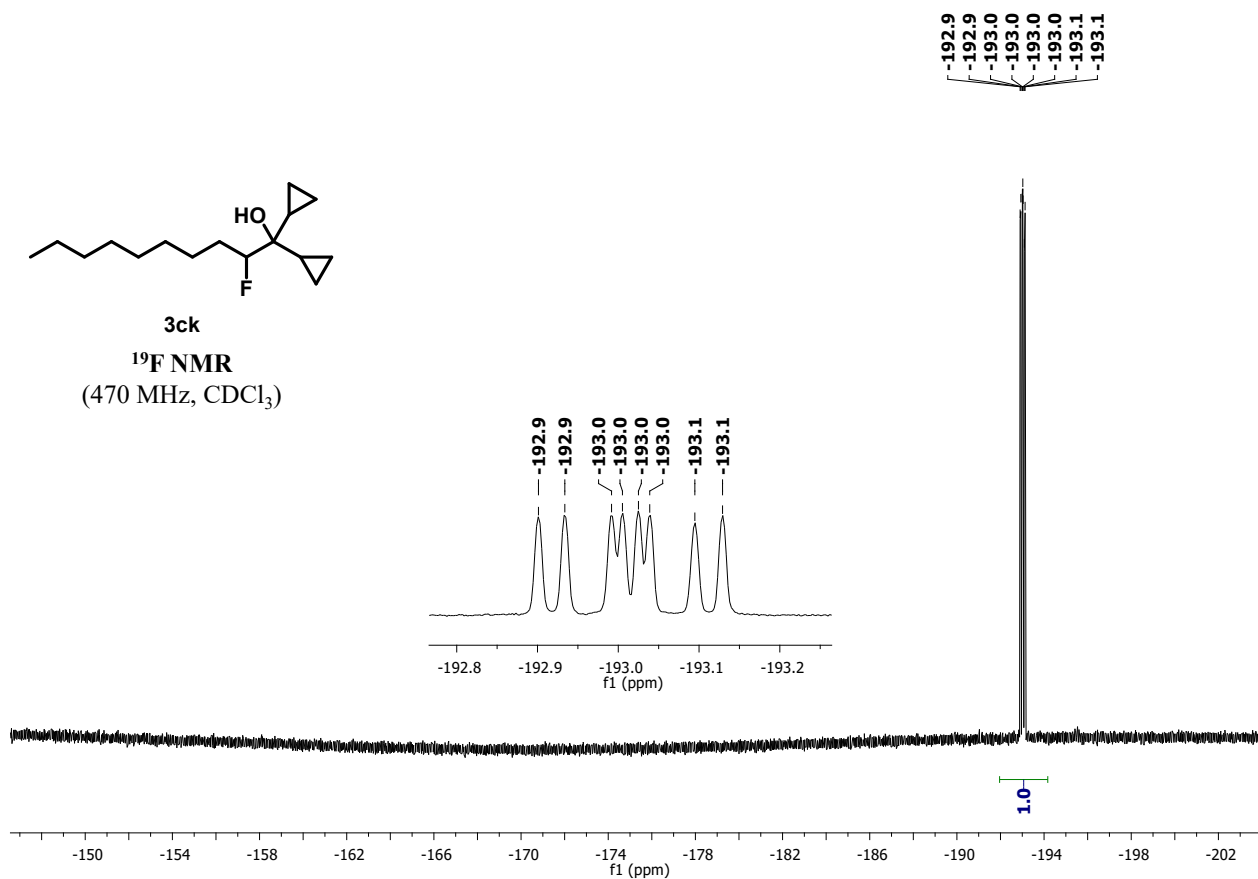

## 6. References

- 1 A. F. Burchat, J. M. Chong and N. Nielsen, *J. Organomet. Chem.*, 1997, **542**, 281.
- 2 X. Jiang, S. Sakthivel, K. Kulbitski, G. Nisnevich and M. Gandelman, 2014, 8.
- 3 W. Li, A. Varenikov and M. Gandelman, *European J. Org. Chem.*, 2020, **2020**, 3138.
- 4 X. Jiang and M. Gandelman, *J. Am. Chem. Soc.*, 2015, **137**, 2542.
- 5 W. R. Dolbier and M. Okamoto, *J. Fluor. Chem.*, 2015, **179**, 33.
- 6 M. Andresini, M. Spennacchio, M. Colella, G. Losito, A. Aramini, L. Degennaro and R. Luisi, *Org. Lett.*, 2021, **23**, 6850.
- 7 H. Bao, L. Bayeh and U. K. Tambar, *Angew. Chem. Int. Ed.*, 2014, **53**, 1664.
- 8 J. Morvan, T. McBride, I. Curbet, S. Colombel-Rouen, T. Roisnel, C. Crévisy, D. L. Browne and M. Mauduit, *Angew. Chem. Int. Ed.*, 2021, **60**, 19685.
- 9 G. Landelle, M.-O. Turcotte-Savard, L. Angers and J.-F. Paquin, *Org. Lett.*, 2011, **13**, 1568.
- 10 T. B. Patrick, L. Zhang and Q. Li, *J. Fluor. Chem.*, 2000, **102**, 11.
- 11 S. Ponra, J. Yang, S. Kerdphon and P. G. Andersson, *Angew. Chemie Int. Ed.*, 2019, **58**, 9282.
